# Supplementary material for: Drug-Induced Resistance and Phenotypic Switch in Triple-Negative Breast Cancer Can Be Controlled via Resolution and Targeting of Individualized Signaling Signatures
Source: Cancers (Basel). 2021 Oct 6;13(19):5009. doi: 10.3390/cancers13195009 (PMC8507629; doi:10.3390/cancers13195009)
Supplement: Supplementary file 1 [file cancers-13-05009-s001.zip › cancers-1398648-supplementary-final/Table S1.xlsx]

## Sheet: A. PaSSS-based barcodes
TCGA_ID	Tumor type	Patient-specific barcode (λ*1,λ*2,λ*3,….,λ*17)	Significant unbalanced processes	Suggested drug combination	breast cancer	EGFRPY1068 RPPA (expression) leves	EGFRPY1173 RPPA (expression) leves	EGFR RPPA (expression) leves
TCGA-A1-A0SF	BRCA	[ 0. 0. -1. 0. 0. 0. 0. 0. 0. 0. 0. 0. 0. 0. 0. 0. 0.]	3 (negative);	tamoxifen/enzalutamide	non-TNBC	0.345797	-0.219917	-0.437314
TCGA-A1-A0SH	BRCA	[ 0. 0. -1. 0. 0. 0. 0. 0. 0. 0. 0. 0. 0. 0. 0. 0. 0.]	3 (negative);	tamoxifen/enzalutamide	TNBC	0.412177	-0.0657973	-0.19522
TCGA-A1-A0SJ	BRCA	[ 0. 1. -1. 0. 0. 0. 0. 0. 0. 0. 0. 0. 0. 0. 0. 0. 0.]	2 (positive); 3 (negative);	ramucirumab, tamoxifen/enzalutamide	non-TNBC	-0.344464	-0.135186	-0.31208
TCGA-A1-A0SK	BRCA	[ 0. 0. 0. 0. 0. 0. -1. 0. 0. 0. 0. 0. 0. 0. 0. 0. 0.]	7 (negative);	erlotinib/tamoxifen/enzalutamide	non-TNBC	-0.142742	0.124751	-0.231579
TCGA-A1-A0SO	BRCA	[ 0. 0. 0. 0. 0. 0. 0. 0. 0. 0. 0. 0. 0. 0. 0. 0. 0.]			non-TNBC	-0.228431	-0.12795	-0.112747
TCGA-A1-A0SQ	BRCA	[ 0. 0. -1. 0. 0. 0. 0. 0. 0. 0. 0. 0. 0. 0. 0. 0. 0.]	3 (negative);	tamoxifen/enzalutamide	non-TNBC	-0.292598	0.131598	-0.476666
TCGA-A2-A04N	BRCA	[-1. 0. -1. 0. 0. 0. 0. 0. 0. 0. 0. 0. 0. 0. 0. 0. 0.]	1 (negative); 3 (negative);	erlotinib, tamoxifen/enzalutamide	non-TNBC	0.041293	-0.0885272	-0.337119
TCGA-A2-A04P	BRCA	[ 0. 0. 0. 0. 0. 0. 0. 0. 0. 0. 0. 0. 0. 0. 0. 0. 0.]			TNBC	0.448878	-0.237587	0.397303
TCGA-A2-A04Q	BRCA	[-1. 0. -1. -1. 0. 0. 0. 0. 0. 0. 0. 0. 0. 0. 0. 0. 0.]	1 (negative); 3 (negative); 4 (negative);	erlotinib, tamoxifen/enzalutamide, *	non-TNBC	0.496629	0.405516	0.374227
TCGA-A2-A04T	BRCA	[ 0. 0. 0. 0. 0. 0. 0. 0. 0. 0. 0. 0. 0. 0. 0. 0. 0.]			non-TNBC	0.136915	-0.0441163	-0.301899
TCGA-A2-A04U	BRCA	[ 0. 0. 0. 0. 0. 0. 0. 0. 0. 0. 0. 0. 0. 0. 0. 0. 0.]			TNBC	0.157719	0.125498	-0.173566
TCGA-A2-A04V	BRCA	[ 0. 0. -1. 0. 0. 0. 0. 0. 0. 0. 0. 0. 0. 0. 0. 0. 0.]	3 (negative);	tamoxifen/enzalutamide	non-TNBC	-0.249385	-0.0540484	-0.525866
TCGA-A2-A04W	BRCA	[ 0. 0. 0. 0. 0. 0. 0. 0. 0. 0. 0. 0. 0. 0. 0. 0. 0.]			non-TNBC	0.550069	-0.0788643	-0.425548
TCGA-A2-A04Y	BRCA	[ 0. 0. -1. 0. 0. 0. 0. 0. 0. 0. 0. 0. 0. 0. 0. 0. 0.]	3 (negative);	tamoxifen/enzalutamide	non-TNBC	0.0799257	-0.124391	-0.58193
TCGA-A2-A0CK	BRCA	[ 0. 0. -1. 0. 0. 0. 0. 0. 0. 0. 0. 0. 0. 0. 0. 0. 0.]	3 (negative);	tamoxifen/enzalutamide	non-TNBC	0.151057	-0.0994076	-0.156159
TCGA-A2-A0CL	BRCA	[ 0. 0. -1. 0. 0. 0. 0. 0. 0. 0. 0. 0. 0. 0. 0. 0. 0.]	3 (negative);	tamoxifen/enzalutamide	non-TNBC	0.0555999	-0.106619	-0.30497
TCGA-A2-A0CM	BRCA	[ 0. 0. 0. 0. 0. 0. 0. 0. 0. 0. 0. 0. 0. 0. 0. 0. 0.]			non-TNBC	-0.296784	-0.0880868	-0.319616
TCGA-A2-A0CP	BRCA	[ 0. 0. -1. 0. 0. 0. 0. 0. 0. 0. 0. 0. 0. 0. 0. 0. 0.]	3 (negative);	tamoxifen/enzalutamide	non-TNBC	0.107536	0.206799	-0.273003
TCGA-A2-A0CQ	BRCA	[ 0. 1. -1. 0. 0. 0. 0. 0. 0. 0. 0. 0. 0. 0. 0. 0. 0.]	2 (positive); 3 (negative);	ramucirumab, tamoxifen/enzalutamide	non-TNBC	-0.443026	-0.252456	-0.561636
TCGA-A2-A0CR	BRCA	[ 0. 0. -1. 0. 0. 0. 0. 0. 0. 0. 0. 0. 0. 0. 0. 0. 0.]	3 (negative);	tamoxifen/enzalutamide	non-TNBC	0.0683525	-0.0311903	-0.107653
TCGA-A2-A0CS	BRCA	[ 0. 0. -1. 1. 0. 0. 0. 0. 0. 0. 0. 0. 0. 0. 0. 0. 0.]	3 (negative); 4 (positive);	tamoxifen/enzalutamide, lapatinib	non-TNBC	-0.202904	-0.0442167	-0.58255
TCGA-A2-A0CT	BRCA	[ 0. 0. -1. 0. 0. 0. 0. 0. 0. 0. 0. 0. 0. 0. 0. 0. 0.]	3 (negative);	tamoxifen/enzalutamide	non-TNBC	0.164002	0.0714005	-0.505073
TCGA-A2-A0CU	BRCA	[ 0. 1. -1. 0. 0. 0. 0. 0. 0. 0. 0. 0. 0. 0. 0. 0. 0.]	2 (positive); 3 (negative);	ramucirumab, tamoxifen/enzalutamide	non-TNBC	-0.00135541	-0.0923674	-0.542891
TCGA-A2-A0CV	BRCA	[ 0. 1. -1. 0. 0. 0. 0. 0. 0. 0. 0. 0. 0. 0. 0. 0. 0.]	2 (positive); 3 (negative);	ramucirumab, tamoxifen/enzalutamide	non-TNBC	0.0447458	0.223799	-0.386032
TCGA-A2-A0CW	BRCA	[ 0. 0. -1. 0. 0. 0. 0. 0. 0. 0. 0. 0. 0. 0. 0. 0. 0.]	3 (negative);	tamoxifen/enzalutamide	non-TNBC	-0.238622	-0.215406	-0.649585
TCGA-A2-A0CX	BRCA	[ 0. 0. -1. 0. 0. 0. 0. 0. 0. 0. 0. 0. 0. 0. 0. 0. 0.]	3 (negative);	tamoxifen/enzalutamide	non-TNBC	0.975002	-0.141524	-0.461364
TCGA-A2-A0CY	BRCA	[ 0. 0. 0. 0. 0. 1. 0. 0. 0. 0. 0. 0. 0. 0. 0. 0. 0.]	6 (positive);	tamoxifen	non-TNBC	0.333637	-0.0756938	-0.00453369
TCGA-A2-A0CZ	BRCA	[-1. 0. -1. 0. 0. 0. 0. 0. 0. 0. 0. 0. 0. 0. 0. 0. 0.]	1 (negative); 3 (negative);	erlotinib, tamoxifen/enzalutamide	non-TNBC	0.54996	0.570359	0.0396366
TCGA-A2-A0D0	BRCA	[ 0. 0. 0. -1. 0. 0. 0. 0. 0. 0. 0. 0. 0. 0. 0. 0. 0.]	4 (negative);	*	non-TNBC	-0.0518959	0.153433	0.00614377
TCGA-A2-A0D1	BRCA	[ 0. 0. -1. 0. 0. 0. 0. 0. 0. 0. 0. 0. 0. 0. 0. 0. 0.]	3 (negative);	tamoxifen/enzalutamide	non-TNBC	2.15801	0.423713	2.08284
TCGA-A2-A0D2	BRCA	[ 0. 0. 0. 0. 0. 0. 0. 0. 0. 0. 0. 0. 0. 0. 0. 0. 0.]			TNBC	0.138917	0.138065	0.128673
TCGA-A2-A0D3	BRCA	[ 0. 0. -1. 0. 0. 0. 0. 0. 0. 0. 0. 0. 0. 0. 0. 0. 0.]	3 (negative);	tamoxifen/enzalutamide	non-TNBC	0.257941	-0.0683155	-0.373411
TCGA-A2-A0D4	BRCA	[ 0. 0. -1. 0. 0. 0. 0. 0. 0. 0. 0. 0. 0. 0. 0. 0. 0.]	3 (negative);	tamoxifen/enzalutamide	TNBC	-0.0102178	-0.138965	-0.570678
TCGA-A2-A0EO	BRCA	[ 0. 1. -1. 0. 0. 0. 0. 0. 0. 0. 0. 0. 0. 0. 0. 0. 0.]	2 (positive); 3 (negative);	ramucirumab, tamoxifen/enzalutamide	non-TNBC	0.091499	-0.100948	-0.556332
TCGA-A2-A0EP	BRCA	[-1. 0. -1. 0. 0. 0. 0. 0. 0. 0. 0. 0. 0. 0. 0. 0. 0.]	1 (negative); 3 (negative);	erlotinib, tamoxifen/enzalutamide	non-TNBC	0.0642643	0.0701972	0.0396619
TCGA-A2-A0EQ	BRCA	[ 0. 0. -1. 0. 0. 0. 0. 0. 0. 0. 0. 0. 0. 0. 0. 0. 0.]	3 (negative);	tamoxifen/enzalutamide	non-TNBC	1.42939	0.0418523	1.31789
TCGA-A2-A0ER	BRCA	[-1. 0. -1. -1. 0. 0. 0. 0. 0. 0. 0. 0. 0. 0. 0. 0. 0.]	1 (negative); 3 (negative); 4 (negative);	erlotinib, tamoxifen/enzalutamide, *	non-TNBC	0.584955	0.474142	0.198663
TCGA-A2-A0ES	BRCA	[-1. 0. -1. 0. 0. 0. 0. 0. 0. 0. 0. 0. 0. 0. 0. 0. 0.]	1 (negative); 3 (negative);	erlotinib, tamoxifen/enzalutamide	non-TNBC	0.249179	0.250926	-0.284283
TCGA-A2-A0EU	BRCA	[-1. 0. -1. -1. 0. 0. 0. 0. 0. 0. 0. 0. 0. 0. 0. 0. 0.]	1 (negative); 3 (negative); 4 (negative);	erlotinib, tamoxifen/enzalutamide, *	TNBC	0.176706	0.121595	-0.0937282
TCGA-A2-A0EV	BRCA	[ 0. 0. -1. 0. 0. 0. 0. 0. 0. 0. 0. 0. 0. 0. 0. 0. 0.]	3 (negative);	tamoxifen/enzalutamide	non-TNBC	0.302477	-0.120329	-0.31221
TCGA-A2-A0EW	BRCA	[-1. 0. -1. 0. 0. 0. 0. 0. 0. 0. 0. 0. 0. 0. 0. 0. 0.]	1 (negative); 3 (negative);	erlotinib, tamoxifen/enzalutamide	non-TNBC	0.0966562	0.5092	-0.0167603
TCGA-A2-A0EX	BRCA	[-1. 0. -1. 0. 0. 0. 0. 0. 0. 0. 0. 0. 0. 0. 0. 0. 0.]	1 (negative); 3 (negative);	erlotinib, tamoxifen/enzalutamide	non-TNBC	0.17733	0.146106	-0.109866
TCGA-A2-A0EY	BRCA	[ 0. 1. -1. 0. 0. 0. 0. 0. 0. 0. 0. 0. 0. 0. 0. 0. 0.]	2 (positive); 3 (negative);	ramucirumab, tamoxifen/enzalutamide	non-TNBC	1.25737	-0.0168462	-0.466253
TCGA-A2-A0ST	BRCA	[ 0. 0. 0. -1. 0. 0. 0. 0. 0. 0. 0. 0. 0. 0. 0. 0. 0.]	4 (negative);	*	non-TNBC	0.277804	-0.0210738	-0.0953637
TCGA-A2-A0SU	BRCA	[ 0. 1. -1. 0. 0. 0. 0. 0. 0. 0. 0. 0. 0. 0. 0. 0. 0.]	2 (positive); 3 (negative);	ramucirumab, tamoxifen/enzalutamide	non-TNBC	-0.356311	-0.0821203	-0.477765
TCGA-A2-A0SV	BRCA	[ 0. 0. -1. 0. 0. 0. 0. 0. 0. 0. 0. 0. 0. 0. 0. 0. 0.]	3 (negative);	tamoxifen/enzalutamide	TNBC	-0.272102	-0.141649	-0.424272
TCGA-A2-A0SW	BRCA	[ 0. 1. -1. 0. 0. 0. 0. 0. 0. 0. 0. 0. 0. 0. 0. 0. 0.]	2 (positive); 3 (negative);	ramucirumab, tamoxifen/enzalutamide	non-TNBC	-0.208169	-0.0871955	-0.451596
TCGA-A2-A0SX	BRCA	[ 0. 0. 0. 0. 0. 0. 0. 0. 0. 0. 0. 0. 0. 0. 0. 0. 0.]			non-TNBC	-0.0744562	-0.0423908	0.0212304
TCGA-A2-A0T0	BRCA	[ 0. 0. 0. 0. 0. 0. 0. 0. 0. 0. 0. 0. 0. 0. 0. 0. 0.]			non-TNBC	-0.0555875	-0.136082	-0.425742
TCGA-A2-A0T1	BRCA	[ 0. 0. 0. 0. -1. 0. 0. 1. 0. 0. 0. 0. 0. 0. 0. 0. 0.]	5 (negative); 8 (positive);	erlotinib/dasatinib, erlotinib/ramucirumab	non-TNBC	2.75555	-0.139729	-0.602166
TCGA-A2-A0T2	BRCA	[ 0. 0. 0. 0. 0. 0. 0. 0. 0. 0. 0. 0. 0. 0. 0. 0. 0.]			non-TNBC	-0.248269	-0.143827	-0.101094
TCGA-A2-A0T3	BRCA	[-1. 1. -1. -1. 0. 0. 0. 0. 0. 0. 0. 0. 0. 0. 0. 0. 0.]	1 (negative); 2 (positive); 3 (negative); 4 (negative);	erlotinib, ramucirumab, tamoxifen/enzalutamide, *	non-TNBC	0.177412	0.5508	-0.173281
TCGA-A2-A0T4	BRCA	[-1. 0. -1. 0. 0. 0. 0. 0. 0. 0. 0. 0. 0. 0. 0. 0. 0.]	1 (negative); 3 (negative);	erlotinib, tamoxifen/enzalutamide	non-TNBC	0.0590056	0.378774	0.082368
TCGA-A2-A0T5	BRCA	[ 0. 1. -1. 1. 0. 0. 0. 0. 0. 0. 0. 0. 0. 0. 0. 0. 0.]	2 (positive); 3 (negative); 4 (positive);	ramucirumab, tamoxifen/enzalutamide, lapatinib	non-TNBC	0.144703	-0.140891	-0.550469
TCGA-A2-A0T6	BRCA	[ 0. 0. -1. 0. 0. 0. 0. 0. 0. 0. 0. 0. 0. 0. 0. 0. 0.]	3 (negative);	tamoxifen/enzalutamide	TNBC	0.101714	0.208067	-0.322234
TCGA-A2-A0T7	BRCA	[ 0. 1. -1. 0. 0. 0. 0. 0. 0. 0. 0. 0. 0. 0. 0. 0. 0.]	2 (positive); 3 (negative);	ramucirumab, tamoxifen/enzalutamide	non-TNBC	0.0814667	0.364402	0.0955601
TCGA-A2-A0YC	BRCA	[-1. 0. -1. -1. 0. 0. 0. 0. 0. 0. 0. 0. 0. 0. 0. 0. 0.]	1 (negative); 3 (negative); 4 (negative);	erlotinib, tamoxifen/enzalutamide, *	non-TNBC	0.105618	0.623657	0.216962
TCGA-A2-A0YD	BRCA	[ 0. 0. -1. 0. 0. 0. 0. 0. 0. 0. 0. 0. 0. 0. 0. 0. 0.]	3 (negative);	tamoxifen/enzalutamide	non-TNBC	-0.167609	-0.00531378	-0.48376
TCGA-A2-A0YE	BRCA	[ 0. 0. 0. 0. 0. 0. 0. 0. 0. 0. 0. 0. 0. 0. 0. 0. 0.]			non-TNBC	0.0910259	-0.0480691	0.319704
TCGA-A2-A0YF	BRCA	[-1. 0. -1. -1. 0. 0. 0. 0. 0. 0. 0. 0. 0. 0. 0. 0. 0.]	1 (negative); 3 (negative); 4 (negative);	erlotinib, tamoxifen/enzalutamide, *	non-TNBC	0.152225	0.905155	0.474033
TCGA-A2-A0YG	BRCA	[ 0. 0. -1. 0. 0. 0. 0. 0. 0. 0. 0. 0. 0. 0. 0. 0. 0.]	3 (negative);	tamoxifen/enzalutamide	non-TNBC	2.03339	-0.2001	-0.184718
TCGA-A2-A0YH	BRCA	[ 0. 0. -1. 0. 0. 1. 0. 0. 0. 0. 0. 0. 0. 0. 0. 0. 0.]	3 (negative); 6 (positive);	tamoxifen/enzalutamide, tamoxifen	non-TNBC	-0.10258	-0.167087	-0.689281
TCGA-A2-A0YI	BRCA	[ 0. 0. -1. 0. 0. 0. 0. 0. 0. 0. 0. 0. 0. 0. 0. 0. 0.]	3 (negative);	tamoxifen/enzalutamide	non-TNBC	-0.178735	0.130104	-0.349078
TCGA-A2-A0YJ	BRCA	[ 0. 0. 0. 0. 0. 0. 0. 0. 0. 0. 0. 0. 0. 0. 0. 0. 0.]			non-TNBC	0.419892	-0.0312342	-0.306532
TCGA-A2-A0YK	BRCA	[-1. 0. -1. -1. 0. 0. 0. 0. 0. 0. 0. 0. 0. 0. 0. 0. 0.]	1 (negative); 3 (negative); 4 (negative);	erlotinib, tamoxifen/enzalutamide, *	non-TNBC	0.879821	0.62259	-0.0262375
TCGA-A2-A0YL	BRCA	[-1. 0. -1. 0. 0. 0. 0. 0. 0. 0. 0. 0. 0. 0. 0. 0. 0.]	1 (negative); 3 (negative);	erlotinib, tamoxifen/enzalutamide	non-TNBC	0.0681739	0.0489892	-0.343316
TCGA-A2-A0YM	BRCA	[ 0. 0. 0. 0. 0. 0. 0. 0. 0. 0. 0. 0. 0. 0. 0. 0. 0.]			non-TNBC	-0.301313	-0.143835	0.0165247
TCGA-A2-A0YT	BRCA	[ 0. 1. -1. 0. 0. 0. 0. 0. 0. 0. 0. 0. 0. 0. 0. 0. 0.]	2 (positive); 3 (negative);	ramucirumab, tamoxifen/enzalutamide	non-TNBC	-0.230797	0.32269	-0.29092
TCGA-A2-A1FV	BRCA	[ 0. 0. -1. 0. 0. 0. 0. 0. 0. 0. 0. 0. 0. 0. 0. 0. 0.]	3 (negative);	tamoxifen/enzalutamide	non-TNBC	0.0696775	0.219155	-0.0678965
TCGA-A2-A1FW	BRCA	[ 0. 0. -1. 0. 0. 0. 0. 0. 0. 0. 0. 0. 0. 0. 0. 0. 0.]	3 (negative);	tamoxifen/enzalutamide	non-TNBC	-0.289089	0.00819047	-0.155306
TCGA-A2-A1FX	BRCA	[ 0. 0. 0. 0. 0. 0. -1. 0. 0. 0. 0. 0. 0. 0. 0. 0. 0.]	7 (negative);	erlotinib/tamoxifen/enzalutamide	non-TNBC	-0.00909369	-0.0276706	-0.329768
TCGA-A2-A1FZ	BRCA	[-1. 0. -1. -1. 0. 0. 0. 0. 0. 0. 0. 0. 0. 0. 0. 0. 0.]	1 (negative); 3 (negative); 4 (negative);	erlotinib, tamoxifen/enzalutamide, *	non-TNBC	0.375324	0.957978	0.320987
TCGA-A2-A1G0	BRCA	[ 0. 1. -1. 0. 0. 0. 0. 0. 0. 0. 0. 0. 0. 0. 0. 0. 0.]	2 (positive); 3 (negative);	ramucirumab, tamoxifen/enzalutamide	non-TNBC	0.22475	0.619211	-0.553497
TCGA-A2-A1G1	BRCA	[-1. 0. -1. 0. 0. 0. 0. 0. 0. 0. 0. 0. 0. 0. 0. 0. 0.]	1 (negative); 3 (negative);	erlotinib, tamoxifen/enzalutamide	non-TNBC	1.49233	1.26289	-0.0326816
TCGA-A2-A1G4	BRCA	[ 0. 1. -1. 1. 0. 0. 0. 0. 0. 0. 0. 0. 0. 0. 0. 0. 0.]	2 (positive); 3 (negative); 4 (positive);	ramucirumab, tamoxifen/enzalutamide, lapatinib	non-TNBC	-0.605184	-0.160905	-0.195001
TCGA-A2-A1G6	BRCA	[-1. 0. 0. 0. 0. 0. 0. 0. 0. 0. 0. 0. 0. 0. 0. 0. 0.]	1 (negative);	erlotinib	non-TNBC	0.411756	2.05506	0.301525
TCGA-A2-A259	BRCA	[-1. 0. -1. -1. 0. 0. 0. 0. 0. 0. 0. 0. 0. 0. 0. 0. 0.]	1 (negative); 3 (negative); 4 (negative);	erlotinib, tamoxifen/enzalutamide, *	non-TNBC	1.03406	1.8643	-0.0610305
TCGA-A2-A25A	BRCA	[ 0. 0. -1. 0. 0. 0. 0. 0. 0. 0. 0. 0. 0. 0. 0. 0. 0.]	3 (negative);	tamoxifen/enzalutamide	TNBC	-0.12462	0.637045	-0.443511
TCGA-A2-A25B	BRCA	[ 0. 1. -1. 0. 0. 0. 0. 0. 0. 0. 0. 0. 0. 0. 0. 0. 0.]	2 (positive); 3 (negative);	ramucirumab, tamoxifen/enzalutamide	TNBC	-0.37257	0.256801	-0.513494
TCGA-A2-A25C	BRCA	[ 0. 1. -1. 0. 0. 0. -1. 0. 0. 0. 0. 0. 0. 0. 0. 0. 0.]	2 (positive); 3 (negative); 7 (negative);	ramucirumab, tamoxifen/enzalutamide, erlotinib/tamoxifen/enzalutamide	TNBC	-0.346898	0.809098	-0.489149
TCGA-A2-A25D	BRCA	[ 0. 1. -1. 0. 0. 0. 0. 0. 0. 0. 1. 0. 0. 0. 0. 0. 0.]	2 (positive); 3 (negative); 11 (positive);	ramucirumab, tamoxifen/enzalutamide, tamoxifen	non-TNBC	-0.0894649	0.644268	-0.644195
TCGA-A2-A25E	BRCA	[ 0. 1. -1. 0. 0. 0. 0. 0. 0. 0. 0. 0. 0. 0. 0. 0. 0.]	2 (positive); 3 (negative);	ramucirumab, tamoxifen/enzalutamide	non-TNBC	0.270214	0.408702	-0.400969
TCGA-A2-A25F	BRCA	[ 0. 0. 0. 0. 0. 0. 0. 0. 0. 0. 0. 0. 0. 0. 0. 0. 0.]			non-TNBC	1.08767	0.43347	0.0108408
TCGA-A2-A3KC	BRCA	[-1. 0. -1. 0. 0. 0. 0. 0. 0. 0. 0. 0. 0. 0. 0. 0. 0.]	1 (negative); 3 (negative);	erlotinib, tamoxifen/enzalutamide	non-TNBC	-0.0548091	-0.0459605	-0.32952
TCGA-A2-A3KD	BRCA	[ 0. 0. -1. 0. 0. 0. 0. 0. 0. 0. 0. 0. 0. 0. 0. 0. 0.]	3 (negative);	tamoxifen/enzalutamide	non-TNBC	0.228371	0.24792	-0.120228
TCGA-A2-A3XT	BRCA	[ 0. 0. 0. 0. 0. 0. 0. 0. 0. 0. 0. 0. 0. 0. 0. 0. 0.]			non-TNBC	0.0635511	0.0690568	-0.170773
TCGA-A2-A3XU	BRCA	[ 0. 0. 0. 0. 0. 0. 0. 0. 0. 0. 0. 0. 0. 0. 0. 0. 0.]			non-TNBC	0.778023	0.074798	0.299639
TCGA-A2-A3XV	BRCA	[ 0. 0. -1. 0. 0. 0. 0. 1. 0. 0. 0. 0. 0. 0. 0. 0. 0.]	3 (negative); 8 (positive);	tamoxifen/enzalutamide, erlotinib/ramucirumab	TNBC	0.975217	-0.178568	-0.202813
TCGA-A2-A3XW	BRCA	[ 0. 0. -1. 0. 0. 0. 0. 0. 0. 0. 0. 0. 0. 0. 0. 0. 0.]	3 (negative);	tamoxifen/enzalutamide	TNBC	0.111533	-0.193887	-0.302164
TCGA-A2-A3XX	BRCA	[-1. 0. -1. -1. 0. 0. 0. 0. 0. 0. 0. 0. 0. 0. 0. 0. 0.]	1 (negative); 3 (negative); 4 (negative);	erlotinib, tamoxifen/enzalutamide, *	non-TNBC	0.2085	0.496778	0.383559
TCGA-A2-A3XZ	BRCA	[ 0. 0. 0. 0. 0. 0. 0. 0. 0. 0. 0. 0. 0. 0. 0. 0. 0.]			non-TNBC	1.56551	-0.0754561	0.0731838
TCGA-A7-A0CD	BRCA	[ 0. 0. -1. 0. 0. 0. 0. 0. 0. 0. 0. 0. 0. 0. 0. 0. 0.]	3 (negative);	tamoxifen/enzalutamide	non-TNBC	0.273725	-0.0234173	-0.337165
TCGA-A7-A0CE	BRCA	[ 0. 0. 0. 0. 0. 0. 0. 0. 0. 0. 0. 0. 0. 0. 0. 0. 0.]			non-TNBC	0.328961	-0.120748	0.264277
TCGA-A7-A0CG	BRCA	[ 0. 0. -1. 0. 0. 0. 0. 0. 0. 0. 0. 0. 0. 0. 0. 0. 0.]	3 (negative);	tamoxifen/enzalutamide	non-TNBC	0.377521	0.0415352	-0.164495
TCGA-A7-A0CH	BRCA	[ 0. 0. -1. 1. 0. 0. 0. 0. 0. 0. 0. 0. 0. 0. 0. 0. 0.]	3 (negative); 4 (positive);	tamoxifen/enzalutamide, lapatinib	non-TNBC	0.158993	-0.0955716	-0.526704
TCGA-A7-A0CJ	BRCA	[ 0. 0. -1. 0. 0. 1. 0. 0. 0. 0. 0. 0. 0. 0. 0. 0. 0.]	3 (negative); 6 (positive);	tamoxifen/enzalutamide, tamoxifen	non-TNBC	-0.145011	-0.289901	-0.668669
TCGA-A7-A0D9	BRCA	[-1. 0. -1. 0. 0. 0. 0. 0. 0. 0. 0. 0. 0. 0. 0. 0. 0.]	1 (negative); 3 (negative);	erlotinib, tamoxifen/enzalutamide	TNBC	0.111851	0.390316	-0.178327
TCGA-A7-A0DA	BRCA	[ 0. 0. 0. 0. 0. 0. 0. 0. 0. 0. 0. 0. 0. 0. 0. 0. 0.]			non-TNBC	0.69326	0.0119432	-0.248015
TCGA-A7-A0DB	BRCA	[ 0. 0. -1. 0. 0. 0. 0. 0. 0. 0. 0. 0. 0. 0. 0. 0. 0.]	3 (negative);	tamoxifen/enzalutamide	non-TNBC	0.241677	-0.0624137	-0.406742
TCGA-A7-A0DC	BRCA	[ 0. 1. -1. 0. 0. 0. 0. 0. 0. 0. 0. 0. 0. 0. 0. 0. 0.]	2 (positive); 3 (negative);	ramucirumab, tamoxifen/enzalutamide	TNBC	-0.203045	0.108233	-0.622804
TCGA-A7-A13D	BRCA	[ 0. 0. 0. 0. 0. 0. 0. 0. 0. 0. 0. 0. 0. 1. 0. 0. 0.]	14 (positive);	vemurafenib	non-TNBC	0.464491	0.186803	0.378342
TCGA-A7-A13E	BRCA	[ 0. 0. 0. 0. 0. 0. 0. 0. 0. 0. 0. 0. 0. 0. 0. 0. 0.]			TNBC	0.291477	-0.0806965	-0.209259
TCGA-A7-A13F	BRCA	[ 0. 1. -1. 0. 0. 0. 0. 0. 0. 0. 0. 0. 0. 0. 0. 0. 0.]	2 (positive); 3 (negative);	ramucirumab, tamoxifen/enzalutamide	non-TNBC	-0.144548	-0.120125	-0.477881
TCGA-A7-A26E	BRCA	[-1. 0. -1. 0. 0. 0. 0. 0. 0. 0. 0. 0. 0. 0. 0. 0. 0.]	1 (negative); 3 (negative);	erlotinib, tamoxifen/enzalutamide	non-TNBC	1.33536	1.67534	-0.393233
TCGA-A7-A26F	BRCA	[ 0. 0. 0. 0. 0. 0. 0. 0. 0. 0. 0. 0. 0. 0. 0. 0. 0.]			non-TNBC	0.904427	0.215952	0.743903
TCGA-A7-A26G	BRCA	[-1. 0. 0. 0. 0. 0. 0. 0. -1. 0. 0. 0. 0. 0. 0. 0. 0.]	1 (negative); 9 (negative);	erlotinib, *	non-TNBC	0.27323	0.584702	-0.277088
TCGA-A7-A26H	BRCA	[ 0. 1. -1. 0. 0. 0. 0. 0. 0. 0. 0. 0. 0. 0. 0. 0. 0.]	2 (positive); 3 (negative);	ramucirumab, tamoxifen/enzalutamide	non-TNBC	0.293206	0.44075	-0.686427
TCGA-A7-A26I	BRCA	[-1. 0. 0. 0. 0. 0. 0. 0. 0. 0. 0. 0. 0. 0. 0. 0. 0.]	1 (negative);	erlotinib	non-TNBC	0.0474036	0.0162284	-0.315549
TCGA-A7-A2KD	BRCA	[ 0. 0. -1. 0. 0. 0. 0. 0. 0. 0. 0. 0. 0. 0. 0. 0. 0.]	3 (negative);	tamoxifen/enzalutamide	non-TNBC	0.417428	-0.104636	-0.448129
TCGA-A7-A3IZ	BRCA	[ 0. 0. -1. 0. 0. 0. 0. 0. 0. 0. 0. 0. 0. 0. 0. 0. 0.]	3 (negative);	tamoxifen/enzalutamide	TNBC	0.283505	-0.23652	-0.468952
TCGA-A7-A3J0	BRCA	[ 0. 0. -1. 0. 0. 0. 0. 0. 0. 0. 0. 0. 0. 0. 0. 0. 0.]	3 (negative);	tamoxifen/enzalutamide	non-TNBC	0.26495	-0.0890606	-0.206795
TCGA-A7-A3J1	BRCA	[ 0. 0. -1. 0. 0. 0. 0. 0. 0. 0. 0. 0. 0. 0. 0. 0. 0.]	3 (negative);	tamoxifen/enzalutamide	non-TNBC	0.440776	-0.0302435	-0.372479
TCGA-A7-A3RF	BRCA	[ 0. 0. -1. 0. 0. 0. 0. 0. 0. 0. 0. 0. 0. 0. 0. 0. 0.]	3 (negative);	tamoxifen/enzalutamide	non-TNBC	0.22123	0.43094	-0.00457633
TCGA-A8-A06N	BRCA	[ 0. 0. -1. 0. 0. 0. 0. 0. 0. 0. 0. 0. 0. 0. 0. 0. 0.]	3 (negative);	tamoxifen/enzalutamide	non-TNBC	0.364403	0.161118	-0.345993
TCGA-A8-A06P	BRCA	[-1. 0. -1. 0. 0. 0. 0. 0. 0. 0. 0. 0. 0. 0. 0. 0. 0.]	1 (negative); 3 (negative);	erlotinib, tamoxifen/enzalutamide	non-TNBC	0.800507	0.209053	-0.0114161
TCGA-A8-A06R	BRCA	[ 0. 0. -1. 0. 0. 1. 0. 0. 0. 0. 0. 0. 0. 0. 0. 0. 0.]	3 (negative); 6 (positive);	tamoxifen/enzalutamide, tamoxifen	TNBC	-0.00422119	-0.207399	-0.45556
TCGA-A8-A06U	BRCA	[ 0. 0. -1. 0. 0. 0. 0. 0. 0. 0. 0. 0. 0. 0. 0. 0. 0.]	3 (negative);	tamoxifen/enzalutamide	non-TNBC	-0.014543	-0.137331	-0.405843
TCGA-A8-A06X	BRCA	[ 0. 0. -1. 0. 0. 0. 0. 0. 0. 0. 0. 0. 0. 0. 0. 0. 0.]	3 (negative);	tamoxifen/enzalutamide	non-TNBC	0.061602	-0.0399001	-0.277673
TCGA-A8-A06Y	BRCA	[ 0. 0. -1. 0. 0. 0. 0. 0. 0. 0. 0. 0. 0. 0. 0. 0. 0.]	3 (negative);	tamoxifen/enzalutamide	TNBC	-0.104444	-0.120509	-0.43945
TCGA-A8-A06Z	BRCA	[ 0. 0. -1. 0. 0. 0. 0. 0. 0. 0. 0. 0. 0. 0. 0. 0. 0.]	3 (negative);	tamoxifen/enzalutamide	non-TNBC	-0.148283	-0.194923	-0.782745
TCGA-A8-A075	BRCA	[ 0. 0. -1. 0. 0. 0. 0. 0. 0. 0. 0. 0. 0. 0. 0. 0. 0.]	3 (negative);	tamoxifen/enzalutamide	non-TNBC	-0.0381749	-0.138242	-0.385117
TCGA-A8-A076	BRCA	[ 0. 0. -1. 0. 0. 0. 0. 0. 0. 0. 0. 0. 0. 0. 0. 0. 0.]	3 (negative);	tamoxifen/enzalutamide	non-TNBC	0.77068	0.107929	-0.284756
TCGA-A8-A079	BRCA	[ 0. 0. -1. 0. 0. 0. 0. 0. 0. 0. 0. 0. 0. 0. 0. 0. 0.]	3 (negative);	tamoxifen/enzalutamide	non-TNBC	0.192779	0.227199	-0.388096
TCGA-A8-A07E	BRCA	[-1. 0. -1. -1. 0. 0. 0. 0. 0. 0. 0. 0. 0. 0. 0. 0. 0.]	1 (negative); 3 (negative); 4 (negative);	erlotinib, tamoxifen/enzalutamide, *	non-TNBC	0.816028	0.615769	0.268734
TCGA-A8-A07F	BRCA	[-1. 0. -1. 0. 0. 0. 0. 0. 0. 0. 0. 0. 0. 0. 0. 0. 0.]	1 (negative); 3 (negative);	erlotinib, tamoxifen/enzalutamide	non-TNBC	0.290602	0.0607404	-0.227762
TCGA-A8-A07I	BRCA	[ 0. 0. -1. 1. 0. 0. 0. 0. 0. 0. 0. 0. 0. 0. 0. 0. 0.]	3 (negative); 4 (positive);	tamoxifen/enzalutamide, lapatinib	non-TNBC	3.77731	-0.307342	-0.594849
TCGA-A8-A07O	BRCA	[ 0. 0. 0. 0. -1. 1. 0. 0. 0. 0. 0. 0. 0. 0. 0. 0. 0.]	5 (negative); 6 (positive);	erlotinib/dasatinib, tamoxifen	non-TNBC	0.440307	-0.155862	-0.42634
TCGA-A8-A07P	BRCA	[ 0. 1. -1. 0. 0. 0. 0. 0. 0. 0. 0. 0. 0. 0. 0. 0. 0.]	2 (positive); 3 (negative);	ramucirumab, tamoxifen/enzalutamide	TNBC	0.809588	-0.197354	-0.488545
TCGA-A8-A07R	BRCA	[ 0. 0. 0. 0. 0. 0. 0. 0. 0. 0. 0. 0. 0. 0. 0. 0. 0.]			non-TNBC	0.45027	0.0548147	-0.0105545
TCGA-A8-A07S	BRCA	[ 0. 0. -1. 1. 0. 0. 0. 0. 0. 0. 0. 0. 0. 0. 0. 0. 0.]	3 (negative); 4 (positive);	tamoxifen/enzalutamide, lapatinib	non-TNBC	0.0774665	-0.156463	-0.437908
TCGA-A8-A07W	BRCA	[ 0. 1. -1. 1. 0. 0. 0. 0. 0. 0. 0. 0. 0. 0. 0. 0. 0.]	2 (positive); 3 (negative); 4 (positive);	ramucirumab, tamoxifen/enzalutamide, lapatinib	non-TNBC	-0.0959109	-0.149927	-0.631438
TCGA-A8-A07Z	BRCA	[ 0. 0. -1. 1. 0. 0. 0. 0. 0. 0. 0. 0. 0. 0. 0. 0. 0.]	3 (negative); 4 (positive);	tamoxifen/enzalutamide, lapatinib	TNBC	-0.436104	-0.198819	-0.721438
TCGA-A8-A081	BRCA	[ 0. 0. -1. 0. 0. 0. 0. 0. 0. 0. 0. 0. 0. 0. 0. 0. 0.]	3 (negative);	tamoxifen/enzalutamide	non-TNBC	0.212605	-0.17982	-0.704543
TCGA-A8-A082	BRCA	[ 0. 0. -1. 0. 0. 0. 0. 0. 0. 0. 0. 0. 0. 0. 0. 0. 0.]	3 (negative);	tamoxifen/enzalutamide	non-TNBC	-0.178865	-0.185802	-0.677442
TCGA-A8-A083	BRCA	[ 0. 0. -1. 1. 0. 0. 0. 0. 1. 0. 0. 0. 0. 0. 0. 0. 0.]	3 (negative); 4 (positive); 9 (positive);	tamoxifen/enzalutamide, lapatinib, tamoxifen	non-TNBC	0.214932	-0.270253	-0.633719
TCGA-A8-A084	BRCA	[ 0. 0. -1. 0. 0. 0. 0. 0. 0. 0. 0. 0. 0. 0. 0. 0. 0.]	3 (negative);	tamoxifen/enzalutamide	non-TNBC	0.326494	0.199124	-0.217184
TCGA-A8-A085	BRCA	[ 0. 1. -1. 0. 0. 0. 0. 0. 0. 0. 0. 0. 0. 0. 0. 0. 0.]	2 (positive); 3 (negative);	ramucirumab, tamoxifen/enzalutamide	non-TNBC	0.271763	-0.159495	-0.514723
TCGA-A8-A086	BRCA	[ 0. 0. -1. 0. 0. 0. 0. 0. 0. 0. 0. 0. 0. 0. 0. 0. 0.]	3 (negative);	tamoxifen/enzalutamide	non-TNBC	-0.148031	-0.0884671	-0.561053
TCGA-A8-A08A	BRCA	[ 0. 0. -1. 1. 0. 0. 0. 0. 0. 0. 0. 0. 0. 0. 0. 0. 0.]	3 (negative); 4 (positive);	tamoxifen/enzalutamide, lapatinib	non-TNBC	0.227346	-0.0459524	-0.524523
TCGA-A8-A08G	BRCA	[ 0. 0. -1. 0. 0. 0. 0. 0. 0. 0. 0. 0. 0. 0. 0. 0. 0.]	3 (negative);	tamoxifen/enzalutamide	non-TNBC	0.227139	-0.14066	-0.467412
TCGA-A8-A08H	BRCA	[-1. 0. -1. 0. 0. 0. 0. 0. 0. 0. 0. 0. 0. 0. 0. 0. 0.]	1 (negative); 3 (negative);	erlotinib, tamoxifen/enzalutamide	non-TNBC	-0.135867	0.202759	0.0163851
TCGA-A8-A08J	BRCA	[ 0. 0. -1. 0. -1. 0. 0. 0. 0. 0. 0. 0. 0. 0. 0. 0. 0.]	3 (negative); 5 (negative);	tamoxifen/enzalutamide, erlotinib/dasatinib	non-TNBC	3.29523	-0.084352	-0.285757
TCGA-A8-A08L	BRCA	[ 0. 0. -1. 0. 0. 0. 0. 0. 0. 0. 0. 0. 0. 0. 0. 0. 0.]	3 (negative);	tamoxifen/enzalutamide	non-TNBC	-0.12713	-0.117629	-0.498361
TCGA-A8-A08O	BRCA	[-1. 0. -1. 0. 0. 0. 0. 0. 0. 0. 0. 0. 0. 0. 0. 0. 0.]	1 (negative); 3 (negative);	erlotinib, tamoxifen/enzalutamide	non-TNBC	0.455125	0.0411878	-0.127003
TCGA-A8-A08P	BRCA	[ 0. 0. 0. 0. 0. 1. 0. 0. 0. 0. 0. 0. 0. 0. 0. 0. 0.]	6 (positive);	tamoxifen	non-TNBC	-0.0537983	-0.0815002	-0.343316
TCGA-A8-A08T	BRCA	[ 0. 0. -1. 0. 0. 0. 0. 0. 0. 0. 0. 0. 0. 0. 0. 0. 0.]	3 (negative);	tamoxifen/enzalutamide	non-TNBC	0.329224	-0.120585	-0.34526
TCGA-A8-A08X	BRCA	[ 0. 0. 0. 0. 0. 0. 0. 0. 0. 0. 0. 0. 0. 0. 0. 0. 0.]			non-TNBC	2.16439	0.0859354	0.0704794
TCGA-A8-A08Z	BRCA	[ 0. 0. -1. 0. 0. 0. 0. 0. 0. 0. 0. 0. 0. 0. 0. 0. 0.]	3 (negative);	tamoxifen/enzalutamide	non-TNBC	0.346452	-0.362852	-0.713429
TCGA-A8-A091	BRCA	[ 0. 0. -1. 0. 0. 0. 0. 0. 0. 0. 0. 0. 0. 0. 0. 0. 0.]	3 (negative);	tamoxifen/enzalutamide	non-TNBC	0.13647	0.0384382	-0.486643
TCGA-A8-A094	BRCA	[ 0. 0. 0. 0. 0. 0. 0. 0. 0. 0. 0. 0. 0. 0. 0. 0. 0.]			non-TNBC	-0.246001	-0.0902373	-0.414761
TCGA-A8-A095	BRCA	[-1. 0. -1. -1. 0. 0. 0. 0. 0. 0. 0. 0. 0. 0. 0. 0. 0.]	1 (negative); 3 (negative); 4 (negative);	erlotinib, tamoxifen/enzalutamide, *	non-TNBC	0.227243	0.71801	0.120512
TCGA-A8-A099	BRCA	[ 0. 0. -1. 0. 0. 0. 0. 0. 0. 0. 0. 0. 0. 0. 0. 0. 0.]	3 (negative);	tamoxifen/enzalutamide	non-TNBC	-0.0469037	-0.106676	-0.6462
TCGA-A8-A09A	BRCA	[ 0. 0. -1. 0. 0. 0. 0. 0. 0. 0. 0. 0. 0. 0. 0. 0. 0.]	3 (negative);	tamoxifen/enzalutamide	non-TNBC	0.305159	-0.142882	-0.498049
TCGA-A8-A09B	BRCA	[ 0. 0. -1. 0. 0. 0. 0. 0. 0. 0. 0. 0. 0. 0. 0. 0. 0.]	3 (negative);	tamoxifen/enzalutamide	non-TNBC	0.499642	-0.238966	-0.258661
TCGA-A8-A09C	BRCA	[ 0. 0. -1. 1. 0. 0. 0. 0. 0. 0. 0. 0. 0. 0. 0. 0. 0.]	3 (negative); 4 (positive);	tamoxifen/enzalutamide, lapatinib	non-TNBC	-0.0790689	-0.113818	-0.463122
TCGA-A8-A09E	BRCA	[ 0. 0. -1. 0. 0. 0. 0. 0. 1. 0. 0. 0. 0. 0. 0. 0. 0.]	3 (negative); 9 (positive);	tamoxifen/enzalutamide, tamoxifen	non-TNBC	-0.0150382	-0.0555254	-0.361991
TCGA-A8-A09G	BRCA	[ 0. 0. -1. 0. 0. 0. 0. 0. 0. 0. 0. 0. 0. 0. 0. 0. 0.]	3 (negative);	tamoxifen/enzalutamide	non-TNBC	2.02007	0.231664	-0.16013
TCGA-A8-A09I	BRCA	[ 0. 0. -1. 0. -1. 0. 0. 0. 0. 0. 0. 0. 0. 0. 1. 0. 0.]	3 (negative); 5 (negative); 15 (positive);	tamoxifen/enzalutamide, erlotinib/dasatinib, trastuzumab	non-TNBC	1.31513	-0.110362	-0.223377
TCGA-A8-A09K	BRCA	[ 0. 1. -1. 0. 0. 0. 0. 0. 0. 0. 0. 0. 0. 0. 0. 0. 0.]	2 (positive); 3 (negative);	ramucirumab, tamoxifen/enzalutamide	TNBC	0.326609	0.333575	-0.0373201
TCGA-A8-A09M	BRCA	[ 0. 1. -1. 0. 0. 0. 0. 0. 0. 0. 0. 0. 0. 0. 0. 0. 0.]	2 (positive); 3 (negative);	ramucirumab, tamoxifen/enzalutamide	non-TNBC	-0.108116	-0.115217	-0.527903
TCGA-A8-A09R	BRCA	[ 0. 0. -1. 0. 0. 0. 0. 0. 0. 0. 0. 0. 0. 0. 0. 0. 0.]	3 (negative);	tamoxifen/enzalutamide	non-TNBC	0.687638	-0.19959	-0.582132
TCGA-A8-A09W	BRCA	[ 0. 0. -1. 0. 0. 0. 0. 0. 0. 0. 1. 0. 0. 0. 0. 0. 0.]	3 (negative); 11 (positive);	tamoxifen/enzalutamide, tamoxifen	non-TNBC	0.282895	-0.173008	-0.327452
TCGA-A8-A09X	BRCA	[ 0. 0. -1. 0. 0. 0. 0. 0. 0. 1. 0. 0. 0. 0. 0. 0. 0.]	3 (negative); 10 (positive);	tamoxifen/enzalutamide, dasatinib	non-TNBC	0.194631	-0.158734	-0.343316
TCGA-A8-A09Z	BRCA	[ 0. 0. -1. 0. 0. 0. 0. 0. 0. 0. 0. 0. 0. 0. 0. 0. 0.]	3 (negative);	tamoxifen/enzalutamide	non-TNBC	0.437854	0.030475	-0.341117
TCGA-A8-A0A4	BRCA	[ 0. 0. -1. 0. 0. 0. 0. 0. 0. 0. 0. 0. 0. 0. 0. 0. 0.]	3 (negative);	tamoxifen/enzalutamide	TNBC	0.385985	0.0492331	-0.221857
TCGA-A8-A0A7	BRCA	[ 0. 0. 0. 0. 0. 0. 0. 0. 0. 0. 0. 0. 0. 0. 0. -1. 0.]	16 (negative);	trastuzumab	non-TNBC	1.4035	0.0246139	-0.140186
TCGA-AC-A23C	BRCA	[-1. 0. -1. 1. 0. 0. 0. 0. 0. 0. 0. 0. 0. 0. 0. 0. 0.]	1 (negative); 3 (negative); 4 (positive);	erlotinib, tamoxifen/enzalutamide, lapatinib	non-TNBC	1.63597	0.210996	-0.480816
TCGA-AC-A23E	BRCA	[-1. 0. -1. 0. 0. 0. 0. 0. 0. 0. 0. 0. 0. 0. 0. 0. 0.]	1 (negative); 3 (negative);	erlotinib, tamoxifen/enzalutamide	non-TNBC	0.262715	0.916843	-0.455178
TCGA-AC-A2B8	BRCA	[-1. 0. -1. 0. 0. 0. 0. 0. 0. 0. 0. 0. 0. 0. 0. 0. 0.]	1 (negative); 3 (negative);	erlotinib, tamoxifen/enzalutamide	non-TNBC	0.519596	-0.167506	-0.48845
TCGA-AC-A2BK	BRCA	[ 0. 0. 0. 0. 0. 0. 0. 0. 0. 0. 0. 0. 0. 0. 0. 0. 0.]			non-TNBC	0.414391	0.110785	-0.0207529
TCGA-AC-A2BM	BRCA	[ 0. 0. -1. 0. 0. 0. 0. 0. 0. 0. 0. 0. 0. 0. 0. 0. 0.]	3 (negative);	tamoxifen/enzalutamide	non-TNBC	-0.169489	-0.234366	-0.181172
TCGA-AC-A2FB	BRCA	[-1. 0. -1. -1. 0. 0. 0. 0. 0. 0. 0. 0. 0. 0. 0. 0. 0.]	1 (negative); 3 (negative); 4 (negative);	erlotinib, tamoxifen/enzalutamide, *	TNBC	1.07217	0.547351	0.382252
TCGA-AC-A2FE	BRCA	[ 0. 0. -1. 0. 0. 0. 0. 0. 0. 0. 0. 0. 0. 0. 0. 0. 0.]	3 (negative);	tamoxifen/enzalutamide	non-TNBC	0.365658	-0.167801	-0.239243
TCGA-AC-A2FF	BRCA	[-1. 0. -1. 0. 0. 0. 0. 0. 0. 0. 0. 0. 0. 0. 0. 0. 0.]	1 (negative); 3 (negative);	erlotinib, tamoxifen/enzalutamide	non-TNBC	0.761883	0.220323	0.0171362
TCGA-AC-A2FG	BRCA	[ 0. 0. -1. 0. 0. 0. 0. 0. 0. 0. 0. 0. 0. 0. 0. 0. 0.]	3 (negative);	tamoxifen/enzalutamide	non-TNBC	0.540774	0.108796	-0.124567
TCGA-AC-A2FM	BRCA	[ 0. 0. -1. 0. 0. 0. 0. 0. 0. 0. 0. 0. 0. 0. 0. 0. 0.]	3 (negative);	tamoxifen/enzalutamide	non-TNBC	0.39576	-0.135879	-0.485278
TCGA-AC-A2QI	BRCA	[ 0. 0. -1. 0. 0. 0. 0. 0. 0. 0. 0. 0. 0. 0. 0. 0. 0.]	3 (negative);	tamoxifen/enzalutamide	non-TNBC	0.850089	0.0466738	-0.537267
TCGA-AC-A2QJ	BRCA	[ 0. -1. 0. 0. 0. 0. 0. 0. 0. 0. 0. 0. 0. 0. 0. 0. 0.]	2 (negative);	erlotinib	non-TNBC	0.293415	-0.0491417	0.25337
TCGA-AC-A3HN	BRCA	[-1. 0. -1. -1. 0. 0. 0. 0. 0. 0. 0. 0. 0. 0. 0. 0. 0.]	1 (negative); 3 (negative); 4 (negative);	erlotinib, tamoxifen/enzalutamide, *	TNBC	0.739039	0.311947	0.451988
TCGA-AC-A3QP	BRCA	[-1. 0. -1. 0. 0. 0. 0. 0. 0. 0. 0. 0. 0. 0. 0. 0. 0.]	1 (negative); 3 (negative);	erlotinib, tamoxifen/enzalutamide	non-TNBC	0.295872	0.150982	-0.0434232
TCGA-AC-A3TM	BRCA	[ 0. 0. -1. 0. 0. 0. 0. 0. 0. 0. 0. 0. 0. 0. 0. 0. 0.]	3 (negative);	tamoxifen/enzalutamide	TNBC	-0.298728	-0.302216	-0.705176
TCGA-AC-A3TN	BRCA	[-1. 0. -1. 0. 0. 0. 0. 0. 0. 0. 0. 0. 0. 0. 0. 0. 0.]	1 (negative); 3 (negative);	erlotinib, tamoxifen/enzalutamide	non-TNBC	0.503234	0.534711	0.00242791
TCGA-AC-A3W5	BRCA	[ 0. 0. -1. 0. 0. 0. 0. 0. 0. 0. 0. 0. 0. 0. 0. 0. 0.]	3 (negative);	tamoxifen/enzalutamide	TNBC	1.67219	-0.189237	-0.371826
TCGA-AC-A3W6	BRCA	[-1. 0. -1. 0. 0. 0. 0. 0. 0. 0. 0. 0. 0. 0. 0. 0. 0.]	1 (negative); 3 (negative);	erlotinib, tamoxifen/enzalutamide	non-TNBC	0.382556	0.187154	-0.116818
TCGA-AC-A3W7	BRCA	[-1. 0. -1. 0. 0. 0. 0. 0. 0. 0. 0. 0. 0. 0. 0. 0. 0.]	1 (negative); 3 (negative);	erlotinib, tamoxifen/enzalutamide	non-TNBC	0.400088	0.290829	-0.0806445
TCGA-AC-A3YJ	BRCA	[ 0. 0. -1. 0. 0. 0. 0. 0. 0. 0. 0. 0. 0. 0. 0. 0. 0.]	3 (negative);	tamoxifen/enzalutamide	non-TNBC	0.16561	-0.178733	-0.563087
TCGA-AN-A041	BRCA	[ 0. 0. -1. 0. 0. 0. 0. 0. 0. 0. 0. 0. 0. 0. 0. 0. 0.]	3 (negative);	tamoxifen/enzalutamide	non-TNBC	0.128648	-0.0141734	-0.357847
TCGA-AN-A049	BRCA	[ 0. 0. -1. 0. 0. 0. 0. 0. 0. 0. 0. 0. 0. 0. 0. 0. 0.]	3 (negative);	tamoxifen/enzalutamide	non-TNBC	0.0638594	-0.180389	-0.342223
TCGA-AN-A04A	BRCA	[ 0. 1. -1. 0. 0. 0. 0. 0. 0. 0. 0. 0. 0. 0. 0. 0. 0.]	2 (positive); 3 (negative);	ramucirumab, tamoxifen/enzalutamide	non-TNBC	0.0523506	-0.0200952	-0.334891
TCGA-AN-A04D	BRCA	[ 0. 0. 0. 0. 0. 0. 0. 0. 0. 0. 0. 0. 0. 0. 0. 0. 0.]			non-TNBC	0.110751	0.0774438	-0.0873959
TCGA-AN-A0AJ	BRCA	[ 0. 1. -1. 0. 0. 0. -1. 0. 0. 0. 0. 0. 0. 0. 0. 0. 0.]	2 (positive); 3 (negative); 7 (negative);	ramucirumab, tamoxifen/enzalutamide, erlotinib/tamoxifen/enzalutamide	non-TNBC	-0.116077	0.0590512	-0.359724
TCGA-AN-A0AK	BRCA	[ 0. 1. -1. 0. 0. 0. 0. 0. 0. 0. 0. 0. 0. 0. 0. 0. 0.]	2 (positive); 3 (negative);	ramucirumab, tamoxifen/enzalutamide	TNBC	-0.175068	0.128288	-0.286902
TCGA-AN-A0AL	BRCA	[ 0. 0. 0. 0. 0. 0. 0. 0. 0. 0. 0. 0. 0. 0. 0. 0. 0.]			non-TNBC	0.314513	-0.0379475	0.580972
TCGA-AN-A0AM	BRCA	[ 0. 0. -1. 0. 0. 0. 0. 0. 0. 0. 0. 0. 0. 0. 0. 0. 0.]	3 (negative);	tamoxifen/enzalutamide	non-TNBC	-0.0959042	-0.0946282	-0.524249
TCGA-AN-A0AR	BRCA	[ 0. 0. 0. 0. 0. 0. 0. 0. 0. 0. 0. 0. 0. 1. 0. 0. 0.]	14 (positive);	vemurafenib	non-TNBC	0.118622	0.0524708	-0.291966
TCGA-AN-A0AS	BRCA	[ 0. 0. -1. 0. 0. 1. 0. 0. 0. 0. 0. 0. 0. 0. 0. 0. 0.]	3 (negative); 6 (positive);	tamoxifen/enzalutamide, tamoxifen	non-TNBC	-0.170186	0.11998	-0.619063
TCGA-AN-A0AT	BRCA	[ 0. 0. 0. 0. 0. 0. 0. 0. 0. 0. 0. 0. 0. 0. 0. 0. 0.]			non-TNBC	-0.0711883	0.0102424	-0.382121
TCGA-AN-A0FD	BRCA	[ 0. 1. -1. 0. 0. 0. -1. 0. 0. 0. 0. 0. 0. 0. 0. 0. 0.]	2 (positive); 3 (negative); 7 (negative);	ramucirumab, tamoxifen/enzalutamide, erlotinib/tamoxifen/enzalutamide	non-TNBC	-0.359612	-0.103369	-0.516186
TCGA-AN-A0FF	BRCA	[ 0. 0. -1. 0. 0. 0. 0. 0. 0. 0. 0. 0. 0. 0. 0. 0. 0.]	3 (negative);	tamoxifen/enzalutamide	non-TNBC	-0.312978	-0.147214	-0.66089
TCGA-AN-A0FJ	BRCA	[ 0. 0. 0. 0. 0. 0. 0. 0. 0. 0. 0. 0. 0. 0. 0. 0. 0.]			non-TNBC	0.180993	0.21887	0.297995
TCGA-AN-A0FK	BRCA	[ 0. 0. -1. 0. 0. 0. 0. 0. 0. 0. 0. 0. 0. 0. 0. 0. 0.]	3 (negative);	tamoxifen/enzalutamide	non-TNBC	0.0839722	0.064504	-0.342245
TCGA-AN-A0FL	BRCA	[ 0. 0. 0. 0. 0. 0. 0. 0. 0. 0. 0. 0. 0. 1. 0. 0. 0.]	14 (positive);	vemurafenib	non-TNBC	0.375187	0.119747	0.294503
TCGA-AN-A0FS	BRCA	[-1. 0. -1. 0. 0. 0. 0. 0. 0. 0. 0. 0. 0. 0. 0. 0. 0.]	1 (negative); 3 (negative);	erlotinib, tamoxifen/enzalutamide	non-TNBC	0.301902	0.178411	-0.203526
TCGA-AN-A0FT	BRCA	[ 0. 0. -1. 0. 0. 0. 0. 0. 0. 0. 0. 0. 0. 0. 0. 0. 0.]	3 (negative);	tamoxifen/enzalutamide	non-TNBC	1.10519	-0.0635098	-0.424041
TCGA-AN-A0FV	BRCA	[ 0. 0. -1. 0. -1. 0. 0. 1. 0. 0. 0. 0. 1. 0. 0. 0. 0.]	3 (negative); 5 (negative); 8 (positive); 13 (positive);	tamoxifen/enzalutamide, erlotinib/dasatinib, erlotinib/ramucirumab, erlotinib	non-TNBC	2.59889	-0.209627	-0.557881
TCGA-AN-A0FW	BRCA	[ 0. 0. -1. 0. 0. 0. 0. 0. 0. 0. 0. 0. 0. 0. 0. 0. 0.]	3 (negative);	tamoxifen/enzalutamide	non-TNBC	0.178914	0.0776747	-0.375638
TCGA-AN-A0FX	BRCA	[-1. 0. 0. 0. 0. 0. 0. 0. 0. 0. 0. 0. 0. 0. 0. 0. 0.]	1 (negative);	erlotinib	non-TNBC	0.209626	0.378361	-0.040806
TCGA-AN-A0FY	BRCA	[ 0. 0. -1. 0. 0. 0. 0. 0. 0. 0. 0. 0. 0. 0. 0. 0. 0.]	3 (negative);	tamoxifen/enzalutamide	non-TNBC	-0.0686369	0.00823659	-0.523488
TCGA-AN-A0FZ	BRCA	[ 0. 0. -1. 0. 0. 0. 0. 0. 0. 0. 0. 0. 0. 0. 0. 0. 0.]	3 (negative);	tamoxifen/enzalutamide	non-TNBC	0.321864	-0.14953	-0.639121
TCGA-AN-A0G0	BRCA	[ 0. 0. 0. 0. -1. 0. 0. 0. 0. 0. 0. 0. 0. 1. 0. 0. 0.]	5 (negative); 14 (positive);	erlotinib/dasatinib, vemurafenib	non-TNBC	0.41844	-0.168758	-0.0248927
TCGA-AN-A0XN	BRCA	[-1. 0. -1. 0. 0. 0. 0. 0. 0. 0. 0. 0. 0. 0. 0. 0. 0.]	1 (negative); 3 (negative);	erlotinib, tamoxifen/enzalutamide	non-TNBC	-0.176961	0.310672	-0.128991
TCGA-AN-A0XO	BRCA	[ 0. 1. -1. 0. 0. 0. 0. 0. 0. 0. 0. 0. 0. 0. 0. 0. 0.]	2 (positive); 3 (negative);	ramucirumab, tamoxifen/enzalutamide	non-TNBC	-0.140167	-0.0183998	-0.343316
TCGA-AN-A0XP	BRCA	[ 0. 0. -1. 0. 0. 0. 0. 0. 0. 0. 0. 0. 0. 0. 0. 0. 0.]	3 (negative);	tamoxifen/enzalutamide	non-TNBC	0.57195	0.159676	-0.466838
TCGA-AN-A0XS	BRCA	[ 0. 0. -1. 0. 0. 0. 0. 0. 0. 0. 0. 0. 0. 0. 0. 0. 0.]	3 (negative);	tamoxifen/enzalutamide	non-TNBC	-0.0568595	-0.00289209	-0.360665
TCGA-AN-A0XT	BRCA	[ 0. 1. -1. 0. 0. 0. 0. 0. 0. 0. 0. 0. 0. 0. 0. 0. 0.]	2 (positive); 3 (negative);	ramucirumab, tamoxifen/enzalutamide	non-TNBC	0.100017	-0.130958	-0.688588
TCGA-AN-A0XU	BRCA	[ 0. 0. 0. 0. 0. 1. 0. 0. 0. 0. 0. 0. 0. 0. 0. 0. 0.]	6 (positive);	tamoxifen	non-TNBC	0.202786	-0.167097	0.121941
TCGA-AN-A0XW	BRCA	[ 0. 0. -1. 0. 0. 0. 0. 0. 0. 0. 0. 0. 0. 0. 0. 0. 0.]	3 (negative);	tamoxifen/enzalutamide	non-TNBC	-0.26352	-0.0655883	-0.353888
TCGA-AO-A03L	BRCA	[ 0. 0. -1. 0. 0. 0. 0. 0. 0. 0. 0. 0. 0. 0. 0. 0. 0.]	3 (negative);	tamoxifen/enzalutamide	non-TNBC	0.0566101	-0.0408928	-0.323631
TCGA-AO-A03M	BRCA	[ 0. 0. 0. 0. 0. 0. 0. 0. 0. 0. 0. 0. 0. 0. 0. 0. 0.]			non-TNBC	-0.0970897	-0.011853	-0.390123
TCGA-AO-A03N	BRCA	[ 0. 1. 0. 0. 0. 0. -1. 0. 0. 0. 0. 0. 0. 0. 0. 0. 0.]	2 (positive); 7 (negative);	ramucirumab, erlotinib/tamoxifen/enzalutamide	non-TNBC	-0.415333	0.0543509	0.0395423
TCGA-AO-A03O	BRCA	[ 1. 1. -1. 0. 0. 0. 0. 0. 0. 0. 0. 0. 0. 0. 0. 0. 0.]	1 (positive); 2 (positive); 3 (negative);	tamoxifen, ramucirumab, tamoxifen/enzalutamide	non-TNBC	-0.0926437	0.022583	-0.500245
TCGA-AO-A03P	BRCA	[ 0. 1. -1. 0. 0. 0. -1. 0. 0. 0. 0. 0. 0. 0. 0. 0. 0.]	2 (positive); 3 (negative); 7 (negative);	ramucirumab, tamoxifen/enzalutamide, erlotinib/tamoxifen/enzalutamide	non-TNBC	0.0173399	-0.132214	-0.38509
TCGA-AO-A03U	BRCA	[ 0. 0. 0. 0. 0. 0. 0. 0. 0. 0. 0. 0. 0. 0. 0. 0. 0.]			non-TNBC	-0.0428303	-0.0831809	0.733636
TCGA-AO-A0J2	BRCA	[ 0. 0. 0. 0. 0. 0. 0. 0. 0. 0. 0. 0. 0. 0. 0. 0. 0.]			non-TNBC	0.0279603	-0.0899036	0.0648793
TCGA-AO-A0J3	BRCA	[ 0. 1. -1. 0. 0. 0. -1. 0. 0. 0. 0. 0. 0. 0. 0. 0. 0.]	2 (positive); 3 (negative); 7 (negative);	ramucirumab, tamoxifen/enzalutamide, erlotinib/tamoxifen/enzalutamide	non-TNBC	-0.263238	-0.142275	-0.646908
TCGA-AO-A0J5	BRCA	[ 0. 0. -1. 0. 0. 0. 0. 0. 0. 0. 0. 0. 0. 0. 0. 0. 0.]	3 (negative);	tamoxifen/enzalutamide	non-TNBC	0.425907	0.277502	-0.140944
TCGA-AO-A0J6	BRCA	[ 0. 0. 0. 0. 0. 0. 0. 0. 0. 0. 0. 0. 0. 0. 0. 0. 0.]			non-TNBC	-0.120717	-0.21019	0.0523595
TCGA-AO-A0J7	BRCA	[ 0. 0. -1. 0. 0. 0. 0. 0. 0. 0. 0. 0. 0. 0. 0. 0. 0.]	3 (negative);	tamoxifen/enzalutamide	non-TNBC	-0.131102	-0.276575	-0.599901
TCGA-AO-A0J8	BRCA	[ 0. 0. -1. 0. 0. 0. 0. 0. 0. 0. 0. 0. 0. 0. 0. 0. 0.]	3 (negative);	tamoxifen/enzalutamide	non-TNBC	-0.306765	0.219198	0.0547406
TCGA-AO-A0J9	BRCA	[ 0. 0. -1. 0. 0. 0. 0. 0. 0. 0. 0. 0. 0. 0. 0. 0. 0.]	3 (negative);	tamoxifen/enzalutamide	TNBC	-0.0468762	0.150549	-0.252781
TCGA-AO-A0JB	BRCA	[ 0. 1. -1. 0. 0. 0. 0. 0. 0. 0. 0. 0. 0. 0. 0. 0. 0.]	2 (positive); 3 (negative);	ramucirumab, tamoxifen/enzalutamide	non-TNBC	0.248525	0.2007	-0.127587
TCGA-AO-A0JC	BRCA	[ 0. 0. -1. 0. 0. 0. 0. 0. 1. 0. 0. 0. 0. 0. 0. 0. 0.]	3 (negative); 9 (positive);	tamoxifen/enzalutamide, tamoxifen	non-TNBC	-0.216951	-0.097178	-0.448727
TCGA-AO-A0JD	BRCA	[ 0. 0. 0. 0. 0. 0. -1. 0. 0. 0. 0. 0. 0. 0. 0. 0. 0.]	7 (negative);	erlotinib/tamoxifen/enzalutamide	non-TNBC	-0.121559	0.01755	-0.512074
TCGA-AO-A0JE	BRCA	[ 0. 0. 0. 0. 0. 0. 0. 0. 0. 0. 0. 0. 0. 0. 0. 0. 0.]			TNBC	0.215637	-0.0592261	-0.425723
TCGA-AO-A0JF	BRCA	[ 0. 0. -1. 0. 0. 0. 0. 0. 0. 0. 0. 0. 0. 0. 0. 0. 0.]	3 (negative);	tamoxifen/enzalutamide	non-TNBC	0.654384	0.117516	-0.27875
TCGA-AO-A0JG	BRCA	[ 0. 1. -1. 0. 0. 0. 0. 0. 0. -1. 0. 0. 0. 0. 0. 0. 0.]	2 (positive); 3 (negative); 10 (negative);	ramucirumab, tamoxifen/enzalutamide, erlotinib/tamoxifen/vemurafenib	non-TNBC	-0.00835924	0.1809	-0.331016
TCGA-AO-A0JI	BRCA	[ 0. 1. -1. -1. 0. 0. 0. 0. 1. 0. 0. 1. 0. 0. 0. 1. 0.]	2 (positive); 3 (negative); 4 (negative); 9 (positive); 12 (positive); 16 (positive);	ramucirumab, tamoxifen/enzalutamide, *, tamoxifen, dasatinib, ramucirumab/dasatinib	non-TNBC	0.0328261	0.12879	-0.343316
TCGA-AO-A0JJ	BRCA	[ 0. 0. -1. 0. 0. 0. 0. 0. 0. 0. 0. 0. 0. 0. 0. 0. 0.]	3 (negative);	tamoxifen/enzalutamide	non-TNBC	-0.00375118	0.112211	-0.0883218
TCGA-AO-A0JL	BRCA	[ 0. 0. 0. 0. 0. 0. 0. 0. 0. 0. 0. 0. 0. 0. 0. 0. 0.]			non-TNBC	0.0745498	-0.0297395	-0.180386
TCGA-AO-A0JM	BRCA	[-1. 0. -1. -1. 0. 0. 0. 0. 0. 0. 0. 0. 0. 0. 0. 0. 0.]	1 (negative); 3 (negative); 4 (negative);	erlotinib, tamoxifen/enzalutamide, *	non-TNBC	0.453533	0.737957	0.500527
TCGA-AO-A124	BRCA	[ 0. 0. 0. 0. 0. 0. 0. 0. 0. 0. 0. 0. 0. 0. 0. 0. 0.]			non-TNBC	-0.176617	-0.0569119	-0.147105
TCGA-AO-A126	BRCA	[ 0. 0. -1. 0. 0. 0. 0. 0. 0. 0. 0. 0. 0. 0. 0. 0. 0.]	3 (negative);	tamoxifen/enzalutamide	non-TNBC	-0.459869	-0.0914342	-0.159644
TCGA-AO-A128	BRCA	[ 0. 0. 0. 0. 0. 0. 0. 0. 0. 0. 0. 0. 0. -1. 0. -1. 0.]	14 (negative); 16 (negative);	erlotinib/tamoxifen/dasatinib, trastuzumab	non-TNBC	-0.183473	-0.0362674	-0.0541709
TCGA-AO-A129	BRCA	[ 0. 0. 0. 0. 0. 0. 0. 0. 0. 0. 0. 0. 0. 0. 0. 0. 0.]			non-TNBC	-0.0900606	0.0403983	-0.0074806
TCGA-AO-A12A	BRCA	[ 0. 0. -1. 1. 0. 0. 0. 0. 0. 0. 0. 0. 0. 0. 0. 0. 0.]	3 (negative); 4 (positive);	tamoxifen/enzalutamide, lapatinib	non-TNBC	-0.0909732	-0.0838931	-0.407058
TCGA-AO-A12B	BRCA	[ 0. 1. -1. 0. 0. 0. -1. 0. 0. 0. 0. 0. 0. 0. 0. 0. 0.]	2 (positive); 3 (negative); 7 (negative);	ramucirumab, tamoxifen/enzalutamide, erlotinib/tamoxifen/enzalutamide	non-TNBC	0.125744	0.571999	-0.26593
TCGA-AO-A12C	BRCA	[ 0. 1. -1. 0. 0. 0. 0. 0. 0. 0. 0. 0. 0. 0. 0. 0. 0.]	2 (positive); 3 (negative);	ramucirumab, tamoxifen/enzalutamide	non-TNBC	-0.354898	-0.0417267	0.00619339
TCGA-AO-A12D	BRCA	[ 0. 0. 0. 0. 0. 0. 0. 0. 0. 0. 0. 0. 0. 0. 0. 0. 0.]			non-TNBC	-0.00468642	-0.0975084	-0.10361
TCGA-AO-A12E	BRCA	[ 0. 0. -1. 0. 0. 0. 0. 0. 0. 0. 0. 0. 0. 0. 0. 0. 0.]	3 (negative);	tamoxifen/enzalutamide	non-TNBC	0.203612	0.0170779	-0.232053
TCGA-AO-A12F	BRCA	[ 0. 0. 0. 0. 0. 0. 0. 0. 0. 0. 0. 0. 0. 1. 0. 0. 0.]	14 (positive);	vemurafenib	TNBC	-0.00983597	0.155198	-0.196637
TCGA-AO-A12G	BRCA	[ 0. 0. -1. 0. 0. 0. 0. 0. 0. 0. 0. 0. 0. 0. 0. 0. 0.]	3 (negative);	tamoxifen/enzalutamide	non-TNBC	0.412704	-0.112756	-0.41977
TCGA-AO-A12H	BRCA	[ 0. 0. -1. 0. 0. 0. 0. 0. 0. 0. 0. 0. 0. 0. 0. 0. 0.]	3 (negative);	tamoxifen/enzalutamide	non-TNBC	-0.141043	0.0765677	-0.459417
TCGA-AO-A1KO	BRCA	[-1. 0. -1. 0. 0. 0. 0. 0. 0. 0. 0. 0. 0. 0. 0. 0. 0.]	1 (negative); 3 (negative);	erlotinib, tamoxifen/enzalutamide	non-TNBC	1.25545	1.14168	-0.361074
TCGA-AO-A1KP	BRCA	[-1. 0. -1. 0. 0. 0. 0. 0. 0. 0. 0. 0. 0. 0. 0. 0. 0.]	1 (negative); 3 (negative);	erlotinib, tamoxifen/enzalutamide	non-TNBC	0.0922337	1.89069	-0.0940489
TCGA-AO-A1KQ	BRCA	[ 0. 1. -1. 0. 0. 0. 0. 0. 0. 0. 0. 0. 0. 0. 0. 0. 0.]	2 (positive); 3 (negative);	ramucirumab, tamoxifen/enzalutamide	non-TNBC	-0.762183	0.0418178	-0.731063
TCGA-AO-A1KR	BRCA	[ 0. 1. 0. 0. 0. 0. 0. 0. 0. 0. 0. 0. 0. 0. 0. 0. 0.]	2 (positive);	ramucirumab	non-TNBC	-0.27577	0.0597914	-0.345719
TCGA-AO-A1KS	BRCA	[ 0. 1. -1. 0. 0. 0. 0. 0. 0. 0. 0. 0. 0. 0. 0. 0. 0.]	2 (positive); 3 (negative);	ramucirumab, tamoxifen/enzalutamide	non-TNBC	-0.28122	0.00700917	-0.600372
TCGA-AO-A1KT	BRCA	[ 0. 1. -1. 0. 0. 0. 0. 0. 0. 0. 0. 0. 0. 0. 0. 0. 0.]	2 (positive); 3 (negative);	ramucirumab, tamoxifen/enzalutamide	non-TNBC	0.200709	0.151948	-0.547984
TCGA-AQ-A04L	BRCA	[-1. 0. -1. -1. 0. 0. 0. 0. 0. 0. 0. 0. 0. 0. 0. 0. 0.]	1 (negative); 3 (negative); 4 (negative);	erlotinib, tamoxifen/enzalutamide, *	non-TNBC	0.633381	0.750718	0.299794
TCGA-AQ-A1H2	BRCA	[ 0. 1. -1. 1. 1. 0. -1. 0. 0. 0. 0. 0. 0. 0. 0. 0. 0.]	2 (positive); 3 (negative); 4 (positive); 5 (positive); 7 (negative);	ramucirumab, tamoxifen/enzalutamide, lapatinib, tamoxifen, erlotinib/tamoxifen/enzalutamide	non-TNBC	-0.456536	0.0129905	-0.608705
TCGA-AQ-A1H3	BRCA	[-1. 0. -1. 0. 0. 0. 0. 0. 0. 0. 0. 0. 0. 0. 0. 0. 0.]	1 (negative); 3 (negative);	erlotinib, tamoxifen/enzalutamide	TNBC	2.43452	1.54065	0.300978
TCGA-AR-A0TP	BRCA	[ 0. 0. 0. 0. 0. 0. 0. 0. 0. 0. 0. 0. 0. 0. 0. 0. 0.]			non-TNBC	0.0471525	-0.16867	-0.298619
TCGA-AR-A0TQ	BRCA	[ 0. 0. -1. 0. 0. 0. 0. 0. 0. 0. 0. 0. 0. 0. 0. 0. 0.]	3 (negative);	tamoxifen/enzalutamide	non-TNBC	1.35326	-0.169532	-0.504115
TCGA-AR-A0TR	BRCA	[ 0. 0. -1. 1. 0. 0. 0. 0. 0. 0. 0. 0. 0. 0. 0. 0. 0.]	3 (negative); 4 (positive);	tamoxifen/enzalutamide, lapatinib	non-TNBC	0.350877	-0.197273	-0.715521
TCGA-AR-A0TS	BRCA	[ 0. 0. 0. 0. 0. 0. 0. 0. -1. 0. 0. 0. 0. 0. 0. 0. 0.]	9 (negative);	*	non-TNBC	0.0924594	-0.190454	-0.356122
TCGA-AR-A0TT	BRCA	[ 0. 0. -1. 0. 0. 0. 0. 0. 0. 0. 0. 0. 0. 0. 0. 0. 0.]	3 (negative);	tamoxifen/enzalutamide	non-TNBC	-0.0461516	-0.171747	-0.550714
TCGA-AR-A0TU	BRCA	[ 0. 0. 0. 0. 0. 0. 0. 0. 0. 0. 0. 0. 0. 0. 0. 0. 0.]			non-TNBC	-0.157093	-0.114598	-0.284819
TCGA-AR-A0TV	BRCA	[ 0. 0. -1. 0. 0. 0. 0. 0. 0. 0. 0. 0. 0. 0. 0. 0. 0.]	3 (negative);	tamoxifen/enzalutamide	non-TNBC	-0.178841	-0.0243746	-0.337915
TCGA-AR-A0TW	BRCA	[ 0. 1. 0. 0. 0. 0. 0. 0. 0. 0. 0. 0. 0. 0. 0. 0. 0.]	2 (positive);	ramucirumab	non-TNBC	-0.0183135	0.0874268	-0.187222
TCGA-AR-A0TX	BRCA	[ 0. 0. -1. 0. -1. 1. 0. 0. 0. 0. 0. 0. 0. 0. 0. 0. 0.]	3 (negative); 5 (negative); 6 (positive);	tamoxifen/enzalutamide, erlotinib/dasatinib, tamoxifen	non-TNBC	0.987349	0.136841	-0.122037
TCGA-AR-A0TY	BRCA	[ 0. 0. -1. 0. 0. 0. 0. 0. 0. 0. 0. 0. 0. 0. 0. 0. 0.]	3 (negative);	tamoxifen/enzalutamide	non-TNBC	-0.00336244	0.0876143	-0.307916
TCGA-AR-A0TZ	BRCA	[-1. 0. -1. -1. 0. 0. 0. 0. 0. 0. 0. 0. 0. 0. 0. 0. 0.]	1 (negative); 3 (negative); 4 (negative);	erlotinib, tamoxifen/enzalutamide, *	non-TNBC	0.10629	0.62088	0.293786
TCGA-AR-A0U0	BRCA	[ 0. 0. 0. 0. 0. 0. 0. 0. 0. 0. 0. 0. 0. 0. -1. -1. 0.]	15 (negative); 16 (negative);	*, trastuzumab	non-TNBC	0.0505859	-0.114816	-0.0140616
TCGA-AR-A0U1	BRCA	[ 0. 0. 0. 0. 0. 0. 0. 0. 0. 0. 0. 0. 0. 0. 0. 0. 0.]			non-TNBC	-0.0691921	-0.160505	-0.339402
TCGA-AR-A0U2	BRCA	[-1. 0. -1. -1. 0. 0. 0. 0. 0. 0. 0. 0. 0. 0. 0. 0. 0.]	1 (negative); 3 (negative); 4 (negative);	erlotinib, tamoxifen/enzalutamide, *	non-TNBC	-0.0556185	0.972959	0.136002
TCGA-AR-A0U3	BRCA	[ 0. 0. -1. 0. 0. 0. 0. 0. 0. 0. 0. 0. 0. 0. 0. 0. 0.]	3 (negative);	tamoxifen/enzalutamide	non-TNBC	-0.223212	-0.193425	-0.579261
TCGA-AR-A0U4	BRCA	[ 0. 0. 0. -1. 0. 0. -1. 0. 0. 0. 0. 0. 0. 0. 0. 0. 0.]	4 (negative); 7 (negative);	*, erlotinib/tamoxifen/enzalutamide	non-TNBC	0.583267	0.339721	0.785413
TCGA-AR-A1AH	BRCA	[ 0. 0. 0. 0. 0. 0. 0. 0. 0. 0. 0. 0. 0. 0. 0. 0. 0.]			non-TNBC	0.255683	-0.118534	-0.179359
TCGA-AR-A1AI	BRCA	[ 0. 0. 0. 0. 0. 0. 0. 0. 0. 0. 0. 0. 0. 0. 0. 0. 0.]			non-TNBC	-0.277377	-0.0635128	-0.243669
TCGA-AR-A1AJ	BRCA	[ 0. 0. 0. 0. 0. 0. 0. 0. 0. 0. 0. 0. 0. 0. 0. 0. 0.]			TNBC	0.249945	-0.127512	-0.0844203
TCGA-AR-A1AK	BRCA	[ 0. 1. -1. 0. 0. 0. 0. 0. 0. 0. 0. 0. 0. 0. 0. 0. 0.]	2 (positive); 3 (negative);	ramucirumab, tamoxifen/enzalutamide	non-TNBC	0.350586	-0.146572	-0.149813
TCGA-AR-A1AL	BRCA	[-1. 0. -1. 0. 0. 0. 0. 0. 0. 0. 0. 0. 0. 0. 0. 0. 0.]	1 (negative); 3 (negative);	erlotinib, tamoxifen/enzalutamide	non-TNBC	0.685088	0.431305	-0.130735
TCGA-AR-A1AM	BRCA	[-1. 0. -1. 0. 0. 0. 0. 0. 0. 0. 0. 0. 0. 0. 0. 0. 0.]	1 (negative); 3 (negative);	erlotinib, tamoxifen/enzalutamide	non-TNBC	0.558787	0.127395	0.106243
TCGA-AR-A1AO	BRCA	[ 0. 0. 0. 0. 0. 0. 0. 1. 0. 0. 0. 0. 0. 0. 0. 0. 0.]	8 (positive);	erlotinib/ramucirumab	non-TNBC	0.201701	-0.0332084	-0.153792
TCGA-AR-A1AP	BRCA	[ 0. 0. -1. 0. 0. 0. 0. 0. 0. 0. 0. 0. 0. 0. 0. 0. 0.]	3 (negative);	tamoxifen/enzalutamide	non-TNBC	0.000993859	-0.0825411	-0.328937
TCGA-AR-A1AQ	BRCA	[ 0. 0. 0. 0. 0. 0. 0. 0. 0. 0. 0. 0. 0. 0. 0. 0. 0.]			TNBC	-0.0491151	-0.0706372	-0.15623
TCGA-AR-A1AS	BRCA	[ 0. 0. -1. 0. 0. 0. 0. 0. 0. 0. 0. 0. 0. 0. 0. 0. 0.]	3 (negative);	tamoxifen/enzalutamide	non-TNBC	-0.131015	-0.368174	-0.589709
TCGA-AR-A1AT	BRCA	[ 0. 0. -1. 0. 0. 0. 0. 1. 0. 0. 0. 0. 0. 0. 0. 0. 0.]	3 (negative); 8 (positive);	tamoxifen/enzalutamide, erlotinib/ramucirumab	non-TNBC	1.68057	-0.0552405	-0.306748
TCGA-AR-A1AU	BRCA	[ 0. 0. -1. 0. 0. 0. 0. 0. 0. 0. 0. 0. 0. 0. 0. 0. 0.]	3 (negative);	tamoxifen/enzalutamide	non-TNBC	0.291621	0.124445	-0.143224
TCGA-AR-A1AV	BRCA	[ 0. 1. -1. 0. 0. 0. 0. 0. 0. 0. 0. 0. 0. 0. 0. 0. 0.]	2 (positive); 3 (negative);	ramucirumab, tamoxifen/enzalutamide	non-TNBC	-0.3868	-0.177065	-0.559709
TCGA-AR-A1AW	BRCA	[ 0. 0. -1. 0. 0. 0. 0. 0. 0. 0. 0. 0. 0. 0. 0. 0. 0.]	3 (negative);	tamoxifen/enzalutamide	non-TNBC	0.145006	-0.0881396	0.0834032
TCGA-AR-A1AX	BRCA	[-1. 0. -1. -1. 0. 0. 0. 0. 0. 0. 0. 0. 0. 0. 0. 0. 0.]	1 (negative); 3 (negative); 4 (negative);	erlotinib, tamoxifen/enzalutamide, *	non-TNBC	0.854481	0.507674	0.311317
TCGA-AR-A1AY	BRCA	[ 0. 0. 0. 0. 0. 0. 0. 0. 0. 0. 0. 0. 0. 0. 0. 0. 0.]			non-TNBC	-0.236015	-0.145065	-0.113585
TCGA-AR-A24K	BRCA	[ 0. 1. -1. 0. 0. 0. 0. 0. 0. 0. 0. 0. 0. 0. 0. 0. 0.]	2 (positive); 3 (negative);	ramucirumab, tamoxifen/enzalutamide	non-TNBC	-0.280084	-0.399094	-0.834313
TCGA-AR-A24L	BRCA	[ 0. 0. -1. 0. 0. 0. 0. 0. 0. 0. 0. 0. 0. 0. 0. 0. 0.]	3 (negative);	tamoxifen/enzalutamide	non-TNBC	0.126314	0.321672	-0.556289
TCGA-AR-A24M	BRCA	[ 0. 1. -1. 0. 0. 0. 0. 0. 0. 0. 0. 0. 0. 0. 0. 0. 0.]	2 (positive); 3 (negative);	ramucirumab, tamoxifen/enzalutamide	non-TNBC	0.746066	0.321975	-0.751806
TCGA-AR-A24N	BRCA	[ 0. 1. -1. 0. 0. 0. 0. 0. 0. 0. 0. 0. 0. 0. 0. 0. 0.]	2 (positive); 3 (negative);	ramucirumab, tamoxifen/enzalutamide	non-TNBC	0.304313	0.00853342	-0.388323
TCGA-AR-A24O	BRCA	[-1. 0. -1. 0. 0. 0. 0. 0. 0. 0. 0. 0. 0. 0. 0. 0. 0.]	1 (negative); 3 (negative);	erlotinib, tamoxifen/enzalutamide	non-TNBC	0.114817	0.588595	-0.41231
TCGA-AR-A24P	BRCA	[ 0. 1. -1. 0. 0. 0. 0. 0. 0. 0. 0. 0. 0. 0. 0. 0. 0.]	2 (positive); 3 (negative);	ramucirumab, tamoxifen/enzalutamide	TNBC	-0.413802	-0.0234259	-0.429994
TCGA-AR-A24Q	BRCA	[-1. 0. 0. 0. 0. 0. 0. 0. 0. 0. 0. 0. 0. 0. 0. 0. 0.]	1 (negative);	erlotinib	non-TNBC	-0.117283	0.683785	-0.331303
TCGA-AR-A24R	BRCA	[ 0. 0. -1. 0. 0. 0. 0. 1. 0. 0. 0. 0. 0. 0. 0. 0. 0.]	3 (negative); 8 (positive);	tamoxifen/enzalutamide, erlotinib/ramucirumab	non-TNBC	0.524901	0.0239062	-0.431996
TCGA-AR-A24S	BRCA	[ 0. 1. -1. 0. 0. 0. 0. 0. 0. 0. 0. 0. 0. 0. 0. 0. 0.]	2 (positive); 3 (negative);	ramucirumab, tamoxifen/enzalutamide	TNBC	0.00868611	0.278486	-0.427019
TCGA-AR-A24T	BRCA	[-1. 1. -1. 0. 0. 0. 0. 0. 0. 0. 0. 0. 0. 0. 0. 0. 0.]	1 (negative); 2 (positive); 3 (negative);	erlotinib, ramucirumab, tamoxifen/enzalutamide	non-TNBC	0.327924	1.09806	-0.437979
TCGA-AR-A24U	BRCA	[ 0. 1. 0. 0. 0. 0. 0. 1. 0. 0. 0. 0. 0. 0. 0. 0. 0.]	2 (positive); 8 (positive);	ramucirumab, erlotinib/ramucirumab	non-TNBC	1.14863	0.19268	-0.335589
TCGA-AR-A24V	BRCA	[-1. 1. -1. 0. 0. 0. 0. 0. 0. 0. 0. 0. 0. 0. 0. 0. 0.]	1 (negative); 2 (positive); 3 (negative);	erlotinib, ramucirumab, tamoxifen/enzalutamide	non-TNBC	0.401844	0.744267	-0.509806
TCGA-AR-A24W	BRCA	[-1. 1. -1. -1. 0. 0. 0. 0. 0. 0. 0. 0. 0. 0. 0. 0. 0.]	1 (negative); 2 (positive); 3 (negative); 4 (negative);	erlotinib, ramucirumab, tamoxifen/enzalutamide, *	non-TNBC	0.550308	1.73811	-0.185572
TCGA-AR-A24X	BRCA	[-1. 1. -1. 0. 0. 0. 0. 0. 0. 0. 0. 0. 0. 0. 0. 0. 0.]	1 (negative); 2 (positive); 3 (negative);	erlotinib, ramucirumab, tamoxifen/enzalutamide	non-TNBC	1.95629	1.0292	-0.442943
TCGA-AR-A24Z	BRCA	[ 0. 1. -1. 0. 0. 0. 0. 0. 0. 0. 0. 0. 0. 0. 0. 0. 0.]	2 (positive); 3 (negative);	ramucirumab, tamoxifen/enzalutamide	non-TNBC	-0.431033	-0.108565	-0.775049
TCGA-AR-A250	BRCA	[-1. 1. -1. 0. 0. 0. 0. 0. 1. 0. 0. 0. 0. 0. 0. 0. 0.]	1 (negative); 2 (positive); 3 (negative); 9 (positive);	erlotinib, ramucirumab, tamoxifen/enzalutamide, tamoxifen	non-TNBC	2.30506	0.713916	-0.365317
TCGA-AR-A251	BRCA	[ 0. 0. 0. 0. 0. 0. 0. 0. 0. 0. 0. 0. 0. 0. 0. 0. 0.]			non-TNBC	0.353669	0.897418	-0.288278
TCGA-AR-A252	BRCA	[ 0. 1. -1. 0. 0. 0. 0. 0. 0. 0. 0. 0. 0. 0. 0. 0. 0.]	2 (positive); 3 (negative);	ramucirumab, tamoxifen/enzalutamide	non-TNBC	0.228985	0.333077	-0.604341
TCGA-AR-A254	BRCA	[ 0. 1. -1. 0. 0. 0. 0. 0. 0. 0. 0. 0. 0. 0. 0. 0. 0.]	2 (positive); 3 (negative);	ramucirumab, tamoxifen/enzalutamide	non-TNBC	1.27634	-0.0475219	-0.619356
TCGA-AR-A255	BRCA	[-1. 0. -1. 0. 0. 0. 0. 0. 0. 0. 0. 0. 0. 0. 0. 0. 0.]	1 (negative); 3 (negative);	erlotinib, tamoxifen/enzalutamide	non-TNBC	1.33286	0.850674	0.123915
TCGA-AR-A256	BRCA	[ 0. 1. 0. 0. 0. 0. 0. 0. 0. 0. 0. 0. 0. 0. 0. 0. 0.]	2 (positive);	ramucirumab	non-TNBC	-0.235203	-0.000687114	-0.323224
TCGA-AR-A2LE	BRCA	[-1. 0. -1. -1. 0. 0. 0. -1. 0. 0. 0. 0. 0. 0. 0. 0. 0.]	1 (negative); 3 (negative); 4 (negative); 8 (negative);	erlotinib, tamoxifen/enzalutamide, *, tamoxifen	TNBC	0.737734	1.21937	0.553997
TCGA-AR-A2LH	BRCA	[ 0. 0. 0. 0. 0. 0. 0. 0. 0. 0. 0. 0. 0. 0. -1. 0. 0.]	15 (negative);	*	non-TNBC	0.0418171	0.163318	-0.14829
TCGA-AR-A2LJ	BRCA	[-1. 0. -1. 0. 0. 0. 0. 0. 0. 0. 0. 0. 0. 0. 0. 0. 0.]	1 (negative); 3 (negative);	erlotinib, tamoxifen/enzalutamide	non-TNBC	0.659835	0.0849893	-0.100312
TCGA-AR-A2LK	BRCA	[ 0. 0. -1. 0. 0. 0. 0. 0. 0. 0. 0. 0. 0. 0. 0. 0. 0.]	3 (negative);	tamoxifen/enzalutamide	non-TNBC	-0.076166	-0.248257	-0.71157
TCGA-AR-A2LL	BRCA	[ 0. 0. -1. 0. 0. 0. 0. 0. 0. 0. 0. 0. 0. 0. 0. 0. 0.]	3 (negative);	tamoxifen/enzalutamide	non-TNBC	1.07108	-0.162204	-0.501471
TCGA-AR-A2LM	BRCA	[ 0. 1. -1. 0. 0. 0. 0. 0. 0. 0. 0. 0. 0. 0. 0. 0. 0.]	2 (positive); 3 (negative);	ramucirumab, tamoxifen/enzalutamide	non-TNBC	0.151576	0.101735	-0.314232
TCGA-AR-A2LN	BRCA	[-1. 0. -1. -1. 0. 0. 0. 0. 0. 0. 0. 0. 0. 0. 0. 0. 0.]	1 (negative); 3 (negative); 4 (negative);	erlotinib, tamoxifen/enzalutamide, *	non-TNBC	0.463537	0.365068	0.419832
TCGA-AR-A2LO	BRCA	[ 0. 0. -1. 0. 0. 0. 0. 0. 0. 0. 0. 0. 0. 0. 0. 0. 0.]	3 (negative);	tamoxifen/enzalutamide	non-TNBC	0.159422	-0.0348393	-0.413917
TCGA-AR-A2LQ	BRCA	[-1. 0. -1. 0. 0. 0. 0. 0. 0. 0. 0. 0. 0. 0. 0. 0. 0.]	1 (negative); 3 (negative);	erlotinib, tamoxifen/enzalutamide	non-TNBC	0.990386	0.18623	0.124642
TCGA-AR-A2LR	BRCA	[ 0. 0. 0. 0. 0. 0. 0. 0. 0. 0. 0. 0. 0. 0. 0. 0. 0.]			non-TNBC	0.817039	0.163714	0.0200631
TCGA-B6-A0I2	BRCA	[-1. 0. -1. -1. 0. 0. 0. 0. 0. 0. 0. 0. 0. 0. 0. 0. 0.]	1 (negative); 3 (negative); 4 (negative);	erlotinib, tamoxifen/enzalutamide, *	non-TNBC	0.800374	0.411207	0.592363
TCGA-B6-A0I6	BRCA	[ 0. 0. 0. 0. 0. 0. 0. 0. 0. 0. 0. 0. 0. 0. 0. 0. 0.]			non-TNBC	0.155883	-0.110547	-0.249207
TCGA-B6-A0I8	BRCA	[ 0. 0. -1. 0. 0. 0. 0. 0. 0. 0. 0. 0. 0. 0. 0. 0. 0.]	3 (negative);	tamoxifen/enzalutamide	non-TNBC	0.512171	0.107686	-0.272438
TCGA-B6-A0I9	BRCA	[ 0. 0. -1. 0. -1. 0. 0. 0. 0. 0. 0. 0. 0. 0. 0. 0. 0.]	3 (negative); 5 (negative);	tamoxifen/enzalutamide, erlotinib/dasatinib	non-TNBC	3.61537	-0.0334626	-0.311326
TCGA-B6-A0IB	BRCA	[ 0. 0. -1. 0. 0. 0. 0. 0. 1. 0. 0. 0. 0. 0. 0. 0. 0.]	3 (negative); 9 (positive);	tamoxifen/enzalutamide, tamoxifen	non-TNBC	-0.158271	-0.000682343	-0.658271
TCGA-B6-A0IG	BRCA	[ 0. 0. -1. 0. 0. 0. 0. 0. 0. 0. 0. 0. 0. 0. 0. 0. 0.]	3 (negative);	tamoxifen/enzalutamide	non-TNBC	0.679419	0.0660479	-0.343316
TCGA-B6-A0IJ	BRCA	[ 0. 0. 0. 0. 0. 0. 0. 0. 0. 0. 0. 0. 0. 0. 0. 0. 0.]			non-TNBC	-0.0245116	0.0941081	0.0292928
TCGA-B6-A0IK	BRCA	[-1. 0. -1. -1. 0. 0. 0. 0. 0. 0. 0. 0. 0. 0. 0. 0. 0.]	1 (negative); 3 (negative); 4 (negative);	erlotinib, tamoxifen/enzalutamide, *	non-TNBC	0.545439	0.915523	0.101976
TCGA-B6-A0IO	BRCA	[ 0. 1. -1. 0. 0. 0. 0. 0. 0. 0. 0. 0. 0. 0. 0. 0. 0.]	2 (positive); 3 (negative);	ramucirumab, tamoxifen/enzalutamide	non-TNBC	-0.233245	-0.0919188	-0.350556
TCGA-B6-A0IQ	BRCA	[ 0. 0. 0. 0. 0. 0. 0. 0. 0. 0. 0. 0. 0. 0. 0. 0. 0.]			non-TNBC	-0.515865	-0.225085	-0.343316
TCGA-B6-A0RG	BRCA	[ 0. 0. -1. 0. 0. 0. 0. 0. 0. 0. 0. 0. 0. 0. 0. 0. 0.]	3 (negative);	tamoxifen/enzalutamide	non-TNBC	0.0836438	0.249933	-0.340513
TCGA-B6-A0RH	BRCA	[ 0. 0. 0. 0. 0. 0. 0. 0. 0. 0. 0. 0. 0. 0. 0. 0. 0.]			TNBC	0.621657	0.920102	0.0580972
TCGA-B6-A0RL	BRCA	[ 0. 0. -1. 0. 0. 0. 0. 0. 0. 0. 0. 0. 0. 0. 0. 0. 0.]	3 (negative);	tamoxifen/enzalutamide	non-TNBC	-0.194233	-0.236899	-0.417919
TCGA-B6-A0RM	BRCA	[ 0. 0. -1. 0. 0. 0. 0. 0. 0. 0. 0. 0. 0. 0. 0. 0. 0.]	3 (negative);	tamoxifen/enzalutamide	non-TNBC	0.0830598	-0.0928729	-0.304585
TCGA-B6-A0RN	BRCA	[-1. 1. -1. 0. 0. 0. 0. 0. 0. 0. 0. 0. 0. 0. 0. 0. 0.]	1 (negative); 2 (positive); 3 (negative);	erlotinib, ramucirumab, tamoxifen/enzalutamide	non-TNBC	0.0448031	0.364901	-0.185202
TCGA-B6-A0RO	BRCA	[ 0. 0. -1. 0. 0. 0. 0. 0. 0. 0. 0. 0. 0. 0. 0. 0. 0.]	3 (negative);	tamoxifen/enzalutamide	TNBC	0.0413768	0.129094	-0.310832
TCGA-B6-A0RP	BRCA	[ 0. 0. -1. 0. 0. 0. 0. 0. 0. 0. 0. 0. 0. 0. 0. 0. 0.]	3 (negative);	tamoxifen/enzalutamide	non-TNBC	0.215239	0.0270896	-0.423219
TCGA-B6-A0RQ	BRCA	[-1. 0. -1. 0. 0. 0. 0. 0. 0. 0. 0. 0. 0. 0. 0. 0. 0.]	1 (negative); 3 (negative);	erlotinib, tamoxifen/enzalutamide	non-TNBC	0.0558222	0.0426057	-0.165031
TCGA-B6-A0RT	BRCA	[ 0. 0. 0. -1. 0. 0. 0. 0. 0. 0. 0. 0. 0. 0. 0. 0. 0.]	4 (negative);	*	non-TNBC	0.353329	0.278781	0.1826
TCGA-B6-A0RU	BRCA	[ 0. 0. 0. 0. 0. 0. 0. 0. 0. 0. 0. 0. 0. 0. 0. 0. 0.]			non-TNBC	0.26011	0.117211	-0.153183
TCGA-B6-A0RV	BRCA	[ 0. 0. -1. 0. 0. 0. 0. 0. 0. 0. 0. 0. 0. 0. 0. 0. 0.]	3 (negative);	tamoxifen/enzalutamide	non-TNBC	0.0468936	0.299689	-0.335211
TCGA-B6-A0WX	BRCA	[-1. 0. 0. 0. 0. 0. 0. 0. 0. 0. 0. 0. 0. 0. 0. 0. 0.]	1 (negative);	erlotinib	non-TNBC	-0.13316	0.278553	-0.00115126
TCGA-B6-A0X0	BRCA	[ 0. 1. -1. 0. 0. 0. 0. 0. 0. 0. 0. 0. 0. 0. 0. 0. 0.]	2 (positive); 3 (negative);	ramucirumab, tamoxifen/enzalutamide	non-TNBC	-0.159074	-0.012567	-0.633971
TCGA-B6-A0X1	BRCA	[ 0. 0. 0. 0. 0. 0. 0. 0. 0. 0. 0. 0. 0. 0. 0. 0. 0.]			non-TNBC	0.0530852	0.0813972	-0.27017
TCGA-B6-A2IU	BRCA	[ 0. 0. -1. 0. 0. 0. 0. 0. 0. 0. 0. 0. 0. 0. 0. 0. 0.]	3 (negative);	tamoxifen/enzalutamide	non-TNBC	-0.0956052	-0.100946	-0.44547
TCGA-BH-A0AU	BRCA	[ 0. 0. -1. 0. 0. 0. 0. 0. 0. 0. 0. 0. 0. 0. 0. 0. 0.]	3 (negative);	tamoxifen/enzalutamide	non-TNBC	0.100385	-0.0294813	-0.227022
TCGA-BH-A0AV	BRCA	[ 0. 0. 0. 0. 0. 0. 0. 0. 0. 0. 0. 0. 0. 0. 0. 0. 0.]			non-TNBC	0.198092	0.122794	0.131181
TCGA-BH-A0AY	BRCA	[ 0. 1. -1. 0. 0. 0. 0. 0. 0. 0. 0. 0. 0. 0. 0. 0. 0.]	2 (positive); 3 (negative);	ramucirumab, tamoxifen/enzalutamide	TNBC	0.0901808	0.23265	-0.182099
TCGA-BH-A0AZ	BRCA	[ 0. 0. -1. 0. 0. 0. 0. 0. 0. 0. 0. 0. 0. 0. 0. 0. 0.]	3 (negative);	tamoxifen/enzalutamide	non-TNBC	-0.0684669	0.444698	0.0581518
TCGA-BH-A0B0	BRCA	[-1. 0. -1. 0. 0. 0. 0. 0. 0. 0. 0. 0. 0. 0. 0. 0. 0.]	1 (negative); 3 (negative);	erlotinib, tamoxifen/enzalutamide	non-TNBC	0.556746	0.0731679	-0.220706
TCGA-BH-A0B1	BRCA	[ 0. 1. -1. 0. 0. 0. 0. 0. 0. 0. 0. 0. 0. 0. 0. 0. 0.]	2 (positive); 3 (negative);	ramucirumab, tamoxifen/enzalutamide	TNBC	-0.0528302	-0.154054	-0.203842
TCGA-BH-A0B2	BRCA	[ 0. 0. -1. 0. 0. 0. 0. 0. 0. 0. 0. 0. 0. 0. 0. 0. 0.]	3 (negative);	tamoxifen/enzalutamide	non-TNBC	0.236595	-0.226549	-0.397255
TCGA-BH-A0B3	BRCA	[ 0. 0. 0. 0. 0. 0. 0. 0. 0. 0. 0. 0. 0. 0. 0. 0. 0.]			non-TNBC	-0.0492751	-0.0878847	-0.101672
TCGA-BH-A0B4	BRCA	[ 0. 1. -1. 0. 0. 0. 0. 0. 0. 0. 0. 0. 0. 0. 0. 0. 0.]	2 (positive); 3 (negative);	ramucirumab, tamoxifen/enzalutamide	non-TNBC	0.13054	0.208189	-0.197519
TCGA-BH-A0B5	BRCA	[-1. 0. -1. -1. 0. 0. 0. 0. 0. 0. 0. 0. 0. 0. 0. 0. 0.]	1 (negative); 3 (negative); 4 (negative);	erlotinib, tamoxifen/enzalutamide, *	non-TNBC	0.253095	0.568656	0.0292689
TCGA-BH-A0B6	BRCA	[ 0. 0. -1. 0. 0. 0. 0. 0. 0. 0. 0. 0. 0. 0. 0. 0. 0.]	3 (negative);	tamoxifen/enzalutamide	non-TNBC	0.329925	-0.00394148	-0.111483
TCGA-BH-A0B7	BRCA	[ 0. 1. -1. 0. 0. 0. 0. 0. 0. 0. 0. 0. 0. 0. 0. 0. 0.]	2 (positive); 3 (negative);	ramucirumab, tamoxifen/enzalutamide	non-TNBC	0.377091	-0.017415	-0.187967
TCGA-BH-A0B9	BRCA	[ 0. 0. 0. 0. 0. 0. 0. 0. 0. 0. 0. 0. 0. 0. 0. 0. 0.]			non-TNBC	-0.108192	-0.203784	-0.124325
TCGA-BH-A0BA	BRCA	[-1. 0. -1. 0. 0. 0. 0. 0. 0. 0. 0. 0. 0. 0. 0. 0. 0.]	1 (negative); 3 (negative);	erlotinib, tamoxifen/enzalutamide	non-TNBC	0.66687	0.565318	0.102608
TCGA-BH-A0BC	BRCA	[ 0. 0. -1. 0. 0. 0. 0. 0. 0. 0. 0. 0. 0. 0. 0. 0. 0.]	3 (negative);	tamoxifen/enzalutamide	non-TNBC	0.490192	0.103094	-0.210843
TCGA-BH-A0BF	BRCA	[ 0. 1. 0. 0. 0. 0. 0. 0. 0. 0. 0. 0. 0. 0. 0. 0. 0.]	2 (positive);	ramucirumab	non-TNBC	-0.211339	-0.134025	-0.269507
TCGA-BH-A0BJ	BRCA	[ 0. 1. -1. 0. 0. 0. 0. 0. 0. 0. 0. 0. 0. 0. 0. 0. 0.]	2 (positive); 3 (negative);	ramucirumab, tamoxifen/enzalutamide	non-TNBC	-0.0091463	0.0798075	-0.183285
TCGA-BH-A0BM	BRCA	[ 0. 1. -1. 0. 0. 0. 0. 0. 0. 0. 0. 0. 0. 0. 0. 0. 0.]	2 (positive); 3 (negative);	ramucirumab, tamoxifen/enzalutamide	non-TNBC	0.0218818	0.111134	-0.382723
TCGA-BH-A0BO	BRCA	[-1. 0. -1. 0. 0. 0. 0. 0. 0. 0. 0. 0. 0. 0. 0. 0. 0.]	1 (negative); 3 (negative);	erlotinib, tamoxifen/enzalutamide	non-TNBC	0.0300873	0.100229	-0.0850044
TCGA-BH-A0BP	BRCA	[ 0. 0. -1. 0. 0. 0. 0. 0. 0. 0. 0. 0. 0. 0. 0. 0. 0.]	3 (negative);	tamoxifen/enzalutamide	non-TNBC	0.36017	0.161867	-0.19837
TCGA-BH-A0BQ	BRCA	[ 0. 1. -1. 0. 0. 0. 0. 0. 0. 0. 0. 0. 0. 0. 0. 0. 0.]	2 (positive); 3 (negative);	ramucirumab, tamoxifen/enzalutamide	non-TNBC	0.266775	0.100504	-0.39086
TCGA-BH-A0BR	BRCA	[ 0. 1. 0. 0. 0. 0. 0. 0. 0. 0. 0. 0. 0. 0. 0. 0. 0.]	2 (positive);	ramucirumab	non-TNBC	-0.372823	-0.0797177	-0.115107
TCGA-BH-A0BS	BRCA	[ 0. 1. -1. 0. 0. 0. 0. 0. 0. 0. 0. 0. 0. 0. 0. 0. 0.]	2 (positive); 3 (negative);	ramucirumab, tamoxifen/enzalutamide	non-TNBC	-0.0602123	0.0602181	-0.628811
TCGA-BH-A0BT	BRCA	[ 0. 0. -1. 0. 0. 0. 0. 0. 0. 0. 0. 0. 0. 0. 0. 0. 0.]	3 (negative);	tamoxifen/enzalutamide	non-TNBC	0.313132	0.385286	-0.325877
TCGA-BH-A0BV	BRCA	[ 0. 1. -1. 0. 0. 0. 0. 0. 0. 0. 0. 0. 0. 0. 0. 0. 0.]	2 (positive); 3 (negative);	ramucirumab, tamoxifen/enzalutamide	non-TNBC	-0.54018	-0.0841455	-0.555396
TCGA-BH-A0BW	BRCA	[ 0. 0. 0. 0. 0. 0. 1. 0. 0. 0. 0. 0. 0. 0. 0. -1. 0.]	7 (positive); 16 (negative);	dasatinib, trastuzumab	TNBC	0.261269	-0.12653	-0.219816
TCGA-BH-A0BZ	BRCA	[ 0. 0. -1. 0. 0. 0. 0. 0. 0. 0. 0. 0. 0. 0. 0. 0. 0.]	3 (negative);	tamoxifen/enzalutamide	TNBC	-0.112385	-0.0125044	-0.522472
TCGA-BH-A0C0	BRCA	[ 0. 1. -1. 0. 0. 0. 0. 0. 0. 0. 0. 0. 0. 0. 0. 0. 0.]	2 (positive); 3 (negative);	ramucirumab, tamoxifen/enzalutamide	non-TNBC	0.170485	-0.0617201	-0.41518
TCGA-BH-A0C1	BRCA	[-1. 0. -1. -1. 0. 0. 0. 0. 0. 0. 0. 0. 0. 0. 0. 0. 0.]	1 (negative); 3 (negative); 4 (negative);	erlotinib, tamoxifen/enzalutamide, *	non-TNBC	-0.140204	1.0973	0.341125
TCGA-BH-A0C3	BRCA	[ 0. 0. -1. 0. 0. 0. 0. 0. 0. 0. 0. 0. 0. 0. 0. 0. 0.]	3 (negative);	tamoxifen/enzalutamide	non-TNBC	-0.120669	-0.0749073	-0.343316
TCGA-BH-A0C7	BRCA	[ 0. 1. -1. 0. 0. 0. 0. 0. 0. 0. 0. 0. 0. 0. 0. 0. 0.]	2 (positive); 3 (negative);	ramucirumab, tamoxifen/enzalutamide	non-TNBC	-0.000377302	0.0412476	-0.301253
TCGA-BH-A0DD	BRCA	[ 0. 1. -1. 0. 0. 0. 0. 0. 0. 0. 0. 0. 0. 0. 0. 0. 0.]	2 (positive); 3 (negative);	ramucirumab, tamoxifen/enzalutamide	non-TNBC	-0.107613	-0.0471101	-0.638555
TCGA-BH-A0DG	BRCA	[-1. 0. -1. 0. 0. 0. 0. 0. 0. 0. 0. 0. 0. 0. 0. 0. 0.]	1 (negative); 3 (negative);	erlotinib, tamoxifen/enzalutamide	non-TNBC	0.132317	0.169352	-0.270554
TCGA-BH-A0DH	BRCA	[ 0. 0. -1. 0. 0. 0. 0. 0. 0. 0. 0. 0. 0. 0. 0. 0. 0.]	3 (negative);	tamoxifen/enzalutamide	non-TNBC	0.275953	0.189169	-0.249354
TCGA-BH-A0DI	BRCA	[-1. 1. -1. 0. 0. 0. 0. 0. 0. 0. 0. 0. 0. 0. 0. 0. 0.]	1 (negative); 2 (positive); 3 (negative);	erlotinib, ramucirumab, tamoxifen/enzalutamide	TNBC	0.488301	0.0177616	-0.108141
TCGA-BH-A0DK	BRCA	[ 0. 1. -1. 0. 0. 0. 0. 0. 0. 0. 0. 0. 0. 0. 0. 0. 0.]	2 (positive); 3 (negative);	ramucirumab, tamoxifen/enzalutamide	non-TNBC	-0.231374	0.02106	-0.356877
TCGA-BH-A0DL	BRCA	[ 0. 0. 0. 0. 0. 0. 0. 0. 0. 0. 0. 0. 0. 0. 0. 0. 0.]			non-TNBC	1.80309	0.131452	2.31953
TCGA-BH-A0DP	BRCA	[ 0. 0. 0. -1. 0. 0. 0. 0. 0. 0. 0. 0. 0. 0. 0. 0. 0.]	4 (negative);	*	non-TNBC	0.349517	0.450338	0.310491
TCGA-BH-A0DS	BRCA	[ 0. 1. -1. 0. 0. 0. 0. 0. 0. 0. 0. 0. 0. 0. 0. 0. 0.]	2 (positive); 3 (negative);	ramucirumab, tamoxifen/enzalutamide	non-TNBC	-0.230838	0.00956658	-0.161391
TCGA-BH-A0DT	BRCA	[ 0. 0. -1. 0. 0. 0. 0. 0. 0. 0. 0. 0. 0. 0. 0. 0. 0.]	3 (negative);	tamoxifen/enzalutamide	non-TNBC	-0.173773	0.045049	-0.465703
TCGA-BH-A0DV	BRCA	[-1. 1. -1. 0. 1. 0. 0. 0. 0. 0. 0. 0. 0. 0. 0. 0. 0.]	1 (negative); 2 (positive); 3 (negative); 5 (positive);	erlotinib, ramucirumab, tamoxifen/enzalutamide, tamoxifen	non-TNBC	-0.031677	0.397149	-0.0640957
TCGA-BH-A0E0	BRCA	[ 0. 0. 0. 0. 0. 0. 0. 0. 0. 0. 0. 0. 0. 0. 0. 0. 0.]			non-TNBC	-0.00506904	-0.0716199	0.053937
TCGA-BH-A0E1	BRCA	[-1. 1. -1. -1. 0. 0. 0. 0. 0. 0. 0. 0. 0. 0. 0. 0. 0.]	1 (negative); 2 (positive); 3 (negative); 4 (negative);	erlotinib, ramucirumab, tamoxifen/enzalutamide, *	non-TNBC	0.0486032	0.285976	-0.0382623
TCGA-BH-A0E2	BRCA	[ 0. 1. -1. 0. 0. 0. -1. 0. 0. 0. 0. 0. 0. 0. 0. 0. 0.]	2 (positive); 3 (negative); 7 (negative);	ramucirumab, tamoxifen/enzalutamide, erlotinib/tamoxifen/enzalutamide	TNBC	-0.0815729	0.117458	-0.0727188
TCGA-BH-A0E6	BRCA	[ 0. 0. 0. 0. 0. 0. 0. 0. 0. 0. 0. 0. 0. 0. 0. 0. 0.]			non-TNBC	0.332708	-0.022646	-0.0880215
TCGA-BH-A0E7	BRCA	[ 0. 0. -1. 1. 0. 0. 0. 0. 0. 0. 0. 0. 0. 0. 0. 0. 0.]	3 (negative); 4 (positive);	tamoxifen/enzalutamide, lapatinib	non-TNBC	0.213484	-0.11134	-0.692661
TCGA-BH-A0E9	BRCA	[-1. 0. -1. 0. 0. 0. 0. 0. 0. 0. 0. 0. 0. 0. 0. 0. 0.]	1 (negative); 3 (negative);	erlotinib, tamoxifen/enzalutamide	non-TNBC	0.157603	0.166546	-0.0436956
TCGA-BH-A0EA	BRCA	[-1. 1. -1. 0. 0. 0. 0. 0. 0. 0. 0. 0. 0. 0. 0. 0. 0.]	1 (negative); 2 (positive); 3 (negative);	erlotinib, ramucirumab, tamoxifen/enzalutamide	non-TNBC	0.129569	0.235781	-0.203109
TCGA-BH-A0EB	BRCA	[ 0. 0. -1. 0. 0. 0. 0. 0. 0. 0. 0. 0. 0. 0. 0. 0. 0.]	3 (negative);	tamoxifen/enzalutamide	non-TNBC	-0.0203567	-0.0628378	-0.510026
TCGA-BH-A0EE	BRCA	[ 0. 0. 0. 0. 0. 0. 0. 0. 0. 0. 0. 0. 0. 0. 0. 0. 0.]			non-TNBC	1.08324	0.161589	-0.0517244
TCGA-BH-A0EI	BRCA	[ 0. 0. -1. 0. 0. 0. 0. 0. 0. 0. 0. 0. 0. 0. 0. 0. 0.]	3 (negative);	tamoxifen/enzalutamide	non-TNBC	-0.0577227	0.0448662	-0.38647
TCGA-BH-A0GY	BRCA	[ 0. 0. -1. 0. 0. 0. 0. 0. 0. 0. 0. 0. 0. 0. 0. 0. 0.]	3 (negative);	tamoxifen/enzalutamide	non-TNBC	0.00092668	0.156129	-0.343316
TCGA-BH-A0H5	BRCA	[ 0. 0. -1. 0. 0. 0. 0. 0. 0. 0. 0. 0. 0. 0. 0. 0. 0.]	3 (negative);	tamoxifen/enzalutamide	non-TNBC	0.0431318	-0.123552	-0.459863
TCGA-BH-A0H6	BRCA	[-1. 0. -1. 0. 0. 0. 0. 0. 0. 0. 0. 0. 0. 0. 0. 0. 0.]	1 (negative); 3 (negative);	erlotinib, tamoxifen/enzalutamide	non-TNBC	0.359458	0.39567	-0.117104
TCGA-BH-A0H7	BRCA	[-1. 0. -1. -1. 0. 0. 0. 0. 0. 0. 0. 0. 0. 0. 0. 0. 0.]	1 (negative); 3 (negative); 4 (negative);	erlotinib, tamoxifen/enzalutamide, *	non-TNBC	0.499412	1.04935	0.182657
TCGA-BH-A0H9	BRCA	[ 0. 1. -1. 0. 0. 0. 0. 0. 0. 0. 0. 0. 0. 0. 0. 0. 0.]	2 (positive); 3 (negative);	ramucirumab, tamoxifen/enzalutamide	non-TNBC	-0.110318	-0.0662495	-0.539729
TCGA-BH-A0HA	BRCA	[ 0. 0. -1. 0. 0. 0. 0. 0. 0. 0. 0. 0. 0. 0. 0. 0. 0.]	3 (negative);	tamoxifen/enzalutamide	non-TNBC	-0.0443519	0.138472	-0.40081
TCGA-BH-A0HK	BRCA	[ 0. 0. -1. 0. 0. 0. 0. 0. 0. 0. 0. 0. 0. 0. 0. 0. 0.]	3 (negative);	tamoxifen/enzalutamide	TNBC	0.0674055	-0.144778	-0.476347
TCGA-BH-A0HL	BRCA	[ 0. 1. -1. 0. 0. 0. 0. 0. 0. 0. 0. 0. 0. 0. 0. 0. 0.]	2 (positive); 3 (negative);	ramucirumab, tamoxifen/enzalutamide	non-TNBC	-0.075955	-0.0236938	-0.513956
TCGA-BH-A0HN	BRCA	[-1. 0. -1. 0. 0. 0. 0. 0. 0. 0. 0. 0. 0. 0. 0. 0. 0.]	1 (negative); 3 (negative);	erlotinib, tamoxifen/enzalutamide	non-TNBC	0.14257	0.237028	-0.301006
TCGA-BH-A0HP	BRCA	[ 0. 0. -1. 0. 0. 0. 0. 0. 0. 0. 0. 0. 0. 0. 0. 0. -1.]	3 (negative);	tamoxifen/enzalutamide	non-TNBC	0.179107	0.327199	-0.343316
TCGA-BH-A0HU	BRCA	[ 0. 1. -1. 0. 0. 0. 0. 0. 0. 0. 0. 0. 0. 0. 0. 0. 0.]	2 (positive); 3 (negative);	ramucirumab, tamoxifen/enzalutamide	non-TNBC	-0.141266	-0.0856035	-0.560728
TCGA-BH-A0HW	BRCA	[ 0. 1. -1. 1. 0. 0. 0. 0. 0. 0. 0. 0. 0. 0. 0. 0. 0.]	2 (positive); 3 (negative); 4 (positive);	ramucirumab, tamoxifen/enzalutamide, lapatinib	TNBC	0.157556	-0.0322927	-0.602142
TCGA-BH-A0HX	BRCA	[ 0. 1. -1. 0. 0. 0. 0. 0. 0. 0. 0. 0. 0. 0. 0. 0. 0.]	2 (positive); 3 (negative);	ramucirumab, tamoxifen/enzalutamide	non-TNBC	0.0877808	-0.0448084	-0.343316
TCGA-BH-A0HY	BRCA	[-1. 0. -1. -1. 0. 0. 0. 0. 0. 0. 0. 0. 0. 0. 0. 0. 0.]	1 (negative); 3 (negative); 4 (negative);	erlotinib, tamoxifen/enzalutamide, *	non-TNBC	1.18766	0.69294	0.0194677
TCGA-BH-A0RX	BRCA	[-1. 0. -1. -1. 0. 0. 0. 0. 0. 0. 0. 0. 0. 0. 0. 0. 0.]	1 (negative); 3 (negative); 4 (negative);	erlotinib, tamoxifen/enzalutamide, *	non-TNBC	0.209588	0.686119	0.420465
TCGA-BH-A0W4	BRCA	[ 0. 0. -1. 0. 0. 0. 0. 0. 0. 0. 0. 0. 0. 0. 0. 0. 0.]	3 (negative);	tamoxifen/enzalutamide	non-TNBC	0.173297	-0.0501014	-0.383674
TCGA-BH-A0W5	BRCA	[ 0. 0. -1. 0. 0. 0. 0. 0. 0. 0. 0. 0. 0. 0. 0. 0. 0.]	3 (negative);	tamoxifen/enzalutamide	non-TNBC	0.500321	-0.116021	-0.385936
TCGA-BH-A18F	BRCA	[ 0. 0. -1. 0. 0. 0. 0. 0. 0. 0. 0. 0. 0. 0. 0. 0. 0.]	3 (negative);	tamoxifen/enzalutamide	non-TNBC	-0.463345	-0.116801	-0.131802
TCGA-BH-A18G	BRCA	[ 0. 0. 0. 0. 0. 0. 0. 0. 0. 0. 0. 0. 0. 0. 0. 0. 0.]			TNBC	-0.126594	-0.0905545	-0.209785
TCGA-BH-A18H	BRCA	[ 0. 1. -1. 0. 0. 0. 0. 0. 0. 0. 0. 0. 0. 0. 0. 0. 0.]	2 (positive); 3 (negative);	ramucirumab, tamoxifen/enzalutamide	non-TNBC	-0.0266138	-0.235034	-0.206467
TCGA-BH-A18J	BRCA	[-1. 0. -1. 0. 0. 0. 0. 0. 0. 0. 0. 0. 0. 0. 0. 0. 0.]	1 (negative); 3 (negative);	erlotinib, tamoxifen/enzalutamide	non-TNBC	-0.168946	0.319165	-0.234722
TCGA-BH-A18L	BRCA	[ 0. 0. -1. 0. 0. 0. 0. 0. 0. 0. 0. 0. 0. 0. 0. 0. 0.]	3 (negative);	tamoxifen/enzalutamide	non-TNBC	0.0856939	0.138429	-0.0870127
TCGA-BH-A18M	BRCA	[ 0. 0. -1. 0. 0. 0. 0. 0. 0. 0. 0. 0. 0. 0. 0. 0. 0.]	3 (negative);	tamoxifen/enzalutamide	non-TNBC	0.0626024	-0.0557615	-0.334317
TCGA-BH-A18N	BRCA	[ 0. 0. -1. 0. 0. 0. 0. 0. 0. 0. 0. 0. 0. 0. 0. 0. 0.]	3 (negative);	tamoxifen/enzalutamide	TNBC	-0.00257013	-0.0824834	-0.481102
TCGA-BH-A18P	BRCA	[ 0. 0. -1. 0. 0. 0. 0. 1. 0. 0. 0. 0. 0. 0. 0. 0. 0.]	3 (negative); 8 (positive);	tamoxifen/enzalutamide, erlotinib/ramucirumab	non-TNBC	0.464899	-0.228692	-0.512048
TCGA-BH-A18Q	BRCA	[ 0. 0. 0. 0. 0. 0. 0. 0. 0. 0. 0. 0. 0. 0. 0. 0. 0.]			non-TNBC	0.218656	-0.0860613	-0.378036
TCGA-BH-A18R	BRCA	[ 0. 0. 0. 0. 0. 0. 0. 0. 0. 0. 0. 0. 0. 0. 0. 0. 0.]			non-TNBC	2.37344	-0.0488296	-0.10533
TCGA-BH-A18S	BRCA	[ 0. 0. -1. 1. 0. 0. 0. 0. 0. 0. 0. 0. 0. 0. 0. 0. 0.]	3 (negative); 4 (positive);	tamoxifen/enzalutamide, lapatinib	non-TNBC	0.0601063	0.0898636	-0.388704
TCGA-BH-A18T	BRCA	[ 0. 0. 0. 0. 0. 0. 0. 0. 0. 0. 0. 0. 0. 0. 0. 0. 0.]			TNBC	0.029061	0.0183449	0.0389086
TCGA-BH-A18U	BRCA	[-1. 0. -1. 0. 0. 0. 0. 0. 0. 0. 0. 0. 0. 0. 0. 0. 0.]	1 (negative); 3 (negative);	erlotinib, tamoxifen/enzalutamide	non-TNBC	0.906521	0.348595	0.678775
TCGA-BH-A18V	BRCA	[ 0. 0. 0. 0. 0. 0. 0. 0. 0. 0. 0. 0. 0. 0. 0. 0. 0.]			non-TNBC	0.745936	-0.0746682	0.67304
TCGA-BH-A1EN	BRCA	[ 0. 0. 0. 0. -1. 0. 0. 0. 0. 0. 0. 0. 1. 0. 0. 0. 0.]	5 (negative); 13 (positive);	erlotinib/dasatinib, erlotinib	non-TNBC	4.28101	0.477561	-0.173282
TCGA-BH-A1EO	BRCA	[-1. 0. -1. 0. 0. 1. 0. 0. 0. 0. 0. 0. 0. 0. 0. 0. 0.]	1 (negative); 3 (negative); 6 (positive);	erlotinib, tamoxifen/enzalutamide, tamoxifen	non-TNBC	0.211314	0.73567	-0.528439
TCGA-BH-A1ES	BRCA	[ 0. 0. -1. 0. 0. 0. 0. 0. 0. 0. 0. 0. 0. 0. 0. 0. 0.]	3 (negative);	tamoxifen/enzalutamide	non-TNBC	0.317028	0.0373019	-0.0559097
TCGA-BH-A1ET	BRCA	[ 0. 1. -1. 0. 0. 0. 0. 0. 0. 0. 0. 0. 0. 0. 0. 0. 0.]	2 (positive); 3 (negative);	ramucirumab, tamoxifen/enzalutamide	non-TNBC	0.0437131	0.201558	-0.551047
TCGA-BH-A1EU	BRCA	[ 0. 0. -1. 0. 0. 0. 0. 0. 1. 0. 0. 0. 0. 0. 0. 0. 0.]	3 (negative); 9 (positive);	tamoxifen/enzalutamide, tamoxifen	non-TNBC	0.361053	0.190441	-0.796798
TCGA-BH-A1EV	BRCA	[ 0. 0. 0. 1. 0. 0. 0. 0. 0. 0. 0. 0. 0. 0. 0. 0. 0.]	4 (positive);	lapatinib	non-TNBC	3.72986	0.0684416	-0.304662
TCGA-BH-A1EW	BRCA	[ 0. 0. -1. 0. 0. 0. 0. 0. 0. 0. 0. 0. 0. 0. 0. 0. 0.]	3 (negative);	tamoxifen/enzalutamide	non-TNBC	0.129234	0.534387	-0.690934
TCGA-BH-A1EX	BRCA	[-1. 0. -1. 0. 0. 0. 0. 0. 0. 0. 0. 0. 0. 0. 0. 0. 0.]	1 (negative); 3 (negative);	erlotinib, tamoxifen/enzalutamide	non-TNBC	1.41114	0.826653	-0.535171
TCGA-BH-A1EY	BRCA	[ 0. 0. -1. 0. 0. 0. 0. 0. 0. 0. 0. 0. 0. 0. 0. 0. 0.]	3 (negative);	tamoxifen/enzalutamide	non-TNBC	0.215913	1.163	-0.36954
TCGA-BH-A1F0	BRCA	[ 0. 0. 0. 0. 0. 0. 0. 0. 0. 0. 0. 0. 0. 0. 0. 0. 0.]			non-TNBC	0.338028	-0.0168427	-0.385469
TCGA-BH-A1F2	BRCA	[-1. 1. -1. 0. 0. 0. 0. 0. 0. 0. 0. 0. 0. 0. 0. 0. 0.]	1 (negative); 2 (positive); 3 (negative);	erlotinib, ramucirumab, tamoxifen/enzalutamide	non-TNBC	3.72629	0.0166285	-0.618801
TCGA-BH-A1F5	BRCA	[ 0. 0. -1. 1. 0. 0. 0. 0. 0. 0. 0. 0. 0. 0. 0. 0. 0.]	3 (negative); 4 (positive);	tamoxifen/enzalutamide, lapatinib	non-TNBC	-0.341062	-0.362852	-0.754704
TCGA-BH-A1F6	BRCA	[-1. 0. 0. 0. 0. 0. 0. 0. 0. 0. 0. 0. 0. 0. 0. 0. 0.]	1 (negative);	erlotinib	non-TNBC	0.191777	0.599805	-0.134764
TCGA-BH-A1F8	BRCA	[ 0. 0. -1. 0. 0. 0. 0. 0. 0. 0. 0. 0. 0. 0. 0. 0. 0.]	3 (negative);	tamoxifen/enzalutamide	non-TNBC	0.073559	-0.254047	-0.383476
TCGA-BH-A1FB	BRCA	[-1. 0. -1. 0. 0. 0. 0. 0. 0. 0. 0. 0. 0. 0. 0. 0. 0.]	1 (negative); 3 (negative);	erlotinib, tamoxifen/enzalutamide	non-TNBC	0.13665	0.761634	-0.429119
TCGA-BH-A1FC	BRCA	[ 0. 0. 0. 0. 0. 0. 0. 0. 0. 0. 0. 0. 0. 0. 0. 0. 0.]			non-TNBC	-0.443453	0.0583538	-0.41689
TCGA-BH-A1FD	BRCA	[ 0. 0. -1. 0. 0. 0. 0. 0. 0. 0. 0. 0. 0. 0. 0. 0. 0.]	3 (negative);	tamoxifen/enzalutamide	non-TNBC	-0.261054	0.0191883	-0.743904
TCGA-BH-A1FE	BRCA	[-1. 0. 0. 0. 0. -1. 0. 0. 0. 0. 0. 0. 0. 0. 0. 0. 0.]	1 (negative); 6 (negative);	erlotinib, *	non-TNBC	0.260066	0.00217855	0.0883914
TCGA-BH-A1FG	BRCA	[ 0. 0. -1. 0. 0. 1. 0. 0. 0. 0. 0. 0. 0. 0. 0. 0. 0.]	3 (negative); 6 (positive);	tamoxifen/enzalutamide, tamoxifen	non-TNBC	-0.11849	-0.212119	-0.496951
TCGA-BH-A1FH	BRCA	[-1. 0. -1. -1. 0. 0. 0. 0. 0. 0. 0. 0. 0. 0. 0. 0. 0.]	1 (negative); 3 (negative); 4 (negative);	erlotinib, tamoxifen/enzalutamide, *	non-TNBC	0.327273	0.571386	0.166514
TCGA-BH-A1FJ	BRCA	[ 0. 1. -1. 0. 0. 0. 0. 0. 0. 0. 0. 0. 0. 0. 0. 0. 0.]	2 (positive); 3 (negative);	ramucirumab, tamoxifen/enzalutamide	non-TNBC	-0.369547	0.109654	-0.463754
TCGA-BH-A1FL	BRCA	[-1. 0. -1. 0. 1. 0. 0. 0. 0. 0. 0. 0. 0. 0. 0. 0. 0.]	1 (negative); 3 (negative); 5 (positive);	erlotinib, tamoxifen/enzalutamide, tamoxifen	TNBC	0.300165	0.274352	-0.261117
TCGA-BH-A1FM	BRCA	[ 0. 1. -1. 0. 0. 0. 0. 0. 0. 0. 0. 0. 0. 0. 0. 0. 0.]	2 (positive); 3 (negative);	ramucirumab, tamoxifen/enzalutamide	non-TNBC	-0.451741	0.338816	-0.604821
TCGA-BH-A1FN	BRCA	[ 0. 0. -1. 0. 0. 0. 0. 0. 0. 0. 0. 0. 0. 0. 0. 0. 0.]	3 (negative);	tamoxifen/enzalutamide	non-TNBC	0.143573	0.235992	-0.667399
TCGA-BH-A1FR	BRCA	[ 0. 0. -1. 0. 0. 0. 0. 0. 0. 0. 0. 0. 0. 0. 0. 0. 0.]	3 (negative);	tamoxifen/enzalutamide	non-TNBC	-0.0548903	0.0926037	-0.492222
TCGA-BH-A201	BRCA	[ 0. 1. -1. 0. 0. 0. 0. 0. 0. 0. 0. 0. 0. 0. 0. 0. 0.]	2 (positive); 3 (negative);	ramucirumab, tamoxifen/enzalutamide	non-TNBC	0.778279	0.29672	-0.629329
TCGA-BH-A202	BRCA	[ 0. 0. -1. 0. 0. 0. 0. 0. 0. 0. 0. 0. 0. 0. 0. 0. 0.]	3 (negative);	tamoxifen/enzalutamide	non-TNBC	0.20487	-0.0212492	-0.405329
TCGA-BH-A203	BRCA	[ 0. 0. 0. 0. 0. 0. 0. 0. 0. 0. 0. 0. 0. 0. 0. 0. 0.]			non-TNBC	0.0221925	-0.0215776	-0.250139
TCGA-BH-A204	BRCA	[ 0. 1. -1. 0. 0. 0. -1. 0. 0. 0. 0. 0. 0. 0. 0. 0. 0.]	2 (positive); 3 (negative); 7 (negative);	ramucirumab, tamoxifen/enzalutamide, erlotinib/tamoxifen/enzalutamide	non-TNBC	-0.0417455	0.122654	-0.329068
TCGA-BH-A208	BRCA	[ 0. 0. 0. 0. 0. 0. 0. 0. 0. 0. 0. 0. 0. 0. 0. 0. 0.]			non-TNBC	0.0940215	-0.00215426	0.463783
TCGA-BH-A209	BRCA	[ 1. 0. -1. 0. 0. 1. 0. 0. 0. 0. 0. 0. 0. 0. 0. 0. 0.]	1 (positive); 3 (negative); 6 (positive);	tamoxifen, tamoxifen/enzalutamide	non-TNBC	-0.342824	0.0231816	-0.524837
TCGA-BH-A28Q	BRCA	[ 0. 1. -1. 0. 0. 0. 0. 0. 0. 0. 0. 0. 0. 0. 0. 0. 0.]	2 (positive); 3 (negative);	ramucirumab, tamoxifen/enzalutamide	non-TNBC	0.182826	0.629069	-0.45202
TCGA-BH-A2L8	BRCA	[ 0. 0. -1. 0. 0. 0. 0. 0. 0. 0. 0. 0. 0. 0. 0. 0. 0.]	3 (negative);	tamoxifen/enzalutamide	non-TNBC	0.323498	-0.247573	-0.500374
TCGA-C8-A12K	BRCA	[ 0. 0. 0. 0. 0. 0. 0. 0. 0. 0. 0. 0. 0. 0. 0. 0. 0.]			non-TNBC	-0.100493	0.0257992	-0.16277
TCGA-C8-A12L	BRCA	[ 0. 0. 0. 0. 0. 0. 0. 0. 0. 0. 0. 0. 0. 0. 0. 0. 0.]			non-TNBC	0.346066	-0.0704843	0.147868
TCGA-C8-A12M	BRCA	[ 0. 1. -1. 0. 0. 0. 0. 0. 0. 0. 0. 0. 0. 0. 0. 0. 0.]	2 (positive); 3 (negative);	ramucirumab, tamoxifen/enzalutamide	non-TNBC	0.139537	-0.0152156	-0.452769
TCGA-C8-A12N	BRCA	[ 0. 0. -1. 0. 0. 0. 0. 0. 0. 0. 0. 0. -1. 0. 0. 0. 0.]	3 (negative); 13 (negative);	tamoxifen/enzalutamide, *	non-TNBC	0.0827003	0.170957	0.041825
TCGA-C8-A12O	BRCA	[ 0. 0. -1. 0. 0. 0. 0. 0. 0. 0. 0. 0. 0. 0. 0. 0. 0.]	3 (negative);	tamoxifen/enzalutamide	non-TNBC	0.00702588	-0.133777	-0.364046
TCGA-C8-A12P	BRCA	[ 0. 0. 0. 0. 0. 0. 0. 0. 0. 0. 0. 0. 0. 0. 0. 0. 0.]			non-TNBC	0.0871556	-0.00698948	-0.240739
TCGA-C8-A12Q	BRCA	[ 0. 1. 0. 0. 0. 0. 0. 0. 0. 0. 0. 0. 0. 0. 0. 0. 0.]	2 (positive);	ramucirumab	non-TNBC	0.715358	-0.13155	-0.498124
TCGA-C8-A12T	BRCA	[ 0. 1. -1. 0. 0. 0. 0. 0. 0. 0. 0. 0. 0. 0. 0. 0. 0.]	2 (positive); 3 (negative);	ramucirumab, tamoxifen/enzalutamide	non-TNBC	0.592848	0.158398	-0.264134
TCGA-C8-A12U	BRCA	[ 0. 0. -1. 0. 0. 0. 0. 0. 0. 0. 0. 0. 0. 0. 0. 0. 0.]	3 (negative);	tamoxifen/enzalutamide	non-TNBC	-0.194257	0.0589677	-0.398554
TCGA-C8-A12V	BRCA	[ 0. 0. 0. 0. 0. 0. 0. 0. 0. 0. 0. 0. 0. 0. 0. -1. 0.]	16 (negative);	trastuzumab	non-TNBC	-0.0728005	0.0595874	-0.0135838
TCGA-C8-A12W	BRCA	[ 0. 0. -1. 0. 0. 0. 0. 0. 0. 0. 0. 0. 0. 0. 0. 0. 0.]	3 (negative);	tamoxifen/enzalutamide	non-TNBC	-0.0993594	-0.0242996	-0.165805
TCGA-C8-A12X	BRCA	[ 0. 1. -1. 0. 0. 0. 0. 0. 0. 0. 0. 0. 0. 0. 0. 0. 0.]	2 (positive); 3 (negative);	ramucirumab, tamoxifen/enzalutamide	non-TNBC	0.534919	0.00611555	-0.548957
TCGA-C8-A12Y	BRCA	[ 0. 0. -1. 0. 0. 0. 0. 0. 0. 0. 0. 0. 0. 0. 0. 0. 0.]	3 (negative);	tamoxifen/enzalutamide	non-TNBC	-0.103363	-0.000443106	-0.391029
TCGA-C8-A12Z	BRCA	[ 0. 1. 0. 0. -1. 0. 0. 0. 0. 0. 0. 0. 0. 0. 0. 0. 0.]	2 (positive); 5 (negative);	ramucirumab, erlotinib/dasatinib	non-TNBC	1.46067	0.00103006	-0.140664
TCGA-C8-A130	BRCA	[ 0. 0. -1. 0. 0. 0. 0. 0. 0. 0. 0. 0. 0. 0. 0. 0. 0.]	3 (negative);	tamoxifen/enzalutamide	non-TNBC	-0.0163226	0.15626	-0.377472
TCGA-C8-A131	BRCA	[ 0. 0. 0. -1. 0. 1. 0. 0. 0. 0. 0. 0. 0. 0. 0. 0. 0.]	4 (negative); 6 (positive);	*, tamoxifen	non-TNBC	-0.242302	0.21184	0.0500942
TCGA-C8-A132	BRCA	[ 0. 1. -1. 0. 0. 0. 0. 0. 0. 0. 0. 0. 0. 0. 0. 0. 0.]	2 (positive); 3 (negative);	ramucirumab, tamoxifen/enzalutamide	non-TNBC	0.438547	-0.0257675	-0.355977
TCGA-C8-A133	BRCA	[ 0. 0. -1. 0. 0. 0. 0. 0. 0. 0. 0. 0. 0. 0. 0. 0. 0.]	3 (negative);	tamoxifen/enzalutamide	non-TNBC	0.120011	-0.00709139	-0.128478
TCGA-C8-A134	BRCA	[-1. 0. 0. 0. 0. 0. 0. 0. 0. 0. 0. 0. 0. 0. 0. 0. 0.]	1 (negative);	erlotinib	non-TNBC	-0.127319	0.118308	0.00814369
TCGA-C8-A135	BRCA	[ 0. 0. -1. 0. 0. 0. 0. 0. 0. 0. 0. 0. 0. 0. 0. 0. 0.]	3 (negative);	tamoxifen/enzalutamide	non-TNBC	1.45299	0.246665	-0.0468446
TCGA-C8-A137	BRCA	[ 0. 0. -1. 0. -1. 0. 0. 1. 0. 0. 0. 0. 0. 0. 0. 0. 0.]	3 (negative); 5 (negative); 8 (positive);	tamoxifen/enzalutamide, erlotinib/dasatinib, erlotinib/ramucirumab	non-TNBC	1.39706	0.163534	-0.323133
TCGA-C8-A138	BRCA	[ 0. 0. -1. 0. 0. 0. 0. 0. 0. 0. 0. 0. 0. 0. 0. 0. 0.]	3 (negative);	tamoxifen/enzalutamide	non-TNBC	-0.0719993	-0.056759	-0.271634
TCGA-C8-A1HE	BRCA	[ 0. 0. -1. 0. 0. 0. 0. 0. 0. 0. 0. 0. 0. 0. 0. 0. 0.]	3 (negative);	tamoxifen/enzalutamide	non-TNBC	-0.156345	0.455993	-0.63525
TCGA-C8-A1HF	BRCA	[ 0. 0. 0. 0. 0. 0. 0. 0. 0. 0. 0. 0. 0. 0. 0. -1. 0.]	16 (negative);	trastuzumab	non-TNBC	0.977296	-0.104074	-0.652891
TCGA-C8-A1HG	BRCA	[ 0. 0. 0. 0. 0. 0. -1. 0. 0. 0. 0. 0. 0. 0. 0. 0. 0.]	7 (negative);	erlotinib/tamoxifen/enzalutamide	non-TNBC	-0.297203	-0.0228126	-0.28454
TCGA-C8-A1HI	BRCA	[ 0. 1. -1. 0. 0. 0. 0. 0. 0. 0. 0. 0. 0. 0. 0. 0. 0.]	2 (positive); 3 (negative);	ramucirumab, tamoxifen/enzalutamide	non-TNBC	0.389835	0.0275257	0.319893
TCGA-C8-A1HJ	BRCA	[ 0. 0. 0. 0. 0. 0. 0. 0. 0. 0. 0. 0. 0. 0. 0. 0. 0.]			non-TNBC	-0.340406	0.178179	-0.0489235
TCGA-C8-A1HK	BRCA	[ 0. 0. -1. 0. -1. 0. 0. 0. 0. 0. 0. 0. 0. 0. 0. 0. 0.]	3 (negative); 5 (negative);	tamoxifen/enzalutamide, erlotinib/dasatinib	non-TNBC	4.54888	0.0796788	-0.490569
TCGA-C8-A1HL	BRCA	[ 0. 0. -1. 0. 0. 0. 0. 0. 0. 0. 0. 0. 0. 0. 0. 0. 0.]	3 (negative);	tamoxifen/enzalutamide	non-TNBC	0.359895	0.0469231	-0.252836
TCGA-C8-A1HM	BRCA	[ 0. 1. -1. 0. 0. 0. -1. 0. 0. 0. 0. 0. 0. 0. 0. 0. 0.]	2 (positive); 3 (negative); 7 (negative);	ramucirumab, tamoxifen/enzalutamide, erlotinib/tamoxifen/enzalutamide	non-TNBC	-0.42114	-0.0656958	-0.666943
TCGA-C8-A1HN	BRCA	[ 0. 1. 0. 0. 0. 0. -1. 0. 0. -1. 0. 0. 0. 0. 1. 0. 0.]	2 (positive); 7 (negative); 10 (negative); 15 (positive);	ramucirumab, erlotinib/tamoxifen/enzalutamide, erlotinib/tamoxifen/vemurafenib, trastuzumab	TNBC	-0.586113	0.0978893	-0.562315
TCGA-C8-A1HO	BRCA	[ 0. 0. -1. 0. 0. 0. 0. 0. 0. 0. 0. 0. 0. 0. 0. 0. 0.]	3 (negative);	tamoxifen/enzalutamide	non-TNBC	0.0523364	0.161456	-0.216182
TCGA-C8-A26V	BRCA	[ 0. 0. -1. 0. 0. 0. 0. 0. 0. 0. 0. 0. 0. 0. 0. 0. 0.]	3 (negative);	tamoxifen/enzalutamide	non-TNBC	-0.353348	-0.0928497	-0.715507
TCGA-C8-A26W	BRCA	[-1. 0. -1. -1. 0. 0. 0. 0. 0. 0. 0. 0. 0. 0. 0. 0. 0.]	1 (negative); 3 (negative); 4 (negative);	erlotinib, tamoxifen/enzalutamide, *	non-TNBC	0.808824	1.51374	-0.0676298
TCGA-C8-A26X	BRCA	[ 0. 0. 0. 0. 0. 0. 0. 0. 0. 0. 0. 0. 0. 0. 0. 0. 0.]			non-TNBC	0.159984	0.311351	-0.301511
TCGA-C8-A26Y	BRCA	[ 0. 0. 0. 0. 0. 0. 0. 0. 0. 0. 0. 0. 0. 0. 0. 0. 0.]			non-TNBC	1.3288	0.239264	0.421262
TCGA-C8-A26Z	BRCA	[ 0. 1. -1. 0. 0. 0. 0. 0. 0. 0. 0. 0. 0. 0. 0. 0. 0.]	2 (positive); 3 (negative);	ramucirumab, tamoxifen/enzalutamide	non-TNBC	0.0930914	0.358734	-0.424024
TCGA-C8-A273	BRCA	[ 0. 1. -1. 0. 0. 0. 0. 0. 0. 0. 0. 0. 0. 0. 0. 0. 0.]	2 (positive); 3 (negative);	ramucirumab, tamoxifen/enzalutamide	non-TNBC	-0.055523	0.218957	-0.457548
TCGA-C8-A274	BRCA	[-1. 0. -1. 0. 0. 0. 0. 0. 0. 0. 0. 0. 0. 0. 0. 0. 0.]	1 (negative); 3 (negative);	erlotinib, tamoxifen/enzalutamide	non-TNBC	0.354038	0.17621	-0.491944
TCGA-C8-A275	BRCA	[ 0. 0. 0. 0. -1. 0. 0. 1. 0. 0. 0. 0. 0. 0. 0. 0. 0.]	5 (negative); 8 (positive);	erlotinib/dasatinib, erlotinib/ramucirumab	non-TNBC	3.02734	0.374166	-0.380652
TCGA-C8-A278	BRCA	[ 0. 0. -1. 0. 0. 0. 0. 0. 0. 0. 0. 0. 0. 0. 0. 0. 0.]	3 (negative);	tamoxifen/enzalutamide	non-TNBC	1.31132	0.294015	-0.452248
TCGA-C8-A27A	BRCA	[ 0. 0. -1. 0. 0. 0. 0. 0. 0. 0. 0. 0. 0. 0. 1. 0. 0.]	3 (negative); 15 (positive);	tamoxifen/enzalutamide, trastuzumab	non-TNBC	-0.450338	-0.362125	-0.918345
TCGA-C8-A27B	BRCA	[ 0. 0. 0. -1. 0. 1. 0. 0. 0. 0. 0. 0. 0. 0. 0. 0. 0.]	4 (negative); 6 (positive);	*, tamoxifen	non-TNBC	0.35595	0.848897	-0.339096
TCGA-C8-A3M7	BRCA	[-1. 0. -1. -1. 0. 0. 0. 0. 0. 0. 0. 0. 0. 0. 0. 0. 0.]	1 (negative); 3 (negative); 4 (negative);	erlotinib, tamoxifen/enzalutamide, *	non-TNBC	0.220319	0.293697	0.0324521
TCGA-C8-A3M8	BRCA	[ 0. 1. -1. 0. 0. 0. 0. 0. 0. 0. 0. 0. 0. 0. 0. 0. 0.]	2 (positive); 3 (negative);	ramucirumab, tamoxifen/enzalutamide	non-TNBC	0.311053	-0.139289	-0.449123
TCGA-D8-A13Y	BRCA	[ 0. 0. 0. 0. 0. 0. 0. -1. 0. 0. 0. 0. 0. 0. 0. 0. 0.]	8 (negative);	tamoxifen	non-TNBC	-0.34961	-0.204339	-0.290845
TCGA-D8-A13Z	BRCA	[ 0. 0. 0. 0. 0. 0. 0. 0. 0. 0. 0. 0. 0. 1. 0. 0. 0.]	14 (positive);	vemurafenib	non-TNBC	-0.0998416	-0.0608109	-0.282396
TCGA-D8-A140	BRCA	[ 0. 1. -1. 0. 0. 0. 0. 0. 0. 0. 0. 0. 0. 0. 0. 0. 0.]	2 (positive); 3 (negative);	ramucirumab, tamoxifen/enzalutamide	non-TNBC	0.375395	-0.0514019	-0.401395
TCGA-D8-A142	BRCA	[ 0. 0. 0. 0. 0. 0. 0. 0. 0. 0. 0. 0. 0. 0. 0. 0. 0.]			non-TNBC	0.217954	-0.120514	-0.288964
TCGA-D8-A143	BRCA	[ 0. 0. 0. 0. -1. 0. 0. 0. 0. 0. 0. 0. 1. 0. 0. 0. 0.]	5 (negative); 13 (positive);	erlotinib/dasatinib, erlotinib	non-TNBC	3.66958	1.03532	3.24112
TCGA-D8-A145	BRCA	[ 0. 0. -1. 0. 0. 0. 0. 0. 1. 0. 0. 0. 0. 0. 0. 0. 0.]	3 (negative); 9 (positive);	tamoxifen/enzalutamide, tamoxifen	non-TNBC	0.330295	-0.046557	-0.380234
TCGA-D8-A146	BRCA	[ 0. 0. -1. 0. 0. 0. 0. 0. 0. 0. 0. 0. 0. 0. 0. 0. 0.]	3 (negative);	tamoxifen/enzalutamide	non-TNBC	-0.105613	-0.142583	-0.428197
TCGA-D8-A147	BRCA	[ 0. 0. 0. 0. 0. 0. 0. 0. 0. 0. 0. 0. 0. 0. 0. 0. 0.]			non-TNBC	0.199671	-0.0876389	-0.133662
TCGA-D8-A1J8	BRCA	[ 0. 0. -1. 0. 0. 0. 0. 0. 0. 0. 0. 0. 0. 0. 0. 0. 0.]	3 (negative);	tamoxifen/enzalutamide	non-TNBC	-0.518655	0.0997023	-0.66796
TCGA-D8-A1J9	BRCA	[-1. 0. -1. 1. -1. 0. 0. 0. 0. 0. 0. 0. 1. 0. 0. 0. 0.]	1 (negative); 3 (negative); 4 (positive); 5 (negative); 13 (positive);	erlotinib, tamoxifen/enzalutamide, lapatinib, erlotinib/dasatinib	non-TNBC	7.85367	-0.215131	-0.84483
TCGA-D8-A1JA	BRCA	[ 0. 0. 0. 0. -1. 0. 0. 1. 0. 0. 0. 0. 1. 0. 0. 0. 0.]	5 (negative); 8 (positive); 13 (positive);	erlotinib/dasatinib, erlotinib/ramucirumab, erlotinib	non-TNBC	5.00802	0.0863571	-0.236736
TCGA-D8-A1JB	BRCA	[ 0. 0. -1. 0. 0. 0. 0. 0. 0. 0. 0. 0. 0. 0. 0. 0. 0.]	3 (negative);	tamoxifen/enzalutamide	non-TNBC	-0.13981	0.728414	-0.501359
TCGA-D8-A1JC	BRCA	[ 0. 0. -1. 0. 0. 0. 0. 0. 0. 0. 0. 0. 0. 0. 0. 0. 0.]	3 (negative);	tamoxifen/enzalutamide	non-TNBC	0.306095	0.15803	-0.60931
TCGA-D8-A1JD	BRCA	[ 0. 1. -1. 0. 0. 0. 0. 0. 0. 0. 0. 0. 0. 0. 0. 0. 0.]	2 (positive); 3 (negative);	ramucirumab, tamoxifen/enzalutamide	non-TNBC	0.072282	0.0400039	-0.634659
TCGA-D8-A1JE	BRCA	[ 0. 1. -1. 0. 0. 0. 0. 0. 0. 0. 0. 0. 0. 0. 0. 0. 0.]	2 (positive); 3 (negative);	ramucirumab, tamoxifen/enzalutamide	non-TNBC	-0.3103	-0.306153	-0.712587
TCGA-D8-A1JF	BRCA	[ 0. 0. -1. 0. 0. 0. 1. 0. 0. 0. 0. 0. 0. 0. 0. 0. 0.]	3 (negative); 7 (positive);	tamoxifen/enzalutamide, dasatinib	non-TNBC	1.05087	-0.173929	0.000642761
TCGA-D8-A1JG	BRCA	[ 0. 0. 0. 0. 0. 0. 0. 0. 0. 0. 0. -1. 0. 0. 0. -1. 0.]	12 (negative); 16 (negative);	trastuzumab	non-TNBC	1.57096	-0.0723668	0.17614
TCGA-D8-A1JH	BRCA	[ 0. 0. -1. 0. 0. 0. 0. 0. 0. 0. 0. 0. 0. 0. 0. 0. 0.]	3 (negative);	tamoxifen/enzalutamide	non-TNBC	0.145783	-0.0357306	-0.510851
TCGA-D8-A1JI	BRCA	[ 0. 0. -1. 0. 0. 0. 0. 0. 1. 0. 0. 0. 0. 0. 0. 0. 0.]	3 (negative); 9 (positive);	tamoxifen/enzalutamide, tamoxifen	non-TNBC	-0.512293	-0.208501	-0.890496
TCGA-D8-A1JJ	BRCA	[ 0. 0. 0. 0. 0. 0. 0. 0. 0. 0. 0. -1. 0. 0. 1. 0. 0.]	12 (negative); 15 (positive);	trastuzumab	non-TNBC	-0.595136	-0.239229	-0.541428
TCGA-D8-A1JK	BRCA	[ 0. 0. 0. 0. 0. 0. 0. 0. 0. 0. 0. -1. 0. 0. 0. 0. 0.]	12 (negative);	trastuzumab	non-TNBC	0.276395	-0.0429328	0.675125
TCGA-D8-A1JL	BRCA	[ 0. 0. 0. 0. 0. 0. 0. 0. 0. 0. 0. 0. 0. 0. 0. 0. 0.]			non-TNBC	0.651209	0.459774	0.0560312
TCGA-D8-A1JM	BRCA	[ 0. 0. 0. 0. 0. 0. 0. 0. 0. 0. 0. 0. 0. 0. 0. 0. 0.]			non-TNBC	0.689731	-0.0641395	0.157157
TCGA-D8-A1JN	BRCA	[ 0. 0. -1. 0. 0. 0. 0. 0. 0. 0. 0. 0. 0. 0. 0. 0. 0.]	3 (negative);	tamoxifen/enzalutamide	non-TNBC	0.0883666	0.0296977	-0.204458
TCGA-D8-A1JP	BRCA	[ 0. 0. -1. 1. 0. 0. 0. 0. 0. 0. 0. 0. 0. 0. 0. 0. 0.]	3 (negative); 4 (positive);	tamoxifen/enzalutamide, lapatinib	TNBC	0.354112	-0.0830725	-0.569752
TCGA-D8-A1JS	BRCA	[ 0. 0. -1. 0. 0. 0. 0. 0. 1. 0. 0. 0. 0. 0. 0. 0. 0.]	3 (negative); 9 (positive);	tamoxifen/enzalutamide, tamoxifen	TNBC	-0.0393075	0.0221386	-0.571046
TCGA-D8-A1JT	BRCA	[ 0. 1. -1. 1. 0. 0. 0. 0. 0. 0. 0. 0. 0. 0. 0. 0. 0.]	2 (positive); 3 (negative); 4 (positive);	ramucirumab, tamoxifen/enzalutamide, lapatinib	non-TNBC	-0.0730946	0.01754	-0.578994
TCGA-D8-A1JU	BRCA	[ 0. 0. -1. 0. 0. 0. 0. 0. 0. 0. 0. 0. 0. 0. 0. 0. 0.]	3 (negative);	tamoxifen/enzalutamide	non-TNBC	0.145283	-0.183631	-0.383433
TCGA-D8-A1X5	BRCA	[ 0. 0. 0. 0. 0. 0. 0. 0. 0. 0. 0. 0. 0. 0. 0. 0. 0.]			non-TNBC	2.10897	0.165234	-0.0611565
TCGA-D8-A1X6	BRCA	[ 0. 1. -1. 0. 0. 0. 0. 0. 0. 0. 0. 0. 0. 0. 0. 0. 0.]	2 (positive); 3 (negative);	ramucirumab, tamoxifen/enzalutamide	non-TNBC	0.807563	-0.00518413	-0.653226
TCGA-D8-A1X7	BRCA	[-1. 1. -1. 0. 0. 0. 0. 0. 0. 0. 0. 0. 0. 0. 0. 0. 0.]	1 (negative); 2 (positive); 3 (negative);	erlotinib, ramucirumab, tamoxifen/enzalutamide	non-TNBC	0.423156	1.2152	-0.403205
TCGA-D8-A1X8	BRCA	[ 0. 0. -1. 0. 0. 0. 0. 0. 0. 0. 0. 0. 0. 0. 0. 0. 0.]	3 (negative);	tamoxifen/enzalutamide	non-TNBC	0.0367598	0.153135	-0.522798
TCGA-D8-A1X9	BRCA	[ 0. 1. -1. 0. 0. 0. 0. 0. 0. 0. 0. 0. 0. 0. 0. 0. 0.]	2 (positive); 3 (negative);	ramucirumab, tamoxifen/enzalutamide	non-TNBC	-0.228641	0.169174	-0.606853
TCGA-D8-A1XA	BRCA	[-1. 1. -1. 0. 0. 0. 0. 0. 0. 0. 0. 0. 0. 0. 0. 0. 0.]	1 (negative); 2 (positive); 3 (negative);	erlotinib, ramucirumab, tamoxifen/enzalutamide	TNBC	0.521651	0.185717	-0.622993
TCGA-D8-A1XB	BRCA	[ 0. 0. -1. 0. 0. 0. 0. 0. 0. 0. 0. 0. 0. 0. 0. 0. 0.]	3 (negative);	tamoxifen/enzalutamide	non-TNBC	0.114353	-0.0322954	-0.53327
TCGA-D8-A1XC	BRCA	[ 0. 0. -1. 0. 0. 0. 0. 0. 0. 0. 0. 0. 0. 0. 0. 0. 0.]	3 (negative);	tamoxifen/enzalutamide	non-TNBC	0.292421	1.28582	-0.544149
TCGA-D8-A1XD	BRCA	[ 0. 1. -1. 0. 0. 0. 0. 0. 0. 0. 0. 0. 0. 0. 0. 0. 0.]	2 (positive); 3 (negative);	ramucirumab, tamoxifen/enzalutamide	TNBC	0.0341724	-0.14078	-0.604403
TCGA-D8-A1XF	BRCA	[ 0. 1. -1. 0. 0. 0. 0. 0. 0. 0. 0. 0. 0. 0. 0. 0. 0.]	2 (positive); 3 (negative);	ramucirumab, tamoxifen/enzalutamide	non-TNBC	0.180861	0.118798	-0.592998
TCGA-D8-A1XG	BRCA	[ 0. 1. -1. 0. 0. 0. 0. 0. 0. 0. 0. 0. 0. 0. 0. 0. 0.]	2 (positive); 3 (negative);	ramucirumab, tamoxifen/enzalutamide	non-TNBC	-0.26414	0.26815	-0.59545
TCGA-D8-A1XJ	BRCA	[ 0. 0. -1. 0. -1. 0. 0. 0. 0. 0. 0. 0. 1. 0. 0. 0. 0.]	3 (negative); 5 (negative); 13 (positive);	tamoxifen/enzalutamide, erlotinib/dasatinib, erlotinib	non-TNBC	4.99114	0.411754	-0.408613
TCGA-D8-A1XK	BRCA	[-1. 0. 0. -1. 0. 0. -1. 0. 0. 0. 0. 0. 0. 0. 0. 0. 0.]	1 (negative); 4 (negative); 7 (negative);	erlotinib, *, erlotinib/tamoxifen/enzalutamide	non-TNBC	0.785332	1.48199	0.16115
TCGA-D8-A1XL	BRCA	[ 0. 1. -1. 0. 0. 0. 0. 0. 0. 0. 0. 0. 0. 0. 0. 0. 0.]	2 (positive); 3 (negative);	ramucirumab, tamoxifen/enzalutamide	non-TNBC	-0.00949918	-0.070828	-0.657681
TCGA-D8-A1XM	BRCA	[ 0. 0. -1. 0. 0. 0. 0. 0. 0. 0. 0. 0. 0. 0. 0. 0. 0.]	3 (negative);	tamoxifen/enzalutamide	non-TNBC	0.117861	-0.225903	-0.38644
TCGA-D8-A1XO	BRCA	[ 0. 0. -1. 0. 0. 0. 0. 0. 0. 0. 0. 0. 0. 0. 0. 0. 0.]	3 (negative);	tamoxifen/enzalutamide	non-TNBC	0.163072	0.218318	-0.675271
TCGA-D8-A1XQ	BRCA	[ 0. 0. 0. 0. 0. 0. 0. 0. 0. 0. 0. 0. 0. 0. 0. 0. 0.]			non-TNBC	-0.252862	-0.0622163	-0.221278
TCGA-D8-A1XR	BRCA	[-1. 0. -1. 0. 0. 0. 0. 0. 0. 0. 0. 0. 0. 0. 0. 0. 0.]	1 (negative); 3 (negative);	erlotinib, tamoxifen/enzalutamide	TNBC	0.556136	0.999834	-0.202182
TCGA-D8-A1XS	BRCA	[ 0. 1. -1. 0. 0. 0. 0. 1. 0. 0. 0. 0. 0. 0. 0. 0. 0.]	2 (positive); 3 (negative); 8 (positive);	ramucirumab, tamoxifen/enzalutamide, erlotinib/ramucirumab	non-TNBC	0.279727	0.148768	-0.685784
TCGA-D8-A1XT	BRCA	[-1. 0. -1. 0. 0. 0. 0. 0. 0. 0. 0. 0. 0. 0. 0. 0. 0.]	1 (negative); 3 (negative);	erlotinib, tamoxifen/enzalutamide	non-TNBC	3.30363	0.120537	-0.500062
TCGA-D8-A1XU	BRCA	[ 0. 0. -1. 0. 0. 0. 0. 0. 1. 0. 0. 0. 0. 0. 0. 0. 0.]	3 (negative); 9 (positive);	tamoxifen/enzalutamide, tamoxifen	non-TNBC	0.133717	0.311005	-0.528668
TCGA-D8-A1XV	BRCA	[ 0. 0. -1. 0. 0. 0. 0. 0. 0. 0. 0. 0. 0. 0. 0. 0. 0.]	3 (negative);	tamoxifen/enzalutamide	non-TNBC	0.0265636	2.6031	-0.634465
TCGA-D8-A1XW	BRCA	[-1. 0. 0. 0. 0. 0. 0. 0. 0. 0. -1. 0. 0. 0. 0. 0. 0.]	1 (negative); 11 (negative);	erlotinib, *	non-TNBC	0.630237	0.29985	-0.093199
TCGA-D8-A1XY	BRCA	[ 0. 0. -1. 0. 0. 0. 0. 0. 0. 0. 0. 0. 0. 0. 0. 0. 0.]	3 (negative);	tamoxifen/enzalutamide	non-TNBC	0.698466	0.453805	-0.426824
TCGA-D8-A1XZ	BRCA	[ 0. 1. -1. 0. 0. 0. 0. 0. 0. 0. 0. 0. 0. 0. 0. 0. 0.]	2 (positive); 3 (negative);	ramucirumab, tamoxifen/enzalutamide	non-TNBC	-0.304528	-0.147767	-0.563401
TCGA-D8-A1Y0	BRCA	[ 0. 0. -1. 0. 0. 0. 0. 0. 0. 0. 0. 0. 0. 0. 0. 0. 0.]	3 (negative);	tamoxifen/enzalutamide	non-TNBC	0.650474	0.120028	-0.420738
TCGA-D8-A1Y1	BRCA	[ 0. 0. -1. 0. 0. 0. 0. 0. 0. 0. 0. 0. 0. 0. 0. 0. 0.]	3 (negative);	tamoxifen/enzalutamide	TNBC	-0.112135	-0.0859515	-0.418445
TCGA-D8-A1Y2	BRCA	[-1. 1. -1. 0. 0. 0. 0. 0. 0. 0. 0. 0. 0. 0. 0. 0. 0.]	1 (negative); 2 (positive); 3 (negative);	erlotinib, ramucirumab, tamoxifen/enzalutamide	TNBC	0.358776	0.185625	-0.494388
TCGA-D8-A1Y3	BRCA	[ 0. 1. -1. 0. 0. 0. 0. 0. 0. 0. 0. 0. 0. 0. 0. 0. 0.]	2 (positive); 3 (negative);	ramucirumab, tamoxifen/enzalutamide	non-TNBC	0.142839	0.534521	-0.667105
TCGA-D8-A27E	BRCA	[ 0. 0. -1. 0. 0. 0. 0. 0. 0. 0. 0. 0. 0. 0. 0. 0. 0.]	3 (negative);	tamoxifen/enzalutamide	non-TNBC	0.721426	0.667092	-0.383743
TCGA-D8-A27F	BRCA	[ 0. 0. 0. 0. 0. 0. 0. 0. 0. 0. 0. 0. 0. 0. 0. 0. 0.]			non-TNBC	0.280814	0.4557	-0.155107
TCGA-D8-A27G	BRCA	[-1. 0. -1. 0. 0. 0. 0. 0. 0. 0. 0. 0. 0. 0. 0. 0. 0.]	1 (negative); 3 (negative);	erlotinib, tamoxifen/enzalutamide	non-TNBC	0.341997	0.507446	-0.350564
TCGA-D8-A27H	BRCA	[-1. 0. 0. 0. 0. 0. 0. 0. 0. 0. 0. 0. 0. 0. 0. 0. 0.]	1 (negative);	erlotinib	non-TNBC	0.537702	0.5045	-0.144918
TCGA-D8-A27I	BRCA	[-1. 0. -1. 0. 0. 0. 0. 0. 0. 0. 0. 0. 0. 0. 0. 0. 0.]	1 (negative); 3 (negative);	erlotinib, tamoxifen/enzalutamide	non-TNBC	0.186915	0.547598	0.0130716
TCGA-D8-A27K	BRCA	[ 0. 0. -1. 0. 0. 0. 0. 0. 0. 0. 0. 0. 0. 0. 0. 0. 0.]	3 (negative);	tamoxifen/enzalutamide	non-TNBC	0.335444	0.0268947	-0.325646
TCGA-D8-A27L	BRCA	[ 0. 0. -1. 0. 0. 0. 0. 0. 0. 0. 0. 0. 0. 0. 0. 0. 0.]	3 (negative);	tamoxifen/enzalutamide	non-TNBC	0.117801	-0.182731	-0.448671
TCGA-D8-A27M	BRCA	[ 0. 0. 0. 0. 0. 0. 0. 0. 0. 0. 0. 0. 0. 0. 0. 0. 0.]			non-TNBC	0.31183	0.0532561	0.189373
TCGA-D8-A27N	BRCA	[ 0. 0. -1. 0. 0. 0. 0. 0. 0. 0. 0. 0. 0. 0. 0. 0. 0.]	3 (negative);	tamoxifen/enzalutamide	non-TNBC	0.719782	-0.0566412	-0.217669
TCGA-D8-A27P	BRCA	[ 0. 1. -1. 1. 0. 0. 0. 0. 0. 0. 0. 0. 0. 0. 0. 0. 0.]	2 (positive); 3 (negative); 4 (positive);	ramucirumab, tamoxifen/enzalutamide, lapatinib	non-TNBC	0.505729	-0.182609	-0.247096
TCGA-D8-A27R	BRCA	[ 0. 0. -1. 0. 0. 0. 0. 0. 0. 0. 0. 0. 0. 0. 0. 0. 0.]	3 (negative);	tamoxifen/enzalutamide	non-TNBC	0.144095	0.0627501	-0.189208
TCGA-D8-A27T	BRCA	[ 0. 0. -1. 0. 0. 0. 0. 0. 0. 0. 0. 0. 0. 0. 0. 0. 0.]	3 (negative);	tamoxifen/enzalutamide	non-TNBC	-0.162021	-0.251252	-0.38576
TCGA-D8-A27V	BRCA	[ 0. 0. -1. 0. 0. 0. 0. 0. 0. 0. 0. 0. 0. 0. 0. 0. 0.]	3 (negative);	tamoxifen/enzalutamide	non-TNBC	0.41238	0.0123569	-0.313333
TCGA-D8-A27W	BRCA	[ 0. 1. -1. 0. 0. 0. 0. 0. 0. 0. 0. 0. 0. 0. 0. 0. 0.]	2 (positive); 3 (negative);	ramucirumab, tamoxifen/enzalutamide	non-TNBC	-0.20411	-0.0543353	-0.327288
TCGA-E2-A107	BRCA	[ 0. 0. -1. 0. 0. 0. 0. 0. 0. 0. 0. 0. 0. 0. 0. 0. 0.]	3 (negative);	tamoxifen/enzalutamide	non-TNBC	0.120143	0.205978	-0.405538
TCGA-E2-A108	BRCA	[-1. 0. -1. -1. 1. 0. 1. 0. 0. 0. 0. 0. 0. 0. 0. 0. 0.]	1 (negative); 3 (negative); 4 (negative); 5 (positive); 7 (positive);	erlotinib, tamoxifen/enzalutamide, *, tamoxifen, dasatinib	non-TNBC	0.338075	0.629847	0.253569
TCGA-E2-A109	BRCA	[ 0. 0. -1. 0. 0. 0. 0. 0. 0. 0. 0. 0. 0. 0. 0. 0. 0.]	3 (negative);	tamoxifen/enzalutamide	non-TNBC	-0.0746944	-0.0571111	-0.561999
TCGA-E2-A10A	BRCA	[ 0. 1. -1. 0. 0. 0. 0. 0. 0. 0. 0. 0. 0. 0. 0. 0. 0.]	2 (positive); 3 (negative);	ramucirumab, tamoxifen/enzalutamide	non-TNBC	-0.120617	-0.0367741	-0.44644
TCGA-E2-A10B	BRCA	[ 0. 0. -1. 0. 0. 0. 0. 0. 0. 0. 0. 0. 0. 0. 0. 0. 0.]	3 (negative);	tamoxifen/enzalutamide	non-TNBC	-0.0229424	-0.117041	-0.621351
TCGA-E2-A10C	BRCA	[ 0. 0. -1. 0. 0. 0. 0. 0. 0. 0. 0. 0. 0. 0. 0. 0. 0.]	3 (negative);	tamoxifen/enzalutamide	non-TNBC	-0.136988	0.426352	-0.0665371
TCGA-E2-A10E	BRCA	[ 0. 0. -1. 0. 0. 0. 0. 0. 0. 0. 0. 0. 0. 0. 0. 0. 0.]	3 (negative);	tamoxifen/enzalutamide	non-TNBC	-0.0196225	-0.0921941	-0.493764
TCGA-E2-A14N	BRCA	[ 0. 0. 0. 0. 0. 0. 0. 0. 0. 0. 0. 0. 0. 0. 0. 0. 0.]			non-TNBC	-0.0386593	0.253573	-0.196486
TCGA-E2-A14O	BRCA	[ 0. 0. -1. 0. 0. 0. 0. 0. 0. 0. 0. 0. 0. 0. 0. 0. 0.]	3 (negative);	tamoxifen/enzalutamide	non-TNBC	-0.45762	0.0317769	-0.176833
TCGA-E2-A14P	BRCA	[ 0. 0. 0. 0. 0. 0. 0. 0. 0. 0. 0. 0. 0. 0. 0. 0. 0.]			non-TNBC	0.324632	-0.0238769	-0.231658
TCGA-E2-A14Q	BRCA	[ 0. 0. -1. 1. 0. 0. 0. 0. 0. 0. 0. 0. 0. 0. 0. 0. 0.]	3 (negative); 4 (positive);	tamoxifen/enzalutamide, lapatinib	non-TNBC	-0.465544	-0.0636081	-0.454644
TCGA-E2-A14S	BRCA	[ 0. 1. -1. 0. 0. 0. 0. 0. 0. 0. 0. 0. 0. 0. 0. 0. 0.]	2 (positive); 3 (negative);	ramucirumab, tamoxifen/enzalutamide	TNBC	0.098571	-0.015432	-0.282645
TCGA-E2-A14T	BRCA	[ 0. 0. -1. 0. 0. 0. 0. 0. 0. 0. 0. 0. 0. 0. 0. 0. 0.]	3 (negative);	tamoxifen/enzalutamide	TNBC	-0.113433	0.0137224	-0.153313
TCGA-E2-A14V	BRCA	[ 0. 0. -1. 0. 0. 0. 0. 0. 0. 0. 0. 0. 0. 0. 0. 0. 0.]	3 (negative);	tamoxifen/enzalutamide	non-TNBC	0.78848	0.0391298	-0.25073
TCGA-E2-A14W	BRCA	[ 0. 1. -1. 0. 0. 0. 0. 0. 0. 0. 0. 0. 0. 0. 0. 0. 0.]	2 (positive); 3 (negative);	ramucirumab, tamoxifen/enzalutamide	non-TNBC	-0.354082	-0.117014	-0.614104
TCGA-E2-A14X	BRCA	[ 0. 0. 0. 0. 0. 0. 0. 0. 0. 0. 0. 0. 0. 0. 0. 0. 0.]			non-TNBC	0.134715	0.1223	0.153771
TCGA-E2-A14Y	BRCA	[ 0. 0. 0. 0. -1. 1. 0. 0. 0. 0. 0. 0. 0. 0. 0. 0. 0.]	5 (negative); 6 (positive);	erlotinib/dasatinib, tamoxifen	non-TNBC	0.536753	0.125573	0.596718
TCGA-E2-A14Z	BRCA	[ 0. 0. -1. 0. 0. 1. 0. 0. 0. 0. 0. 0. 0. 0. 0. 0. 0.]	3 (negative); 6 (positive);	tamoxifen/enzalutamide, tamoxifen	TNBC	0.0927867	0.00461543	-0.351513
TCGA-E2-A150	BRCA	[-1. 0. 0. 0. -1. 0. 0. 0. 0. 0. 0. 0. 0. 0. 0. 0. 0.]	1 (negative); 5 (negative);	erlotinib, erlotinib/dasatinib	non-TNBC	3.29135	0.850641	3.24107
TCGA-E2-A152	BRCA	[ 0. 0. -1. 1. 0. 0. 0. 0. 0. 0. 0. 0. 0. 0. 0. 0. 0.]	3 (negative); 4 (positive);	tamoxifen/enzalutamide, lapatinib	non-TNBC	1.99068	-0.157954	-0.494251
TCGA-E2-A153	BRCA	[ 0. 0. -1. 1. 0. 0. 0. 1. 0. 0. 0. 0. 0. 0. 0. 0. 0.]	3 (negative); 4 (positive); 8 (positive);	tamoxifen/enzalutamide, lapatinib, erlotinib/ramucirumab	non-TNBC	-0.129925	-0.203143	-0.575755
TCGA-E2-A154	BRCA	[ 0. 0. -1. 1. 0. 0. 0. 0. 0. 0. 0. 0. 0. 0. 0. 0. 0.]	3 (negative); 4 (positive);	tamoxifen/enzalutamide, lapatinib	non-TNBC	0.154395	-0.128065	-0.577778
TCGA-E2-A155	BRCA	[ 0. 1. -1. 1. 0. 0. 0. 0. 0. 0. 0. 0. 0. 0. 0. 0. 0.]	2 (positive); 3 (negative); 4 (positive);	ramucirumab, tamoxifen/enzalutamide, lapatinib	non-TNBC	0.190485	-0.0467737	-0.577874
TCGA-E2-A156	BRCA	[ 0. 0. -1. 1. 0. 0. 0. 0. 0. 0. 0. 0. 0. 0. 0. 0. 0.]	3 (negative); 4 (positive);	tamoxifen/enzalutamide, lapatinib	non-TNBC	0.0805826	-0.193181	-0.751909
TCGA-E2-A158	BRCA	[ 0. 0. 0. 0. 0. 0. 0. 0. 0. 0. 0. 0. 0. 0. 0. 0. 0.]			non-TNBC	0.0798742	-0.193011	-0.18671
TCGA-E2-A159	BRCA	[ 0. 0. 0. 0. 0. 0. 0. 0. 0. 0. 0. 0. 0. 0. 0. 0. 0.]			non-TNBC	-0.1744	-0.172547	0.218293
TCGA-E2-A15A	BRCA	[ 0. 0. 0. 0. 0. 0. 0. 0. 0. 0. 0. 0. 0. 0. 0. 0. 0.]			non-TNBC	0.0521462	-0.22195	-0.556545
TCGA-E2-A15C	BRCA	[-1. 1. -1. 0. 0. 0. 0. 0. 0. 0. 0. 0. 0. 0. 0. 0. 0.]	1 (negative); 2 (positive); 3 (negative);	erlotinib, ramucirumab, tamoxifen/enzalutamide	non-TNBC	0.0789	0.0864135	-0.0283445
TCGA-E2-A15D	BRCA	[ 0. 0. -1. 0. 0. 0. 0. 0. 0. 0. 0. 0. 0. 0. 0. 0. 0.]	3 (negative);	tamoxifen/enzalutamide	non-TNBC	0.123178	0.085025	-0.40877
TCGA-E2-A15E	BRCA	[ 0. 0. -1. 0. 0. 0. 0. 1. 0. 0. 0. 0. 0. 0. 0. 0. 0.]	3 (negative); 8 (positive);	tamoxifen/enzalutamide, erlotinib/ramucirumab	non-TNBC	0.357073	-0.00842547	-0.300399
TCGA-E2-A15F	BRCA	[ 0. 1. -1. 0. 0. 0. 0. 0. 0. 0. 0. 0. 0. 0. 0. 0. 0.]	2 (positive); 3 (negative);	ramucirumab, tamoxifen/enzalutamide	non-TNBC	-0.269572	-0.0343623	-0.572436
TCGA-E2-A15G	BRCA	[ 0. 0. -1. 0. 0. 0. 0. 0. 0. 0. 0. 0. 0. 0. 0. 0. 0.]	3 (negative);	tamoxifen/enzalutamide	non-TNBC	0.481078	-0.0280131	-0.527761
TCGA-E2-A15H	BRCA	[ 0. 1. -1. 0. 0. 0. 0. 0. 0. 0. 0. 0. 0. 0. 0. 0. 0.]	2 (positive); 3 (negative);	ramucirumab, tamoxifen/enzalutamide	non-TNBC	0.96253	-0.309528	-0.419999
TCGA-E2-A15I	BRCA	[-1. 0. -1. 0. 0. 0. 0. 0. 0. 0. 0. 0. 0. 0. 0. 0. 0.]	1 (negative); 3 (negative);	erlotinib, tamoxifen/enzalutamide	non-TNBC	0.731553	1.32882	-0.53814
TCGA-E2-A15J	BRCA	[ 0. 1. -1. 0. 0. 0. 0. 0. 0. 0. 0. 0. 0. 0. 0. 0. 0.]	2 (positive); 3 (negative);	ramucirumab, tamoxifen/enzalutamide	non-TNBC	-0.0368696	-0.0153487	-0.469455
TCGA-E2-A15K	BRCA	[ 0. 0. -1. 0. 0. 0. 0. 0. 0. 0. 0. 0. 0. 0. 0. 0. 0.]	3 (negative);	tamoxifen/enzalutamide	non-TNBC	-0.323865	-0.201829	-0.38124
TCGA-E2-A15L	BRCA	[ 0. 0. -1. 0. 0. 0. 0. 0. 0. 0. 0. 0. 0. 0. 0. 0. 0.]	3 (negative);	tamoxifen/enzalutamide	non-TNBC	0.128373	-0.0501324	-0.460365
TCGA-E2-A15M	BRCA	[ 0. 0. -1. 0. 0. 0. 0. 0. 0. 0. 0. 0. 0. 0. 0. 0. 0.]	3 (negative);	tamoxifen/enzalutamide	non-TNBC	-0.276598	-0.106786	-0.210932
TCGA-E2-A15O	BRCA	[ 0. 0. -1. 0. 0. 0. 0. 0. 0. 0. 0. 0. 0. 0. 0. 0. 0.]	3 (negative);	tamoxifen/enzalutamide	non-TNBC	-0.398856	-0.262155	-0.800772
TCGA-E2-A15P	BRCA	[ 0. 0. -1. 0. 0. 0. 0. 0. 0. 0. 0. 0. 0. 0. 0. 0. 0.]	3 (negative);	tamoxifen/enzalutamide	non-TNBC	0.131154	-0.136208	-0.443698
TCGA-E2-A15R	BRCA	[ 0. 0. -1. 0. 0. 0. 0. 0. 0. 0. 0. 0. 0. 0. 0. 0. 0.]	3 (negative);	tamoxifen/enzalutamide	TNBC	0.0811054	-0.164006	-0.533958
TCGA-E2-A15S	BRCA	[ 0. 0. -1. 0. 0. 0. 0. 0. 0. 0. 0. 0. 0. 0. 0. 0. 0.]	3 (negative);	tamoxifen/enzalutamide	non-TNBC	0.300778	-0.063429	-0.539791
TCGA-E2-A15T	BRCA	[ 0. 1. -1. 0. 0. 0. 0. 0. 0. 0. 0. 0. 0. 0. 0. 0. 0.]	2 (positive); 3 (negative);	ramucirumab, tamoxifen/enzalutamide	non-TNBC	0.31452	-0.156832	-0.641107
TCGA-E2-A1AZ	BRCA	[ 0. 0. 0. 0. 0. 0. 0. 0. 0. 0. 0. 0. 0. 0. 0. 0. 0.]			non-TNBC	0.010571	-0.13756	-0.373454
TCGA-E2-A1B0	BRCA	[-1. 0. 0. 0. 0. 0. 0. 0. 0. 0. 0. 0. 0. 0. 0. 0. 0.]	1 (negative);	erlotinib	non-TNBC	0.157017	0.0418981	0.0244727
TCGA-E2-A1B1	BRCA	[-1. 0. -1. 0. 0. 0. 0. 0. 0. 0. 0. 0. 0. 0. 0. 0. 0.]	1 (negative); 3 (negative);	erlotinib, tamoxifen/enzalutamide	non-TNBC	0.775463	0.0293484	-0.0138304
TCGA-E2-A1B4	BRCA	[ 0. 1. -1. 0. 0. 0. 0. 0. 0. 0. 0. 0. 0. 0. 0. 0. 0.]	2 (positive); 3 (negative);	ramucirumab, tamoxifen/enzalutamide	non-TNBC	-0.144918	0.107378	-0.378999
TCGA-E2-A1B5	BRCA	[-1. 0. -1. -1. 0. 0. 0. 0. 0. 0. 0. 0. 0. 0. 0. 0. 0.]	1 (negative); 3 (negative); 4 (negative);	erlotinib, tamoxifen/enzalutamide, *	non-TNBC	0.431665	0.546082	0.200223
TCGA-E2-A1B6	BRCA	[ 0. 0. 0. -1. 0. 0. 0. 0. 0. 0. 0. 0. 0. 0. 0. 0. 0.]	4 (negative);	*	non-TNBC	0.0116439	0.243318	-0.246253
TCGA-E2-A1BC	BRCA	[ 0. 0. -1. 0. 0. 0. 0. 0. 0. 0. 0. 0. 0. 0. 0. 0. 0.]	3 (negative);	tamoxifen/enzalutamide	non-TNBC	0.818653	-0.0579501	-0.122867
TCGA-E2-A1BD	BRCA	[ 0. 0. -1. 1. 0. 0. 0. 0. 0. 0. 0. 0. 0. 0. 0. 0. 0.]	3 (negative); 4 (positive);	tamoxifen/enzalutamide, lapatinib	non-TNBC	-0.340236	-0.2594	-0.55845
TCGA-E2-A1IG	BRCA	[ 0. 1. -1. 0. 0. 0. 0. 0. 0. 0. 0. 0. 0. 0. 0. 0. 0.]	2 (positive); 3 (negative);	ramucirumab, tamoxifen/enzalutamide	non-TNBC	0.346899	0.171614	-0.524575
TCGA-E2-A1IL	BRCA	[-1. 0. -1. 0. 0. 0. 0. 0. 0. 0. 0. 0. 0. 0. 0. 0. 0.]	1 (negative); 3 (negative);	erlotinib, tamoxifen/enzalutamide	non-TNBC	1.05798	0.535847	-0.417753
TCGA-E2-A1IU	BRCA	[-1. 0. -1. 0. 0. 0. 0. 0. 0. 0. 0. 0. 0. 0. 0. 0. 0.]	1 (negative); 3 (negative);	erlotinib, tamoxifen/enzalutamide	TNBC	0.481891	0.621107	-0.262992
TCGA-E2-A1L6	BRCA	[ 0. 1. -1. 0. 0. 0. 0. 0. 0. 0. 0. 0. 0. 0. 0. 0. 0.]	2 (positive); 3 (negative);	ramucirumab, tamoxifen/enzalutamide	non-TNBC	-0.0701886	2.34257	-0.610285
TCGA-E2-A1L7	BRCA	[ 0. 1. -1. 0. 0. 0. -1. 0. 0. 0. 0. 0. 0. 0. 0. 0. 0.]	2 (positive); 3 (negative); 7 (negative);	ramucirumab, tamoxifen/enzalutamide, erlotinib/tamoxifen/enzalutamide	TNBC	-0.344488	0.307227	-0.555477
TCGA-E2-A1L8	BRCA	[ 0. 0. -1. 0. 0. 0. 0. 0. 0. 0. 0. 0. 0. 0. 0. 0. 0.]	3 (negative);	tamoxifen/enzalutamide	non-TNBC	-0.205465	0.451863	-0.390873
TCGA-E2-A1LB	BRCA	[ 0. 0. -1. 0. 0. 0. 0. 0. 0. 0. 0. 0. 0. 0. 0. 0. 0.]	3 (negative);	tamoxifen/enzalutamide	non-TNBC	2.17327	0.802154	-0.264914
TCGA-E2-A1LE	BRCA	[ 0. 0. 0. 0. 0. 0. 0. 0. 0. 0. 0. 0. 0. 0. 0. 0. 0.]			non-TNBC	1.01682	0.0224227	-0.247551
TCGA-E2-A1LG	BRCA	[-1. 0. -1. -1. 0. 0. -1. 0. 0. 0. 0. 0. 0. 0. 0. 0. 0.]	1 (negative); 3 (negative); 4 (negative); 7 (negative);	erlotinib, tamoxifen/enzalutamide, *, erlotinib/tamoxifen/enzalutamide	non-TNBC	0.865415	1.97423	0.403175
TCGA-E2-A1LK	BRCA	[ 0. 0. 0. 0. 0. 0. 0. 0. 0. 0. 0. 0. 0. 0. 0. 0. 0.]			non-TNBC	0.96629	0.483755	-0.296681
TCGA-E2-A1LL	BRCA	[-1. 0. 0. 0. 0. 0. 0. 0. 0. 0. 0. 0. 0. 0. 0. 0. 0.]	1 (negative);	erlotinib	non-TNBC	0.0790695	0.799701	0.0956031
TCGA-E2-A1LS	BRCA	[ 0. 1. 0. 0. 0. 0. 0. 0. 0. 0. -1. 0. 0. 0. 0. 0. 0.]	2 (positive); 11 (negative);	ramucirumab, *	non-TNBC	0.396132	0.626758	-0.196702
TCGA-E2-A2P5	BRCA	[ 0. 0. -1. 0. 0. 0. 0. 0. 0. 0. 0. 0. 0. 0. 0. 0. 0.]	3 (negative);	tamoxifen/enzalutamide	non-TNBC	-0.0626207	-0.0447156	-0.233153
TCGA-E2-A3DX	BRCA	[-1. 0. -1. 0. 0. 0. 0. 0. 0. 0. 0. 0. 0. 0. 0. 0. 0.]	1 (negative); 3 (negative);	erlotinib, tamoxifen/enzalutamide	non-TNBC	1.99548	0.00747744	0.0676872
TCGA-E9-A1N3	BRCA	[ 0. 0. -1. 0. 0. 0. 0. 0. 0. 0. 0. 0. 0. 0. 0. 0. 0.]	3 (negative);	tamoxifen/enzalutamide	non-TNBC	0.173886	0.00255864	-0.728399
TCGA-E9-A1N4	BRCA	[ 0. 1. -1. 0. 0. 0. 0. 0. 0. 0. 0. 0. 0. 0. 0. 0. 0.]	2 (positive); 3 (negative);	ramucirumab, tamoxifen/enzalutamide	TNBC	-0.0783742	0.11647	-0.19955
TCGA-E9-A1N5	BRCA	[ 0. 1. -1. 0. 0. 0. 0. 0. 0. 0. 0. 0. 0. 0. 0. 0. 0.]	2 (positive); 3 (negative);	ramucirumab, tamoxifen/enzalutamide	non-TNBC	-0.679462	-0.304415	-0.729684
TCGA-E9-A1N6	BRCA	[ 0. 0. -1. 0. 0. 0. 0. 0. 0. 0. 0. 0. 0. 0. 0. 0. 0.]	3 (negative);	tamoxifen/enzalutamide	non-TNBC	-0.187674	0.214731	-0.586916
TCGA-E9-A1N8	BRCA	[ 0. 0. 0. 0. 0. 0. 0. 0. -1. 0. 0. 0. 0. 0. 0. 0. 0.]	9 (negative);	*	non-TNBC	-0.0424258	0.174824	-0.355066
TCGA-E9-A1N9	BRCA	[ 0. 1. -1. 0. 0. 0. 0. 0. 0. 0. 0. 0. 0. 0. 0. 0. 0.]	2 (positive); 3 (negative);	ramucirumab, tamoxifen/enzalutamide	non-TNBC	-0.451177	0.195932	-0.561241
TCGA-E9-A1NA	BRCA	[ 0. 0. -1. 0. 0. 0. 0. 0. 0. 0. 0. 0. 0. 0. 0. 0. 0.]	3 (negative);	tamoxifen/enzalutamide	non-TNBC	0.799139	-0.164806	-0.623724
TCGA-E9-A1ND	BRCA	[ 0. 0. 0. 0. 0. 0. 0. 0. 0. 0. 0. 0. 0. 0. 0. -1. 0.]	16 (negative);	trastuzumab	non-TNBC	0.00318241	-0.0970188	-0.0930892
TCGA-E9-A1NE	BRCA	[ 0. 0. -1. 0. 0. 0. 0. 0. 0. 0. 0. 0. 0. 0. 0. 0. 0.]	3 (negative);	tamoxifen/enzalutamide	non-TNBC	-0.00281783	-0.0184707	-0.226701
TCGA-E9-A1NF	BRCA	[ 0. 0. -1. 0. 0. 0. 0. 0. 0. 0. 0. 0. 0. 0. 0. 0. 0.]	3 (negative);	tamoxifen/enzalutamide	non-TNBC	-0.0941563	0.546657	-0.573859
TCGA-E9-A1NG	BRCA	[ 0. 1. -1. 0. 0. 0. 0. 0. 0. 0. 0. 0. 0. 0. 0. 0. 0.]	2 (positive); 3 (negative);	ramucirumab, tamoxifen/enzalutamide	non-TNBC	0.000410184	0.44426	-0.434767
TCGA-E9-A1NH	BRCA	[ 0. 1. -1. 0. 0. 0. 0. 0. 0. 0. 0. 0. 0. 0. 0. 0. 0.]	2 (positive); 3 (negative);	ramucirumab, tamoxifen/enzalutamide	non-TNBC	0.0637467	0.164298	-0.508464
TCGA-E9-A1NI	BRCA	[ 0. 1. -1. 0. 0. 0. 0. 0. 0. 0. 0. 0. 0. 0. 0. 0. 0.]	2 (positive); 3 (negative);	ramucirumab, tamoxifen/enzalutamide	non-TNBC	-0.162313	0.41526	-0.644195
TCGA-E9-A1QZ	BRCA	[-1. 1. -1. 0. 0. 0. 0. 0. 0. 0. 0. 0. 0. 0. 0. 0. 0.]	1 (negative); 2 (positive); 3 (negative);	erlotinib, ramucirumab, tamoxifen/enzalutamide	non-TNBC	0.106852	0.836092	-0.485901
TCGA-E9-A1R0	BRCA	[-1. 0. -1. 0. 0. -1. 0. 0. 0. 0. 0. 0. 0. 0. 0. 0. 0.]	1 (negative); 3 (negative); 6 (negative);	erlotinib, tamoxifen/enzalutamide, *	non-TNBC	1.59606	1.72946	0.359668
TCGA-E9-A1R2	BRCA	[ 0. 1. -1. 0. 0. 0. 0. 0. 0. 0. 0. 0. 0. 0. 0. 0. 0.]	2 (positive); 3 (negative);	ramucirumab, tamoxifen/enzalutamide	non-TNBC	-0.0263317	-0.149188	-0.804645
TCGA-E9-A1R3	BRCA	[ 0. 0. -1. 0. 0. 0. 0. 0. 0. 0. 0. 0. 0. 0. 0. 0. 0.]	3 (negative);	tamoxifen/enzalutamide	non-TNBC	-0.225793	-0.00224996	-0.450544
TCGA-E9-A1R4	BRCA	[ 0. 0. -1. 0. 0. 0. 0. 0. 0. 0. 0. 0. 0. 0. 0. 0. 0.]	3 (negative);	tamoxifen/enzalutamide	non-TNBC	-0.0325624	-0.0233826	-0.512787
TCGA-E9-A1R5	BRCA	[ 0. 0. -1. 1. 0. 0. 0. 0. 0. 0. 0. 0. 0. 0. 0. 0. 0.]	3 (negative); 4 (positive);	tamoxifen/enzalutamide, lapatinib	TNBC	1.92883	-0.10375	-0.60488
TCGA-E9-A1R6	BRCA	[-1. 0. -1. -1. 0. 0. 0. -1. 0. 0. 0. 0. 0. 0. 0. 0. 0.]	1 (negative); 3 (negative); 4 (negative); 8 (negative);	erlotinib, tamoxifen/enzalutamide, *, tamoxifen	non-TNBC	0.681758	2.62505	0.149766
TCGA-E9-A1R7	BRCA	[ 0. 0. -1. 0. 0. 0. 0. 0. 0. 0. 0. 0. 0. 0. 0. 0. 0.]	3 (negative);	tamoxifen/enzalutamide	non-TNBC	1.28085	0.363281	-0.583259
TCGA-E9-A1RA	BRCA	[-1. 1. -1. 0. 0. 0. 0. 0. 0. 0. 0. 0. 0. 0. 0. 0. 0.]	1 (negative); 2 (positive); 3 (negative);	erlotinib, ramucirumab, tamoxifen/enzalutamide	non-TNBC	1.3774	0.596646	-0.462406
TCGA-E9-A1RB	BRCA	[ 0. 0. -1. 0. 0. 0. 0. 0. 0. 0. 0. 0. 0. 0. 0. 0. 0.]	3 (negative);	tamoxifen/enzalutamide	non-TNBC	-0.711159	-0.412226	-0.869744
TCGA-E9-A1RC	BRCA	[ 0. 0. -1. 0. 0. 0. -1. 0. 0. 0. 0. 0. 0. 0. 0. 0. 0.]	3 (negative); 7 (negative);	tamoxifen/enzalutamide, erlotinib/tamoxifen/enzalutamide	non-TNBC	0.192363	0.815841	-0.461273
TCGA-E9-A1RD	BRCA	[ 0. 0. -1. 0. 0. 0. 0. 0. 0. 0. 0. 0. 0. 0. 0. 0. 0.]	3 (negative);	tamoxifen/enzalutamide	non-TNBC	0.751796	0.0811532	-0.708379
TCGA-E9-A1RE	BRCA	[ 0. 1. -1. 0. 0. 0. 0. 0. 0. 0. 0. 0. 0. 0. 0. 0. 0.]	2 (positive); 3 (negative);	ramucirumab, tamoxifen/enzalutamide	non-TNBC	0.00172035	0.20543	-0.655016
TCGA-E9-A1RF	BRCA	[ 0. 1. -1. 0. 0. 0. 0. 0. 0. 0. 0. 0. 0. 0. 0. 0. 0.]	2 (positive); 3 (negative);	ramucirumab, tamoxifen/enzalutamide	non-TNBC	-0.2938	0.0239152	-0.428523
TCGA-E9-A1RG	BRCA	[ 0. 1. -1. 0. 0. 0. 0. 0. 0. 0. 0. 0. 0. 0. 0. 0. 0.]	2 (positive); 3 (negative);	ramucirumab, tamoxifen/enzalutamide	non-TNBC	0.0101797	-0.123639	-0.670513
TCGA-E9-A1RH	BRCA	[-1. 0. -1. 0. 0. 0. 0. 0. 0. 0. 0. 0. 0. 0. 0. 0. 0.]	1 (negative); 3 (negative);	erlotinib, tamoxifen/enzalutamide	non-TNBC	1.3286	0.858373	0.000578525
TCGA-E9-A1RI	BRCA	[ 0. 0. -1. 0. 0. 0. 0. 0. 0. 0. 0. 0. 0. 0. 0. 0. 0.]	3 (negative);	tamoxifen/enzalutamide	non-TNBC	-0.0407558	0.283941	-0.5023
TCGA-E9-A226	BRCA	[ 0. 0. -1. 0. 0. 0. 0. 0. 0. 0. 0. 0. 0. 0. 0. 0. 0.]	3 (negative);	tamoxifen/enzalutamide	non-TNBC	0.0290466	-0.0888721	-0.407986
TCGA-E9-A227	BRCA	[ 0. 0. -1. 0. 0. 0. 0. 0. 0. 0. 0. 0. 0. 0. 0. 0. 0.]	3 (negative);	tamoxifen/enzalutamide	non-TNBC	0.207146	0.0104882	-0.522407
TCGA-E9-A228	BRCA	[ 0. 1. -1. 0. 0. 0. 0. 0. 0. 0. 0. 0. 0. 0. 0. 0. 0.]	2 (positive); 3 (negative);	ramucirumab, tamoxifen/enzalutamide	non-TNBC	0.221961	-0.0656929	-0.404769
TCGA-E9-A229	BRCA	[-1. 0. -1. 0. 0. 0. 0. 0. 0. 0. 0. 0. 0. 0. 0. 0. 0.]	1 (negative); 3 (negative);	erlotinib, tamoxifen/enzalutamide	TNBC	0.321403	0.328485	-0.484605
TCGA-E9-A22A	BRCA	[ 0. 0. 0. 0. 0. 0. 0. 0. 0. 0. 0. 0. 0. 0. 0. 0. 0.]			non-TNBC	-0.284087	-0.12044	-0.0882988
TCGA-E9-A22B	BRCA	[ 0. 1. -1. 0. 0. 0. 0. 0. 0. 0. 0. 0. 0. 0. 0. 0. 0.]	2 (positive); 3 (negative);	ramucirumab, tamoxifen/enzalutamide	TNBC	-0.130873	0.0740828	-0.309377
TCGA-E9-A22D	BRCA	[ 0. 1. -1. 0. 0. 0. 0. 0. 0. 0. 0. 0. 0. 0. 0. 0. 0.]	2 (positive); 3 (negative);	ramucirumab, tamoxifen/enzalutamide	non-TNBC	0.108426	-0.0632421	-0.238634
TCGA-E9-A22E	BRCA	[ 0. 0. -1. 0. 0. 0. 0. 0. 0. 0. 0. 0. 0. 0. 0. 0. 0.]	3 (negative);	tamoxifen/enzalutamide	non-TNBC	0.141542	0.253494	-0.128928
TCGA-E9-A22G	BRCA	[ 0. 0. 0. 0. 0. 0. 0. 0. 0. 0. 0. 0. 0. 0. 0. 0. 0.]			non-TNBC	0.42924	0.141428	0.0198708
TCGA-E9-A22H	BRCA	[ 0. 0. -1. 0. 0. 0. 0. 0. 0. 0. 0. 0. 0. 0. 0. 0. 0.]	3 (negative);	tamoxifen/enzalutamide	non-TNBC	0.514358	-0.121911	-0.389464
TCGA-E9-A243	BRCA	[-1. 0. 0. 0. 0. 0. 0. 0. 0. 0. 0. 0. 0. 0. 0. 0. 0.]	1 (negative);	erlotinib	non-TNBC	0.537806	0.262257	-0.241295
TCGA-E9-A244	BRCA	[-1. 0. 0. 0. 0. 0. 0. 0. 0. 0. 0. 0. 0. 0. 0. 0. 0.]	1 (negative);	erlotinib	non-TNBC	1.74945	0.551925	-0.0077822
TCGA-E9-A245	BRCA	[-1. 0. -1. 0. 0. 0. 0. 0. 0. 0. 0. 0. 0. 0. 0. 0. 0.]	1 (negative); 3 (negative);	erlotinib, tamoxifen/enzalutamide	non-TNBC	1.00255	1.37911	-0.454476
TCGA-E9-A247	BRCA	[ 0. 1. -1. 0. 0. 0. 0. 0. 0. 0. 0. 0. 0. 0. 0. 0. 0.]	2 (positive); 3 (negative);	ramucirumab, tamoxifen/enzalutamide	non-TNBC	0.0566	-0.0995859	-0.704261
TCGA-E9-A248	BRCA	[ 0. 0. 0. 0. 0. 0. 0. 0. 0. 0. 0. 0. 0. 0. 0. 0. 0.]			non-TNBC	0.89188	-0.0831035	-0.205914
TCGA-E9-A249	BRCA	[ 0. 0. -1. 0. 0. 0. 0. 0. 0. 0. 0. 0. 0. 0. 0. 0. 0.]	3 (negative);	tamoxifen/enzalutamide	non-TNBC	0.259315	0.51841	-0.554148
TCGA-E9-A24A	BRCA	[ 0. 0. -1. 0. 0. 0. 0. 0. 0. 0. 0. 0. 0. 0. 0. 0. 0.]	3 (negative);	tamoxifen/enzalutamide	non-TNBC	0.435119	0.122932	-0.445944
TCGA-E9-A295	BRCA	[-1. 0. -1. 0. 0. 0. 0. 0. 0. 0. 0. 0. 0. 0. 0. 0. 0.]	1 (negative); 3 (negative);	erlotinib, tamoxifen/enzalutamide	TNBC	0.812513	0.788796	0.172487
TCGA-E9-A2JS	BRCA	[ 0. 0. -1. 0. 0. 0. 0. 0. 0. 0. 0. 0. 0. 0. 0. 0. 0.]	3 (negative);	tamoxifen/enzalutamide	non-TNBC	0.258628	-0.138119	-0.401853
TCGA-E9-A2JT	BRCA	[-1. 0. -1. 0. 0. 0. 0. 0. 0. 0. 0. 0. 0. 0. 0. 0. 0.]	1 (negative); 3 (negative);	erlotinib, tamoxifen/enzalutamide	non-TNBC	0.135646	0.0194523	-0.0667552
TCGA-E9-A3HO	BRCA	[ 0. 0. -1. -1. 0. 0. 0. 0. 0. 0. 0. 0. 0. 0. 0. 0. 0.]	3 (negative); 4 (negative);	tamoxifen/enzalutamide, *	non-TNBC	0.434669	0.182634	-0.265798
TCGA-E9-A3Q9	BRCA	[ 0. 0. -1. 0. 0. 0. 0. 0. 0. 0. 0. 0. 0. 0. 0. 0. 0.]	3 (negative);	tamoxifen/enzalutamide	non-TNBC	0.0203933	0.0299562	-0.274486
TCGA-E9-A3QA	BRCA	[-1. 0. 0. 0. 0. 0. 0. 0. 0. 0. 0. 0. 0. 0. 0. 0. 0.]	1 (negative);	erlotinib	non-TNBC	0.0962031	-0.156664	-0.145688
TCGA-E9-A3X8	BRCA	[ 0. 0. -1. 0. 0. 0. 0. 0. 0. 0. 0. 0. 0. 0. 0. 0. 0.]	3 (negative);	tamoxifen/enzalutamide	non-TNBC	0.140562	0.0293628	-0.277526
TCGA-EW-A1IX	BRCA	[-1. 0. -1. -1. 0. -1. 0. 0. 0. 0. 0. 0. 0. 0. 0. 0. 0.]	1 (negative); 3 (negative); 4 (negative); 6 (negative);	erlotinib, tamoxifen/enzalutamide, *	non-TNBC	1.68907	1.53457	0.10047
TCGA-EW-A1IZ	BRCA	[ 0. 0. -1. 0. 0. 0. 0. 0. 0. 0. 0. 0. 0. 0. 0. 0. 0.]	3 (negative);	tamoxifen/enzalutamide	non-TNBC	-0.354013	0.613348	-0.321056
TCGA-EW-A1J1	BRCA	[ 0. 1. -1. 0. 0. 0. 0. 0. 0. 0. 0. 0. 0. 0. 0. 0. 0.]	2 (positive); 3 (negative);	ramucirumab, tamoxifen/enzalutamide	non-TNBC	-0.428055	0.133108	-0.644195
TCGA-EW-A1J2	BRCA	[-1. 0. -1. -1. 0. 0. 0. 0. 0. 0. 0. 0. 0. 0. 0. 0. 0.]	1 (negative); 3 (negative); 4 (negative);	erlotinib, tamoxifen/enzalutamide, *	non-TNBC	1.14006	1.45157	-0.197771
TCGA-EW-A1J3	BRCA	[ 0. 0. -1. 0. 0. 0. 0. 1. 0. 0. 0. 0. 0. 0. 0. 0. 0.]	3 (negative); 8 (positive);	tamoxifen/enzalutamide, erlotinib/ramucirumab	non-TNBC	3.61261	0.12661	-0.687569
TCGA-EW-A1J5	BRCA	[ 0. 1. -1. 0. 0. 0. -1. 1. 0. 0. 0. 0. 0. 0. 0. 0. 0.]	2 (positive); 3 (negative); 7 (negative); 8 (positive);	ramucirumab, tamoxifen/enzalutamide, erlotinib/tamoxifen/enzalutamide, erlotinib/ramucirumab	non-TNBC	-0.0680773	0.532436	-0.580806
TCGA-EW-A1OV	BRCA	[ 0. 0. -1. 0. 0. 0. 0. 0. 0. 0. 0. 0. 0. 0. 0. 0. 0.]	3 (negative);	tamoxifen/enzalutamide	non-TNBC	-0.10347	0.23634	-0.320607
TCGA-EW-A1OW	BRCA	[ 0. 0. 0. 0. 0. 0. 0. 0. 0. 0. 0. 0. 0. 0. 0. 0. 0.]			non-TNBC	-0.404244	-0.193526	-0.335931
TCGA-EW-A1OX	BRCA	[ 0. 1. -1. 0. 0. 0. 0. 0. 0. 0. 0. 0. 0. 0. 0. 0. 0.]	2 (positive); 3 (negative);	ramucirumab, tamoxifen/enzalutamide	non-TNBC	0.202458	0.783712	-0.321811
TCGA-EW-A1OY	BRCA	[ 0. 1. -1. 0. 0. 0. 0. 0. 0. 0. 0. 0. 0. 0. 0. 0. 0.]	2 (positive); 3 (negative);	ramucirumab, tamoxifen/enzalutamide	non-TNBC	0.0865207	0.308753	-0.624415
TCGA-EW-A1OZ	BRCA	[ 0. 1. -1. 0. 0. 0. 0. 0. 0. 0. 0. 0. 0. 0. 0. 0. 0.]	2 (positive); 3 (negative);	ramucirumab, tamoxifen/enzalutamide	non-TNBC	1.99561	0.173657	-0.583195
TCGA-EW-A1P0	BRCA	[ 0. 1. -1. 0. 0. 0. -1. 0. 0. 0. 0. 0. 0. 0. 0. 0. 0.]	2 (positive); 3 (negative); 7 (negative);	ramucirumab, tamoxifen/enzalutamide, erlotinib/tamoxifen/enzalutamide	non-TNBC	-0.348829	0.316419	-0.507031
TCGA-EW-A1P1	BRCA	[-1. 1. -1. 0. 0. 0. 0. 0. 0. 0. 0. 0. 0. 0. 0. 0. 0.]	1 (negative); 2 (positive); 3 (negative);	erlotinib, ramucirumab, tamoxifen/enzalutamide	non-TNBC	0.464385	0.577294	-0.00720734
TCGA-EW-A1P3	BRCA	[-1. 1. -1. -1. 0. 0. 0. 0. 0. 0. 0. 0. 0. 0. 0. 0. 0.]	1 (negative); 2 (positive); 3 (negative); 4 (negative);	erlotinib, ramucirumab, tamoxifen/enzalutamide, *	non-TNBC	0.198275	1.31714	-0.337497
TCGA-EW-A1P4	BRCA	[-1. 0. -1. -1. 0. 0. 0. 0. 0. 0. 0. 0. 0. 0. 0. 0. 0.]	1 (negative); 3 (negative); 4 (negative);	erlotinib, tamoxifen/enzalutamide, *	non-TNBC	0.265585	1.09635	-0.11355
TCGA-EW-A1P5	BRCA	[ 0. 0. -1. 0. 0. 0. 0. 0. 0. 0. 0. 0. 0. 0. 0. 0. 0.]	3 (negative);	tamoxifen/enzalutamide	non-TNBC	-0.107833	0.038371	-0.587538
TCGA-EW-A1P8	BRCA	[ 0. 0. 0. 0. 0. 0. 0. 0. 0. 0. 0. 0. 0. 0. 0. 0. 0.]			TNBC	-0.0988274	-0.185273	-0.406471
TCGA-EW-A1PA	BRCA	[ 0. 1. -1. -1. 0. 0. 0. 0. 0. 0. 0. 0. 0. 0. 0. 0. 0.]	2 (positive); 3 (negative); 4 (negative);	ramucirumab, tamoxifen/enzalutamide, *	non-TNBC	0.683177	0.4377	-0.552334
TCGA-EW-A1PB	BRCA	[ 0. 0. 0. 0. 0. 0. 0. 0. 0. 0. 0. 0. 0. 0. 0. 0. 0.]			non-TNBC	-0.111788	0.0503321	0.0927057
TCGA-EW-A1PC	BRCA	[ 1. 1. 0. 0. 0. 0. 0. 0. 0. 0. 0. 0. 0. 0. 0. 0. 0.]	1 (positive); 2 (positive);	tamoxifen, ramucirumab	non-TNBC	0.134455	0.0947162	-0.494006
TCGA-EW-A1PD	BRCA	[-1. 0. -1. 0. 0. 0. 0. 0. 0. 0. 0. 0. 0. 0. 0. 0. 0.]	1 (negative); 3 (negative);	erlotinib, tamoxifen/enzalutamide	non-TNBC	1.84091	0.650868	-0.212624
TCGA-EW-A1PE	BRCA	[ 0. 0. -1. 0. 0. 0. 0. 0. 0. 0. 0. 0. 0. 0. 0. 0. 0.]	3 (negative);	tamoxifen/enzalutamide	non-TNBC	0.25959	0.322826	-0.428629
TCGA-EW-A1PG	BRCA	[-1. 1. -1. 0. 0. 0. 0. 0. 0. 0. 0. 0. 0. 0. 0. 0. 0.]	1 (negative); 2 (positive); 3 (negative);	erlotinib, ramucirumab, tamoxifen/enzalutamide	non-TNBC	0.682682	0.8665	-0.317962
TCGA-EW-A2FR	BRCA	[ 0. 0. 0. 0. 0. 0. 0. 0. 0. 0. 0. 0. 0. 0. 0. 0. 0.]			non-TNBC	1.31048	-0.296159	-0.344626
TCGA-EW-A2FS	BRCA	[ 0. 0. -1. 0. 0. 0. 0. 0. 0. 0. 0. 0. 0. 0. 0. 0. 0.]	3 (negative);	tamoxifen/enzalutamide	non-TNBC	-0.0187615	-0.25585	0.130484
TCGA-EW-A2FV	BRCA	[ 0. 0. -1. 0. 0. 0. 0. 0. 0. 0. 0. 0. 0. 0. 0. 0. 0.]	3 (negative);	tamoxifen/enzalutamide	non-TNBC	0.293471	-0.312896	-0.208965
TCGA-EW-A2FW	BRCA	[ 1. 0. -1. 0. 0. 0. 0. 0. 0. 0. 0. 0. 0. 0. 0. 0. 0.]	1 (positive); 3 (negative);	tamoxifen, tamoxifen/enzalutamide	non-TNBC	-0.234772	-0.202074	-0.268526
TCGA-EW-A3U0	BRCA	[ 0. 0. 0. 0. 0. 0. 0. 0. 0. 0. 0. 0. 0. 0. 0. 0. 0.]			non-TNBC	-0.0978965	-0.0973632	-0.220478
TCGA-GI-A2C8	BRCA	[-1. 0. -1. 0. 0. 0. 0. 0. 0. 0. 0. 0. 0. 0. 0. 0. 0.]	1 (negative); 3 (negative);	erlotinib, tamoxifen/enzalutamide	non-TNBC	0.632549	1.21326	-0.360139
TCGA-GI-A2C9	BRCA	[ 0. 0. 0. 0. 0. 0. 0. 0. 0. 0. 0. 0. 0. 0. 0. 0. 0.]			non-TNBC	0.234125	-0.131186	0.0146437
TCGA-GM-A2D9	BRCA	[ 0. 0. -1. 0. 0. 0. 0. 0. 0. 0. 0. 0. 0. 0. 0. 0. 0.]	3 (negative);	tamoxifen/enzalutamide	non-TNBC	-0.04211	-0.0347373	-0.340069
TCGA-GM-A2DB	BRCA	[ 0. 0. 0. 0. 0. 0. 0. 0. 0. 0. 0. 0. 0. 0. 0. 0. 0.]			non-TNBC	0.0906816	0.051271	0.120727
TCGA-GM-A2DC	BRCA	[ 0. 1. -1. 0. 0. 0. 0. 0. 0. 0. 0. 0. 0. 0. 0. 0. 0.]	2 (positive); 3 (negative);	ramucirumab, tamoxifen/enzalutamide	non-TNBC	0.0599539	-0.298203	-0.240735
TCGA-GM-A2DD	BRCA	[ 0. 0. 0. -1. 0. 0. 0. 0. 0. 0. 0. 0. 0. 0. 0. 0. 0.]	4 (negative);	*	non-TNBC	0.354649	0.0165673	0.469737
TCGA-GM-A2DF	BRCA	[ 0. 0. 0. 0. 0. 0. 0. 0. 0. 0. 0. 0. 0. 0. 0. 0. 0.]			non-TNBC	0.0817627	-0.00140285	0.114008
TCGA-GM-A2DH	BRCA	[ 0. 0. 0. 0. 0. 0. 0. 0. 0. 0. 0. 0. 0. 0. 0. 0. 0.]			TNBC	0.102859	-0.182105	-0.334214
TCGA-GM-A2DI	BRCA	[-1. 0. -1. 0. 0. 0. 0. 0. 0. 0. 0. 0. 0. 0. 0. 0. 0.]	1 (negative); 3 (negative);	erlotinib, tamoxifen/enzalutamide	non-TNBC	0.614986	-0.116609	-0.104238
TCGA-GM-A2DK	BRCA	[ 0. 1. 0. 0. 0. 0. 0. 0. 0. 0. 0. 0. 0. 0. 0. 0. 0.]	2 (positive);	ramucirumab	non-TNBC	0.00907429	0.135915	-0.0731021
TCGA-GM-A2DL	BRCA	[ 0. 1. -1. 0. 0. 0. 0. 0. 0. 0. 0. 0. 0. 0. 0. 0. 0.]	2 (positive); 3 (negative);	ramucirumab, tamoxifen/enzalutamide	non-TNBC	0.0847204	-0.178989	-0.0957866
TCGA-GM-A2DM	BRCA	[ 0. 0. -1. 0. 0. 0. 0. 0. 0. 0. 0. 0. 0. 0. 0. 0. 0.]	3 (negative);	tamoxifen/enzalutamide	TNBC	-0.0156425	-0.0406551	-0.429894
TCGA-GM-A2DN	BRCA	[ 0. 1. -1. 0. 0. 0. 0. 0. 0. 0. 0. 0. 0. 0. 0. 0. 0.]	2 (positive); 3 (negative);	ramucirumab, tamoxifen/enzalutamide	non-TNBC	0.0321724	-0.192402	-0.256444
TCGA-GM-A2DO	BRCA	[ 0. 0. -1. 0. 0. 0. 0. 0. 0. 0. 0. 0. 0. 0. 0. 0. 0.]	3 (negative);	tamoxifen/enzalutamide	non-TNBC	-0.1491	-0.20529	-0.42688
TCGA-GM-A3NY	BRCA	[-1. 1. -1. 0. 1. 0. 0. 0. 0. 0. 0. 0. 0. 0. 0. 0. 0.]	1 (negative); 2 (positive); 3 (negative); 5 (positive);	erlotinib, ramucirumab, tamoxifen/enzalutamide, tamoxifen	non-TNBC	-0.134522	0.180616	0.0981558
TCGA-GM-A3XL	BRCA	[ 0. 0. 0. 0. 0. 0. 0. 0. 0. 0. 0. 0. 0. 0. 0. 0. 0.]			non-TNBC	0.164373	0.100523	0.13542
TCGA-GM-A3XN	BRCA	[ 0. 0. -1. 0. 0. 0. 0. 0. 0. 0. 0. 0. 0. 0. 0. 0. 0.]	3 (negative);	tamoxifen/enzalutamide	TNBC	-0.00395751	-0.0538453	-0.298938
TCGA-HN-A2NL	BRCA	[-1. 0. -1. 0. 0. 0. 0. 0. 0. 0. 0. 0. 0. 0. 0. 0. 0.]	1 (negative); 3 (negative);	erlotinib, tamoxifen/enzalutamide	non-TNBC	0.0953673	0.239372	0.260813
TCGA-JL-A3YW	BRCA	[ 0. 0. 0. 0. 0. 0. 0. 1. 0. 0. 0. 0. 0. 0. 0. 0. 0.]	8 (positive);	erlotinib/ramucirumab	non-TNBC	0.00153354	0.0278648	0.38866
TCGA-JL-A3YX	BRCA	[-1. 0. -1. -1. 0. 0. 0. 0. 0. 0. 0. 0. 0. 0. 0. 0. 0.]	1 (negative); 3 (negative); 4 (negative);	erlotinib, tamoxifen/enzalutamide, *	non-TNBC	0.743959	0.148549	0.482729

## Sheet: B. Unbalanced processes
Unbalanced process (α)	Proteins and phosphoproteins that participate in the unbalanced process * The fuctional connections between the proteins are presented in Figure S1 ** The weight of participation (G) is listed in parenthesis for each protein *** Note that (+/-) signs represent correlation or anti-correlation between proteins in the process, and not direction of change in expression level	Number of breast cancer patients that harbor this process
1	ACC1 (0.128), CAVEOLIN1 (-0.209), COLLAGENVI (-0.141), CYCLINB1 (0.221), ECADHERIN (0.103), EGFRPY1068 (-0.285), EGFRPY1173 (-0.138), ERALPHA (0.166), HER2PY1248 (-0.123), HSP70 (-0.144), MAPKPT202Y204 (-0.165), S6 (0.139), SRCPY416 (-0.149), PAI1 (-0.112), FASN (0.205), MYH11 (-0.412), NDRG1PT346 (-0.349), RBM15 (0.136), TRFC (0.116)	152
2	AKTPS473 (-0.231), AKTPT308 (-0.205), CLAUDIN7 (0.280), ECADHERIN (0.232), EGFRPY1068 (-0.132), GATA3 (0.157), GSK3ALPHABETAPS21S9 (-0.127), INPP4B (0.213), VEGFR2 (0.116), EGFR (-0.103), FASN (0.131), GAPDH (-0.191), GSK3PS9 (-0.155), MYH11 (0.346), NDRG1PT346 (-0.137), RAB25 (0.154), RICTOR (0.142), VHL (0.317), ACETYLATUBULIN(LYS40) (-0.156)	179
3	AR (-0.229), BCL2 (-0.109), BETACATENIN (0.109), CASPASE7CLEAVEDD198 (0.156), COLLAGENVI (-0.138), CYCLINB1 (0.146), CYCLINE1 (0.105), ECADHERIN (0.128), EEF2 (0.150), ERALPHA (-0.364), FIBRONECTIN (-0.122), GATA3 (-0.329), HSP70 (-0.113), INPP4B (-0.216), MAPKPT202Y204 (-0.160), FASN (-0.191), GAPDH (0.327), MYH11 (0.134), NDRG1PT346 (0.111), PEA15PS116 (0.101), TRANSGLUTAMINASE (0.109), TRFC (0…	563
4	53BP1 (0.139), AKTPS473 (0.109), AMPKPT172 (0.110), ATM (0.122), BETACATENIN (0.288), CASPASE7CLEAVEDD198 (-0.111), CLAUDIN7 (0.102), ECADHERIN (0.154), EEF2K (0.105), EGFRPY1068 (0.178), ERALPHA (0.151), ERK2 (0.115), GAB2 (0.128), GSK3ALPHABETAPS21S9 (0.149), HER2 (0.149), HSP70 (-0.132), NFKBP65PS536 (0.159), STAT5ALPHA (0.114), SYK (0.105), TUBERIN (0.108), PAI1 (-0.185), BRAF (0.130), GAPDH …	87
5	AKTPS473 (0.103), BCL2 (0.148), BETACATENIN (-0.102), CAVEOLIN1 (0.100), CLAUDIN7 (-0.125), CYCLINB1 (-0.184), EGFRPY1068 (-0.359), EGFRPY1173 (-0.196), ERALPHA (0.324), HER2PY1248 (-0.255), IGFBP2 (-0.179), SRCPY416 (-0.228), PAI1 (-0.146), ASNS (-0.106), EGFR (-0.117), GAPDH (0.259), MYH11 (0.316), PEA15PS116 (0.105), RICTOR (0.107), TRFC (-0.105), ETS1 (0.132)	24
6	ERALPHA (0.171), ERK2 (-0.110), PKCALPHA (-0.163), PKCALPHAPS657 (-0.158), S6PS235S236 (0.107), STAT5ALPHA (-0.108), PAI1 (0.105), GAPDH (0.184), MYH11 (-0.302), NDRG1PT346 (0.426), PDCD4 (0.124), RICTOR (-0.217), VHL (0.355), ACETYLATUBULIN(LYS40) (-0.222)	19
7	4EBP1PT37T46 (0.103), AKTPS473 (0.141), AKTPT308 (0.123), AR (-0.113), CAVEOLIN1 (0.213), EGFRPY1068 (-0.112), EGFRPY1173 (-0.167), ERALPHA (-0.155), ERK2 (-0.105), GSK3ALPHABETAPS21S9 (0.144), HSP70 (-0.119), IGFBP2 (-0.145), MAPKPT202Y204 (0.101), NCADHERIN (-0.129), NFKBP65PS536 (0.122), P38PT180Y182 (0.150), S6PS235S236 (0.167), S6PS240S244 (0.147), SRCPY527 (0.160), FASN (0.109), GAPDH (-0.3…	26
8	ACCPS79 (0.150), ACC1 (0.163), CLAUDIN7 (-0.153), CYCLINB1 (-0.104), CYCLINE1 (-0.168), EEF2 (0.143), EGFRPY1068 (0.108), ERALPHA (-0.215), GAB2 (-0.116), GATA3 (0.213), IGFBP2 (-0.385), INPP4B (0.176), MAPKPT202Y204 (-0.113), PDK1PS241 (0.109), SYK (-0.141), VEGFR2 (0.127), FASN (0.303), GAPDH (0.286), MYH11 (-0.165), PDCD4 (-0.112), RAB25 (0.101), RICTOR (-0.100), ACETYLATUBULIN(LYS40) (-0.165)	20
9	ACCPS79 (0.106), AKTPS473 (0.236), AKTPT308 (0.256), ATM (-0.213), CMYC (-0.125), CLAUDIN7 (0.226), ECADHERIN (0.181), EEF2 (0.114), ERALPHA (0.318), ERALPHAPS118 (0.139), FIBRONECTIN (-0.104), GAB2 (-0.209), GSK3ALPHABETAPS21S9 (0.110), IGFBP2 (0.147), NFKBP65PS536 (-0.116), PAXILLIN (-0.105), STAT5ALPHA (-0.180), EIF4G (-0.114), GAPDH (0.112), MYH11 (0.102), RICTOR (-0.119), TRFC (0.183), VHL (…	14
10	4EBP1PT37T46 (0.126), AKTPS473 (0.136), BAK (-0.108), BCL2 (-0.105), CAVEOLIN1 (-0.172), CLAUDIN7 (0.127), COLLAGENVI (0.110), ECADHERIN (-0.147), EGFRPY1068 (-0.200), EGFRPY1173 (-0.120), ERALPHA (-0.168), FIBRONECTIN (0.121), GSK3ALPHABETAPS21S9 (0.117), HER2PY1248 (-0.108), MAPKPT202Y204 (0.274), P53 (0.101), P70S6KPT389 (0.130), PAXILLIN (-0.121), RBPS807S811 (0.121), S6PS235S236 (0.127), SRC…	3
11	ACC1 (0.171), BETACATENIN (-0.102), CAVEOLIN1 (0.148), CLAUDIN7 (-0.174), CYCLINB1 (0.200), ECADHERIN (-0.305), ERALPHA (0.124), FIBRONECTIN (0.156), HER3 (-0.107), IGFBP2 (0.322), PAI1 (0.249), ASNS (0.138), FASN (0.190), GAPDH (0.242), MYH11 (0.203), PDCD4 (-0.161), PEA15PS116 (-0.132), RAB25 (-0.108), RICTOR (0.165), TRFC (0.206), VHL (0.191), ACETYLATUBULIN(LYS40) (0.140)	4
12	ACCPS79 (0.105), ACC1 (0.142), ATM (0.170), CAVEOLIN1 (-0.223), CLAUDIN7 (0.140), EEF2 (-0.152), FIBRONECTIN (-0.123), HER2 (-0.169), HER2PY1248 (-0.114), IGFBP2 (-0.216), NFKBP65PS536 (-0.108), P53 (0.106), PAXILLIN (-0.153), PKCALPHAPS657 (0.133), S6 (0.102), SHCPY317 (0.103), SRCPY527 (0.109), SYK (0.148), YB1 (-0.169), ASNS (0.144), FASN (0.123), MYH11 (0.103), NDRG1PT346 (0.108), PEA15PS116 …	4
13	AKTPS473 (0.106), AMPKPT172 (-0.103), BAX (-0.112), BETACATENIN (-0.156), CMYC (0.122), CASPASE7CLEAVEDD198 (-0.119), CAVEOLIN1 (-0.111), CYCLINB1 (0.104), EGFRPY1068 (0.412), EGFRPY1173 (0.141), ERK2 (-0.102), HER2PY1248 (0.125), IGFBP2 (-0.108), INPP4B (-0.165), MAPKPT202Y204 (-0.140), P38PT180Y182 (-0.109), P53 (0.113), PEA15 (-0.131), PTEN (-0.127), SHCPY317 (0.118), SYK (-0.199), PAI1 (-0.17…	7
14	AKTPS473 (0.120), AKTPT308 (0.142), ATM (-0.141), CASPASE7CLEAVEDD198 (-0.233), CAVEOLIN1 (-0.262), CLAUDIN7 (0.129), ECADHERIN (0.140), EEF2 (-0.111), EGFRPY1068 (-0.287), EGFRPY1173 (-0.134), ERALPHA (-0.285), HER2PY1248 (-0.148), IGFBP2 (0.127), MAPKPT202Y204 (-0.124), P38PT180Y182 (-0.125), RAD50 (-0.113), S6PS235S236 (-0.160), S6PS240S244 (-0.125), SRCPY416 (-0.103), SYK (-0.121), BRAF (0.12…	7
15	4EBP1 (0.103), 4EBP1PT37T46 (0.133), AKTPS473 (-0.199), AKTPT308 (-0.263), CAVEOLIN1 (-0.115), CYCLINB1 (0.142), GAB2 (0.113), GATA3 (0.124), HER2 (0.111), IGFBP2 (0.111), NFKBP65PS536 (0.109), PKCALPHA (-0.119), PTEN (0.106), RBPS807S811 (0.120), FOXM1 (0.100), GAPDH (0.241), MYH11 (0.273), NDRG1PT346 (0.120), PEA15PS116 (0.109), RAB25 (-0.131), TRANSGLUTAMINASE (-0.141), VHL (-0.491), ACETYLATU…	6
16	AKTPS473 (-0.213), AKTPT308 (-0.159), CASPASE7CLEAVEDD198 (-0.358), CAVEOLIN1 (0.340), HER2 (-0.134), HSP70 (-0.206), LCK (-0.159), PKCALPHA (0.117), S6PS240S244 (-0.131), SRCPY527 (0.163), STAT5ALPHA (-0.172), SYK (-0.210), VEGFR2 (0.117), YAPPS127 (0.105), GAPDH (0.267), MYH11 (-0.155), NDRG1PT346 (-0.120), PEA15PS116 (-0.105), RAB25 (0.109), RICTOR (0.163), TRANSGLUTAMINASE (-0.125), P62LCKLIG…	9
17	AMPKPT172 (-0.202), BCL2 (-0.170), BIM (-0.102), CASPASE7CLEAVEDD198 (-0.143), ECADHERIN (0.119), FIBRONECTIN (0.129), HER2 (0.139), IGFBP2 (-0.118), INPP4B (0.213), NFKBP65PS536 (-0.112), S6 (0.137), S6PS235S236 (0.317), S6PS240S244 (0.294), SRCPY416 (-0.101), SRCPY527 (-0.197), YAPPS127 (0.160), PAI1 (0.207), G6PD (0.200), NDRG1PT346 (-0.164), PDCD4 (0.112), TRANSGLUTAMINASE (0.218), VHL (-0.15…	1

## Sheet: C. Hubs and drugs in processes 
Unbalanced process	Sign of amplitude	Major targetable hubs	Suggested drugs
1	positive	Estrogen receptor	tamoxifen
	negative	EGFR	erlotinib
2	positive	VEGFR2	ramucirumab
	negative	EGFR	erlotinib
3	positive	*	*
	negative	Estrogen receptor, androgen receptor	tamoxifen/enzalutamide
4	positive	EGFR, Her2	lapatinib
	negative	*	*
5	positive	Estrogen receptor	tamoxifen
	negative	EGFR, Src	erlotinib/dasatinib
6	positive	Estrogen receptor	tamoxifen
	negative	*	*
7	positive	Src	dasatinib
	negative	EGFR, Estrogen receptor, Androgen receptor	erlotinib/tamoxifen/enzalutamide
8	positive	EGFR, VEGFR2	erlotinib/ramucirumab
	negative	Estrogen receptor	tamoxifen
9	positive	Estrogen receptor	tamoxifen
	negative	*	*
10	positive	Src	dasatinib
	negative	EGFR, estrogen receptor, Braf	erlotinib/tamoxifen/vemurafenib
11	positive	Estrogen receptor	tamoxifen
	negative	*	*
12	positive	Src	dasatinib
	negative	Her2	trastuzumab
13	positive	EGFR	erlotinib
	negative	*	*
14	positive	Braf	vemurafenib
	negative	EGFR, estrogen receptor, Src	erlotinib/tamoxifen/dasatinib
15	positive	Her2	trastuzumab
	negative	*	*
16	positive	VEGFR2, Src	Ramucirumab/dasatinib
	negative	Her2	trastuzumab
17	positive	Her2	trastuzumab
	negative	Src	dasatinib
* Until today no such drug has entered the clinic
